# Supplementary material for: Zinc(ii)-catalyzed intramolecular hydroarylation-redox cross-dehydrogenative coupling ofN-propargylanilines with diverse carbon pronucleophiles: facile access to functionalized tetrahydroquinolines
Source: Royal Society of Chemistry journal article supplement (doi:10.1039/d0cc02921a), 2020-01-01

## Supporting Information

### **Zinc(II)-catalyzed Intramolecular Hydroarylation-Redox Cross-Dehydrogenative Coupling of *N*-Propargylanilines with Diverse Carbon Pronucleophiles: Facile Access to Functionalized Tetrahydroquinolines**

*Guangzhe Li, <sup>\*a,b</sup> Chengdong Wang, <sup>a</sup> Yueqing Li, <sup>a,b</sup> Kun Shao, <sup>b</sup> Guo Yu, <sup>c</sup> Shisheng Wang, <sup>a,b</sup> Xiuhan Guo, <sup>a,b</sup> Weijie Zhao <sup>a,b</sup> and Hiroyuki Nakamura <sup>c</sup>*

<sup>a</sup> Department of Pharmacy, School of Chemical Engineering, Dalian University of Technology, No. 2 Linggong Road, Dalian 116024, China.

<sup>b</sup> State Key Laboratory of Fine Chemicals, Dalian University of Technology, No. 2 Linggong Road, Dalian 116024, China.

<sup>c</sup> Laboratory for Chemistry and Life Science, Institute of Innovative Research, Tokyo Institute of Technology, Nagatsuta-cho, Midori-ku, Yokohama 226-8503, Japan.

## Table of Contents

|                                                                                                  |    |
|--------------------------------------------------------------------------------------------------|----|
| Table of Contents .....                                                                          | 1  |
| 1. General information .....                                                                     | 2  |
| 2. Optimization of the reaction conditions .....                                                 | 3  |
| 2.1 Optimization of the reaction conditions for nitromethane (Table S1) .....                    | 3  |
| 2.2 Optimization of the reaction conditions for phenylacetylene (Table S2) .....                 | 4  |
| 3. The DFT study reported by Zhang <i>et al.</i> (Scheme S1, Scheme S2, Scheme S3).....          | 5  |
| 4. Representative procedure .....                                                                | 7  |
| 4.1 Reaction of <i>N</i> -propargylaniline <b>1</b> with nitromethane <b>2</b> (Table 2).....    | 7  |
| 4.2 Synthesis of important intermediates (Scheme 2).....                                         | 11 |
| 4.3 Reaction of <i>N</i> -propargylaniline <b>1</b> with phenylacetylene <b>8</b> (Table 4)..... | 13 |
| 4.4 Synthesis of natural alkaloids and important intermediates (Scheme 3) .....                  | 18 |
| 4.5 Isotopic labeling experiments (Scheme 4, Scheme 5).....                                      | 21 |
| 5. Synthesis of starting materials.....                                                          | 24 |
| 6. References .....                                                                              | 32 |
| 7. Copies of <sup>1</sup> H-NMR, <sup>13</sup> C-NMR spectra.....                                | 33 |

## 1. General information

General Solvents and chemicals were reagent grade or better and obtained from commercial sources.  $^1\text{H-NMR}$  and  $^{13}\text{C-NMR}$  spectra were recorded on 400 MHz NMR Spectrometer instrument (Bruker Avance II, Vaian DLG400), 500 MHz NMR Spectrometer instrument (Bruker AVANCE III 500) and 600 MHz NMR Spectrometer instrument (Bruker Avance NEO 600M NMR Spectroscopy). Tetramethylsilane ( $\delta$  0.00) was used as internal standard for  $^1\text{H-NMR}$ .  $^{13}\text{C-NMR}$  was referenced to the residual solvent ( $\text{CDCl}_3$ ,  $\delta$  77.0). IR spectra were measured on a ThermoFisher-6700 spectrophotometer. Melting points were determined with a X6 melting point apparatus (Beijing Take Co., Ltd). Analytical thin layer chromatography (TLC) was performed on silica gel plates produced by Qingdao Haiyang Chemical Co. Ltd ( $200 \times 200$  mm, 0.2-0.25 mm). Detection: under 254 nm UV light. HRMS/MS data were detected with LTQ Orbitrap XL ETD Mass Spectrometer instrument (Thermo Scientific).

## 2. Optimization of the reaction conditions

### 2.1 Optimization of the reaction conditions for nitromethane (Table S1)

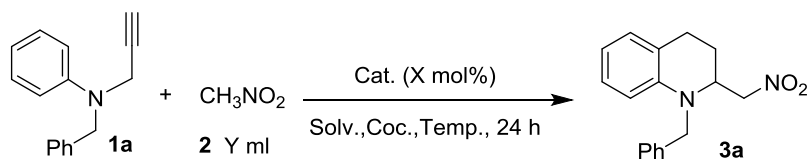

| Entry | Cat.                                    | X  | Solv.   | Coc. (M) | Y (ml) | Temp. (°C) | <b>3a</b> <sup>[a]</sup> (%) | Rec. <b>1a</b> <sup>[a]</sup> (%) |
|-------|-----------------------------------------|----|---------|----------|--------|------------|------------------------------|-----------------------------------|
| 1     | ZnI <sub>2</sub>                        | 20 | DCE     | 1        | 0.04   | 100        | 13                           | N.D.                              |
| 2     | Zn(ClO <sub>4</sub> ) <sub>2</sub>      | 20 | DCE     | 1        | 0.04   | 100        | N.D.                         | 46                                |
| 3     | ZnSO <sub>4</sub>                       | 20 | DCE     | 1        | 0.04   | 100        | N.D.                         | 96                                |
| 4     | ZnCl <sub>2</sub>                       | 20 | DCE     | 1        | 0.04   | 100        | 40                           | N.D.                              |
| 5     | Zn(OAc) <sub>2</sub>                    | 20 | DCE     | 1        | 0.04   | 100        | N.D.                         | 84                                |
| 6     | ZnBr <sub>2</sub>                       | 20 | DCE     | 1        | 0.04   | 100        | 65                           | N.D.                              |
| 7     | Zn(OAc) <sub>2</sub> ·2H <sub>2</sub> O | 20 | DCE     | 1        | 0.04   | 100        | N.D.                         | 81                                |
| 8     | ZnBr <sub>2</sub>                       | 20 | Toluene | 0.5      | 0.04   | 100        | 27                           | 52                                |
| 9     | ZnBr <sub>2</sub>                       | 20 | Aceton  | 0.5      | 0.04   | 100        | 31                           | 4                                 |
| 10    | ZnBr <sub>2</sub>                       | 20 | DCE     | 0.5      | 0.04   | 100        | 48                           | N.D.                              |
| 11    | ZnBr <sub>2</sub>                       | 20 | THF     | 0.5      | 0.04   | 100        | 48                           | N.D.                              |
| 12    | ZnBr <sub>2</sub>                       | 20 | MeOH    | 0.5      | 0.04   | 100        | 22                           | 5                                 |
| 13    | ZnBr <sub>2</sub>                       | 20 | DME     | 0.5      | 0.04   | 100        | N.D.                         | N.D.                              |
| 14    | Zn(OAc) <sub>2</sub>                    | 20 | Neat    | -        | 0.5    | 100        | 10                           | 67                                |
| 15    | ZnBr <sub>2</sub>                       | 20 | Neat    | -        | 0.5    | 100        | 71(65) <sup>[b]</sup>        | N.D.                              |
| 16    | ZnCl <sub>2</sub>                       | 20 | Neat    | -        | 0.5    | 100        | 46                           | 15                                |
| 17    | ZnI <sub>2</sub>                        | 20 | Neat    | -        | 0.5    | 100        | 51                           | N.D.                              |
| 18    | ZnSO <sub>4</sub>                       | 20 | Neat    | -        | 0.5    | 100        | 4                            | 90                                |
| 19    | CuBr <sub>2</sub>                       | 20 | Neat    | -        | 0.5    | 100        | 24                           | N.D.                              |
| 20    | CuBr                                    | 20 | Neat    | -        | 0.5    | 100        | 38                           | N.D.                              |
| 21    | Cu(OAc) <sub>2</sub>                    | 20 | Neat    | -        | 0.5    | 100        | N.D.                         | N.D.                              |
| 22    | CuSO <sub>4</sub>                       | 20 | Neat    | -        | 0.5    | 100        | 20                           | N.D.                              |
| 23    | Cu(OTf) <sub>2</sub>                    | 20 | Neat    | -        | 0.5    | 100        | N.D.                         | N.D.                              |
| 24    | PtCl <sub>2</sub>                       | 20 | Neat    | -        | 0.5    | 100        | N.D.                         | N.D.                              |
| 25    | Pd(OAc) <sub>2</sub>                    | 20 | Neat    | -        | 0.5    | 100        | N.D.                         | N.D.                              |
| 26    | Fe(OAc) <sub>3</sub>                    | 20 | Neat    | -        | 0.5    | 100        | N.D.                         | N.D.                              |
| 27    | NiCl <sub>2</sub>                       | 20 | Neat    | -        | 0.5    | 100        | N.D.                         | N.D.                              |
| 28    | In(OTf) <sub>3</sub>                    | 20 | Neat    | -        | 0.5    | 100        | N.D.                         | N.D.                              |
| 29    | Vo(OAc) <sub>2</sub>                    | 20 | Neat    | -        | 0.5    | 100        | N.D.                         | N.D.                              |
| 30    | Yb(OTf) <sub>2</sub>                    | 20 | Neat    | -        | 0.5    | 100        | N.D.                         | N.D.                              |
| 31    | Sc(OTf) <sub>3</sub>                    | 20 | Neat    | -        | 0.5    | 100        | N.D.                         | N.D.                              |
| 32    | Zr(OAc) <sub>4</sub>                    | 20 | Neat    | -        | 0.5    | 100        | N.D.                         | N.D.                              |
| 33    | RuCl <sub>2</sub>                       | 20 | Neat    | -        | 0.5    | 100        | N.D.                         | N.D.                              |
| 34    | FeCl <sub>2</sub>                       | 20 | Neat    | -        | 0.5    | 100        | N.D.                         | N.D.                              |
| 35    | FeCl <sub>3</sub>                       | 20 | Neat    | -        | 0.5    | 100        | N.D.                         | N.D.                              |
| 36    | ZnBr <sub>2</sub>                       | 30 | Neat    | -        | 0.5    | 100        | 28                           | 18                                |
| 37    | ZnBr <sub>2</sub>                       | 20 | Neat    | -        | 0.5    | 100        | 70                           | 8                                 |
| 38    | ZnBr <sub>2</sub>                       | 10 | Neat    | -        | 0.5    | 100        | 74                           | N.D.                              |
| 39    | ZnBr <sub>2</sub>                       | 5  | Neat    | -        | 0.5    | 100        | 70                           | trace                             |
| 40    | ZnBr <sub>2</sub>                       | 20 | Neat    | -        | 0.25   | 100        | 58                           | N.D.                              |
| 41    | ZnBr <sub>2</sub>                       | 20 | Neat    | -        | 0.5    | 100        | 70                           | N.D.                              |
| 42    | ZnBr <sub>2</sub>                       | 20 | Neat    | -        | 1.0    | 100        | 71                           | N.D.                              |
| 43    | ZnBr <sub>2</sub>                       | 20 | Neat    | -        | 1.5    | 100        | 48                           | N.D.                              |
| 44    | ZnBr <sub>2</sub>                       | 20 | Neat    | -        | 0.5    | 50         | 15                           | N.D.                              |
| 45    | ZnBr <sub>2</sub>                       | 20 | Neat    | -        | 0.5    | 80         | 53                           | N.D.                              |
| 46    | ZnBr <sub>2</sub>                       | 20 | Neat    | -        | 0.5    | 100        | 71                           | 8                                 |
| 47    | ZnBr <sub>2</sub>                       | 20 | Neat    | -        | 0.5    | 120        | 28                           | 12                                |

<sup>[a]</sup> <sup>1</sup>H-NMR yield; <sup>[b]</sup> Isolated yield

## 2.2 Optimization of the reaction conditions for phenylacetylene (Table S2)

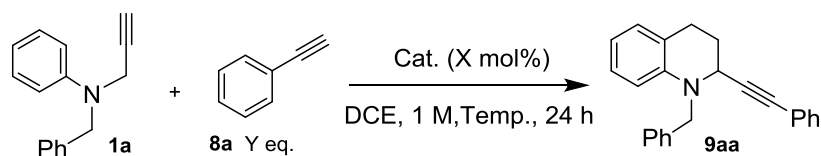

| Entry | Cat.                  | X  | Y | Temp. [°C] | <b>9aa</b> <sup>[a]</sup> (%) | Rec. <b>1a</b> <sup>[a]</sup> (%) |
|-------|-----------------------|----|---|------------|-------------------------------|-----------------------------------|
| 1     | CuBr                  | 20 | 3 | 120        | 75                            | N.D.                              |
| 2     | CuI                   | 20 | 3 | 120        | 64                            | N.D.                              |
| 3     | CuBr <sub>2</sub>     | 20 | 3 | 120        | 41                            | N.D.                              |
| 4     | CuCl                  | 20 | 3 | 120        | 31                            | 51                                |
| 5     | Cu(OAc) <sub>2</sub>  | 20 | 3 | 120        | 43                            | 15                                |
| 6     | CuSO <sub>4</sub>     | 20 | 3 | 120        | 17                            | 72                                |
| 7     | Cu(OTf)               | 20 | 3 | 120        | 16                            | 9                                 |
| 8     | Cu(OTf) <sub>2</sub>  | 20 | 3 | 120        | 12                            | 4                                 |
| 9     | ZnBr <sub>2</sub>     | 20 | 3 | 120        | <b>78</b>                     | N.D.                              |
| 10    | Zn(OAc) <sub>2</sub>  | 20 | 3 | 120        | 26                            | N.D.                              |
| 11    | ZnI <sub>2</sub>      | 20 | 3 | 120        | N.D.                          | N.D.                              |
| 12    | Pd(OAc) <sub>2</sub>  | 20 | 3 | 120        | N.D.                          | 4                                 |
| 13    | Sc(OTf) <sub>2</sub>  | 20 | 3 | 120        | 48                            | 11                                |
| 14    | Yb(OTf) <sub>3</sub>  | 20 | 3 | 120        | 18                            | 16                                |
| 15    | RuCl <sub>2</sub>     | 20 | 3 | 120        | N.D.                          | 5                                 |
| 16    | FeCl <sub>2</sub>     | 20 | 3 | 120        | N.D.                          | 87                                |
| 17    | FeCl <sub>3</sub>     | 20 | 3 | 120        | N.D.                          | 91                                |
| 18    | Fe(OAc) <sub>3</sub>  | 20 | 3 | 120        | N.D.                          | 85                                |
| 19    | InI <sub>3</sub>      | 20 | 3 | 120        | N.D.                          | N.D.                              |
| 20    | Ph <sub>3</sub> PAuCl | 20 | 3 | 120        | N.D.                          | N.D.                              |
| 21    | In(OTf) <sub>3</sub>  | 20 | 3 | 120        | N.D.                          | 17                                |
| 22    | ZnBr <sub>2</sub>     | 20 | 3 | 120        | 80(80) <sup>[b]</sup>         | N.D.                              |
| 23    | ZnBr <sub>2</sub>     | 15 | 3 | 120        | 38                            | N.D.                              |
| 24    | ZnBr <sub>2</sub>     | 10 | 3 | 120        | 35                            | N.D.                              |
| 25    | ZnBr <sub>2</sub>     | 5  | 3 | 120        | 22                            | N.D.                              |
| 26    | ZnBr <sub>2</sub>     | 20 | 1 | 120        | 39                            | N.D.                              |
| 27    | ZnBr <sub>2</sub>     | 20 | 2 | 120        | 66                            | N.D.                              |
| 28    | ZnBr <sub>2</sub>     | 20 | 3 | 120        | 75                            | N.D.                              |
| 29    | ZnBr <sub>2</sub>     | 20 | 4 | 120        | 76                            | N.D.                              |
| 30    | ZnBr <sub>2</sub>     | 20 | 3 | 120        | 78                            | N.D.                              |
| 31    | ZnBr <sub>2</sub>     | 20 | 3 | 80         | N.D.                          | 61                                |
| 32    | ZnBr <sub>2</sub>     | 20 | 3 | 50         | N.D.                          | 84                                |
| 33    | ZnBr <sub>2</sub>     | 20 | 3 | r.t        | N.D.                          | 99                                |

<sup>[a]</sup> <sup>1</sup>H-NMR yield; <sup>[b]</sup> Isolated yield

### 3. The DFT study reported by Zhang *et al.* (Scheme S1, Scheme S2, Scheme S3)

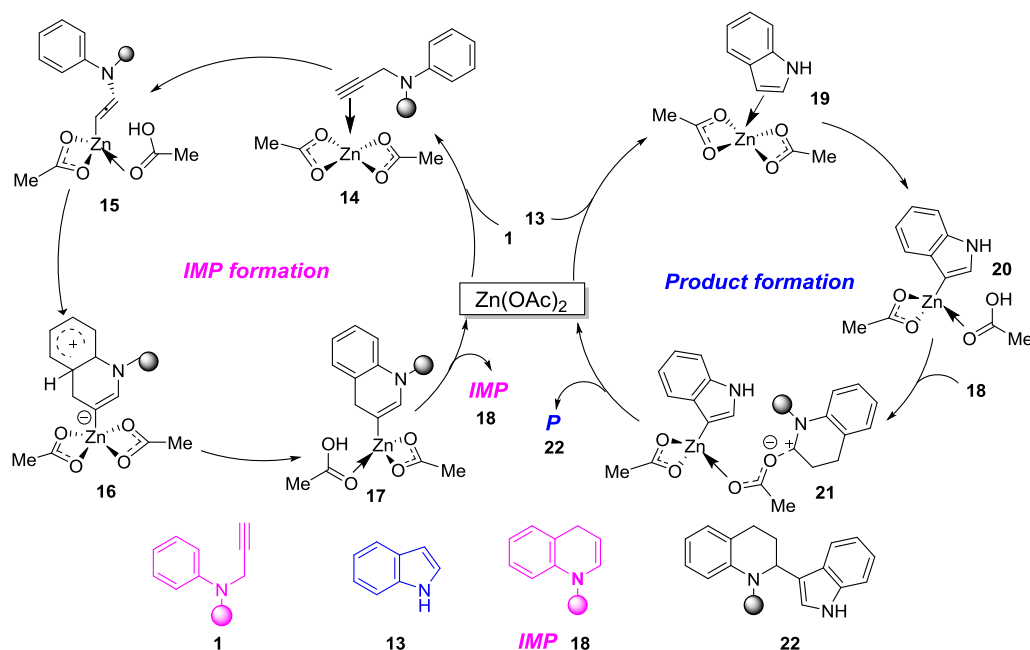

**Scheme S1.** Catalytic cycle proposed on the basis of calculations by Zhang *et al.*

The DFT study reported an alternative reaction mechanism via an allene intermediate by Zhang *et al.* was summarized in Scheme S1<sup>[1]</sup>. The proposed catalytic cycle consists of two discrete subcycles: transformation of **1** into **18** (**IMP**) and its further reaction with **2** to give the final product **22** (**P**). The generation of **IMP** occurs through sequential C(sp<sup>3</sup>)-H activation (**14** → **15**), cyclization/phenyl C(sp<sup>2</sup>)-H activation (**14** → **15** → **16**) and protonation (**17** → **IMP**) steps. The transformation from **IMP** into **P** is achieved by undergoing indole C(sp<sup>2</sup>)-H activation (**19** → **20**), protonation of **IMP** (**20** → **21**), and nucleophilic addition (**21** → **P**) steps successively. All three C–H bonds are activated with the assistance of an acetate ligand.

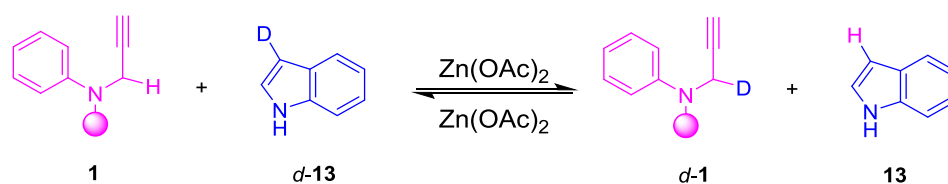

**Scheme S2.** The **1** and *d*-**13** are in equilibrium with *d*-**1** and **13**

Zhang *et al.* suggested that the generation of the deuterated **1** (*d*-**1**) and **13** via the allene intermediate from the initial reactants **1** and *d*-**13** in equilibrium (Scheme S2).

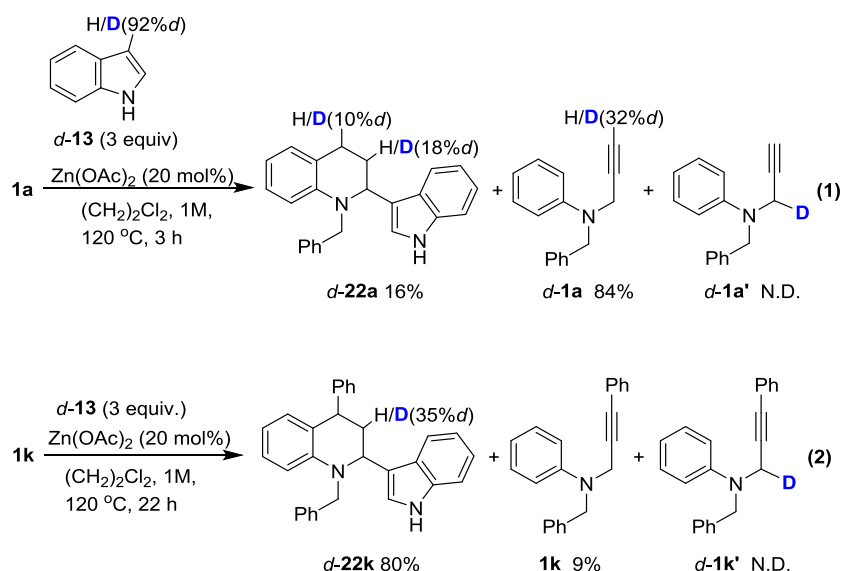

**Scheme S3.** Deuterium labeling study for the reaction of *N*-propargylanilines and *d*-indoles.

In order to verify the possibility of the allene intermediate, we conducted deuterium labeling experiments (Scheme S3). *N*-benzyl-*N*-(2-propynyl)aniline (**1a**) was treated with the deuterated indole **d-13** in the presence of  $\text{Zn(OAc)}_2$  in 1,2-dichloroethane, and the reaction was quenched after 3 h (Scheme S3, eq 1). Although Zhang et al. suggested the deuterated **1a** (**d-1a'**) was supposed to be generated via the allene intermediate (Scheme S1), however **d-1a'** was not detected in our reaction mixture. Interestingly, **d-1a**, in which the terminal alkyne hydrogen was deuterated, was detected in 84% yield, revealing that terminal alkyne hydrogens were readily exchanged with the indole hydrogen under the conditions. Which meant that under this catalytic condition, the hydrogen atom at the C3 position of indole exchange with the hydrogen atom at the terminal alkyne of **1a**, rather than the methylene hydrogen atom of **1a**. Similarly, the reaction of **1k** with indole **d-13** was carried out in the presence of  $\text{Zn(OAc)}_2$  in 1,2-dichloroethane for 22 hours (Scheme S3, eq 2), and only 9% of **1k** was recovered without **d-1k'**. The above experimental results show that the redox CDC reaction is caused by the cyclization reaction, not the activation of methylene  $\text{C(sp}^3\text{)-H}$  bond via the allene intermediate.

## 4. Representative procedure

### 4.1 Reaction of *N*-propargylaniline **1** with nitromethane **2** (Table 2)

#### Reaction of *N*-benzyl-*N*-(2-propynyl)aniline **1a** with nitromethane **2a**

*N*-benzyl-*N*-(2-propynyl)aniline (**1a**), ZnBr<sub>2</sub> (5.6 mg, 0.025 mmol) in nitromethane (**2**) (0.5 ml) were stirred at 100 °C for 24 hours in a closed vial tube protected with N<sub>2</sub> (Table 1, entry 1). The resulting mixture was concentrated under reduced pressure. The residue was purified by silica gel column chromatography (petroleum ether : ethyl acetate = 30:1 (v/v)) to give *N*-benzyl-2-nitromethyl-1,2,3,4-tetrahydroquinoline (**3a**, 45.8 mg, 65% yield) as yellow solid.

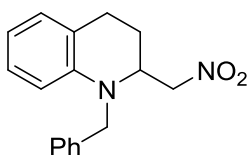

#### *N*-Benzyl-2-nitromethyl-1,2,3,4-tetrahydroquinoline **3a**

Light yellow solid, 65% yield (45.8 mg); <sup>1</sup>H-NMR (400 MHz, CDCl<sub>3</sub>): δ 7.30 (t, *J* = 7.3 Hz, 2H), 7.23 (dd, *J* = 14.1, 7.1 Hz, 3H), 7.04 (d, *J* = 7.4 Hz, 1H), 6.99 (t, *J* = 7.8 Hz, 1H), 6.67 (t, *J* = 7.3 Hz, 1H), 6.55 (d, *J* = 8.3 Hz, 1H), 4.62 (ABq, *J* = 16.9 Hz, 2H), 4.54-4.39 (m, 2H), 4.20 (td, *J* = 8.2, 3.7 Hz, 1H), 2.98-2.74 (m, 2H), 2.13-1.94 (m, 2H); <sup>13</sup>C-NMR (101 MHz, CDCl<sub>3</sub>): δ 142.9, 137.9, 129.4, 128.8, 127.5, 127.3, 126.4, 120.9, 117.5, 112.8, 76.2, 56.5, 54.4, 23.2, 22.9; HRMS (ESI) *m/z* Calcd for C<sub>17</sub>H<sub>19</sub>N<sub>2</sub>O<sub>2</sub> [M+H]<sup>+</sup> : 283.1446. Found: 283.1436.

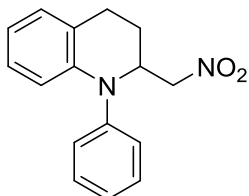

#### *N*-Phenyl-2-nitromethyl-1,2,3,4-tetrahydroquinoline **3b**

Light yellow oil; 61% yield (40.8 mg); <sup>1</sup>H-NMR (400 MHz, CDCl<sub>3</sub>): δ 7.36 (t, *J* = 7.8 Hz, 2H), 7.20-7.14 (m, 3H), 7.09 (d, *J* = 7.5 Hz, 1H), 6.96 (t, *J* = 7.7 Hz, 1H), 6.79 (t, *J* = 7.4 Hz, 1H), 6.62 (d, *J* = 8.2 Hz, 1H), 4.63-4.44 (m, 3H), 2.93-2.84 (m, 2H), 2.15 (ddd, *J* = 18.2, 10.1, 4.0 Hz, 1H), 1.99 (dt, *J* = 13.8, 2.8 Hz, 1H); <sup>13</sup>C-NMR (101 MHz, CDCl<sub>3</sub>): δ 147.1, 142.2, 129.5, 126.9, 125.9, 125.1, 123.2, 119.7, 118.4, 76.4, 57.7, 23.0, 22.9; HRMS (ESI) *m/z* Calcd for C<sub>16</sub>H<sub>17</sub>N<sub>2</sub>O<sub>2</sub> [M+H]<sup>+</sup> : 269.1290. Found: 269.1285.

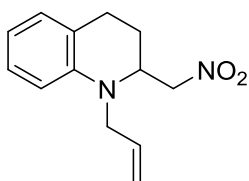

#### *N*-Allyl-2-nitromethyl-1,2,3,4-tetrahydroquinoline **3c**

Light yellow oil; 55% yield (31.9 mg); <sup>1</sup>H-NMR (400 MHz, CDCl<sub>3</sub>): δ 7.08 (t, *J* = 7.8 Hz, 1H), 7.03 (d, *J* = 7.3 Hz, 1H), 6.69 (t, *J* = 7.3 Hz, 1H), 6.63 (d, *J* = 8.3 Hz, 1H), 5.85 (ddt, *J* = 15.6, 10.0, 4.9 Hz, 1H),



5.24-5.16 (m, 2H), 4.53 (dd,  $J = 11.5, 5.6$  Hz, 1H), 4.43 (dd,  $J = 11.4, 8.6$  Hz, 1H), 4.15 (dq,  $J = 8.7, 3.9$  Hz, 1H), 4.04 (dd,  $J = 17.3, 4.9$  Hz, 1H), 3.88 (dd,  $J = 17.2, 4.8$  Hz, 1H), 2.82 (qt,  $J = 12.5, 6.7$  Hz, 2H), 1.99 (dd,  $J = 8.7, 4.2$  Hz, 2H);  $^{13}\text{C-NMR}$  (101 MHz,  $\text{CDCl}_3$ ):  $\delta$  142.6, 133.4, 129.3, 127.4, 121.0, 117.3, 116.8, 112.5, 76.4, 56.2, 53.4, 23.0, 23.0; HRMS (ESI)  $m/z$  Calcd for  $\text{C}_{13}\text{H}_{17}\text{N}_2\text{O}_2$   $[\text{M}+\text{H}]^+$ : 233.1290. Found: 233.1279.

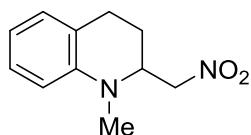

### ***N*-Methyl-2-nitromethyl -1,2,3,4-tetrahydroquinoline 3d**

Light yellow oil; 69% yield (35.5 mg);  $^1\text{H-NMR}$  (400 MHz,  $\text{CDCl}_3$ ):  $\delta$  7.12 (t,  $J = 7.7$  Hz, 1H), 7.02 (d,  $J = 7.3$  Hz, 1H), 6.70 (t,  $J = 7.4$  Hz, 1H), 6.60 (d,  $J = 8.2$  Hz, 1H), 4.54 (dd,  $J = 11.3, 5.8$  Hz, 1H), 4.40 (dd,  $J = 11.3, 8.0$  Hz, 1H), 4.12 (tt, 1H), 2.99 (s, 3H), 2.90-2.74 (m, 2H), 2.11-1.93 (m, 2H);  $^{13}\text{C-NMR}$  (101 MHz,  $\text{CDCl}_3$ ):  $\delta$  143.5, 129.1, 127.5, 120.9, 117.2, 111.5, 75.8, 57.8, 38.1, 23.3, 22.8; HRMS (ESI)  $m/z$  Calcd for  $\text{C}_{11}\text{H}_{15}\text{N}_2\text{O}_2$   $[\text{M}+\text{H}]^+$ : 207.1133. Found: 207.1125.

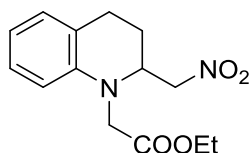

### **Ethyl 2-(2-(nitromethyl)-3,4-dihydroquinolin-1(2H)-yl)acetate 3e**

Light yellow oil; 40% yield (27.8 mg);  $^1\text{H-NMR}$  (400 MHz,  $\text{CDCl}_3$ ):  $\delta$  7.09-7.02 (m, 2H), 6.71 (t,  $J = 7.3$  Hz, 1H), 6.39 (d,  $J = 8.2$  Hz, 1H), 4.71 (dd,  $J = 12.3, 6.1$  Hz, 1H), 4.46 (dd,  $J = 12.3, 7.9$  Hz, 1H), 4.19 (q,  $J = 7.1$  Hz, 3H), 4.10 (s, 2H), 2.91-2.75 (m, 2H), 2.10 (ddt,  $J = 13.1, 10.7, 5.0$  Hz, 1H), 1.96 (ddt,  $J = 14.1, 5.8, 2.9$  Hz, 1H), 1.27 (t,  $J = 7.1$  Hz, 3H);  $^{13}\text{C-NMR}$  (101 MHz,  $\text{CDCl}_3$ ):  $\delta$  170.8, 142.0, 129.5, 127.5, 120.9, 117.9, 111.4, 76.7, 61.3, 57.4, 53.4, 23.0, 22.8; HRMS (ESI)  $m/z$  Calcd for  $\text{C}_{14}\text{H}_{18}\text{N}_2\text{O}_4$   $[\text{M}+\text{H}]^+$ : 279.1345. Found: 279.1342.

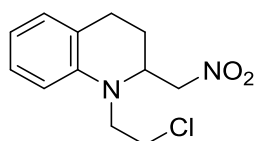

### ***N*-(2-chloroethyl)-2-(nitromethyl)-1,2,3,4-tetrahydroquinoline 3f**

Light yellow oil; 17% yield (10.8 mg);  $^1\text{H-NMR}$  (400 MHz,  $\text{CDCl}_3$ ):  $\delta$  7.15-7.00 (m, 2H), 6.73 (t,  $J = 7.4$  Hz, 1H), 6.62 (d,  $J = 8.3$  Hz, 1H), 4.49 (dd,  $J = 11.6, 7.0$  Hz, 1H), 4.39 (dd,  $J = 11.6, 7.1$  Hz, 1H), 4.27 (tdd,  $J = 7.0, 4.2, 2.8$  Hz, 1H), 3.90 (ddd,  $J = 15.2, 6.8, 4.1$  Hz, 1H), 3.69 (dt,  $J = 10.9, 7.4$  Hz, 1H), 3.59 (ddd,  $J = 11.0, 7.1, 4.1$  Hz, 1H), 3.47 (dt,  $J = 15.2, 7.6$  Hz, 1H), 2.80 (dd,  $J = 8.9, 3.5$  Hz, 2H), 2.12-2.01 (m, 1H), 1.96 (ddd,  $J = 10.7, 5.8, 3.1$  Hz, 1H);  $^{13}\text{C-NMR}$  (101 MHz,  $\text{CDCl}_3$ ):  $\delta$  141.3, 130.0, 127.6, 121.1, 117.9, 112.2, 76.4, 57.0, 52.9, 40.8, 22.7; HRMS (ESI)  $m/z$  Calcd for  $\text{C}_{12}\text{H}_{15}\text{ClN}_2\text{O}_2$   $[\text{M}+\text{H}]^+$ : 255.0895. Found: 255.0900.

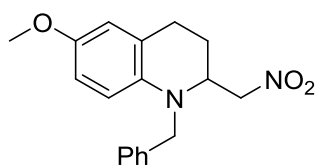

**N-Benzyl-2-nitromethyl-6-methoxy-1,2,3,4-tetrahydroquinoline 3g**

Light yellow oil; 47% yield (36.7 mg);  $^1\text{H-NMR}$  (400 MHz,  $\text{CDCl}_3$ ):  $\delta$  7.31 (t,  $J = 7.3$  Hz, 2H), 7.24 (t,  $J = 7.4$  Hz, 3H), 6.66-6.57 (td, 2H), 6.51 (d,  $J = 8.8$  Hz, 1H), 4.53 (ABq,  $J = 16.6$  Hz, 2H), 4.50-4.36 (m, 2H), 4.13 (tt,  $J = 7.3, 3.8$  Hz, 1H), 3.71 (s, 3H), 2.93-2.73 (m, 2H), 2.12-2.00 (m, 1H), 1.99-1.89 (m, 1H);  $^{13}\text{C-NMR}$  (101 MHz,  $\text{CDCl}_3$ ):  $\delta$  151.9, 138.2, 137.1, 128.7, 127.2, 126.6, 122.6, 114.8, 114.7, 113.0, 76.0, 56.3, 55.5, 23.2, 23.1; HRMS (ESI)  $m/z$  Calcd for  $\text{C}_{18}\text{H}_{21}\text{N}_2\text{O}_3$   $[\text{M}+\text{H}]^+$ : 313.1552. Found: 313.1543.

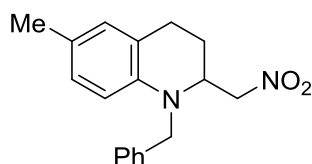

**N-Benzyl-2-nitromethyl-6-methyl-1,2,3,4-tetrahydroquinoline 3h**

Light yellow oil; 52% yield (38.5 mg);  $^1\text{H-NMR}$  (400 MHz,  $\text{CDCl}_3$ ):  $\delta$  7.31 (t,  $J = 7.2$  Hz, 2H), 7.28-7.20 (m, 4H), 6.89 (s, 1H), 6.83 (d,  $J = 8.3$  Hz, 1H), 6.48 (d,  $J = 8.3$  Hz, 1H), 4.60 (ABq,  $J = 16.8$  Hz, 2H), 4.54-4.42 (m, 2H), 4.19 (td,  $J = 8.1, 3.6$  Hz, 1H), 2.89 (ddd,  $J = 18.2, 12.7, 5.9$  Hz, 1H), 2.80 (ddd,  $J = 16.9, 5.6, 2.7$  Hz, 1H), 2.22 (s, 3H), 2.14-1.95 (m, 2H);  $^{13}\text{C-NMR}$  (101 MHz,  $\text{CDCl}_3$ ):  $\delta$  140.5, 138.0, 130.0, 128.7, 128.0, 127.2, 126.8, 126.5, 121.0, 113.1, 76.0, 56.5, 54.7, 23.2, 22.8, 20.2; HRMS (ESI)  $m/z$  Calcd for  $\text{C}_{18}\text{H}_{21}\text{N}_2\text{O}_2$   $[\text{M}+\text{H}]^+$ : 297.1603. Found: 297.1591.

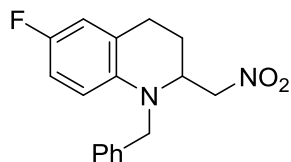

**N-Benzyl-2-nitromethyl-6-fluoro-1,2,3,4-tetrahydroquinoline 3i**

Light yellow oil; 44% yield (33.0 mg);  $^1\text{H-NMR}$  (400 MHz,  $\text{CDCl}_3$ ):  $\delta$  7.31 (t,  $J = 7.2$  Hz, 2H), 7.28-7.22 (m, 1H), 7.19 (d,  $J = 7.3$  Hz, 2H), 6.77 (dd,  $J = 8.9, 2.9$  Hz, 1H), 6.70 (td,  $J = 8.6, 3.0$  Hz, 1H), 6.46 (dd,  $J = 9.0, 4.7$  Hz, 1H), 4.56 (ABq,  $J = 16.8$  Hz, 2H), 4.52-4.38 (m, 2H), 4.19 (td,  $J = 8.2, 3.7$  Hz, 1H), 2.93-2.75 (m, 2H), 2.12-1.93 (m, 2H);  $^{13}\text{C-NMR}$  (101 MHz,  $\text{CDCl}_3$ ):  $\delta$  155.6 (d,  $^1J_{\text{C-F}} = 236.8$  Hz), 139.2 (d,  $^4J_{\text{C-F}} = 2.0$  Hz), 137.8, 128.9, 127.4, 126.5, 122.7 (d,  $^3J_{\text{C-F}} = 6.8$  Hz), 115.7 (d,  $^2J_{\text{C-F}} = 22.0$  Hz), 114.2 (d,  $^3J_{\text{C-F}} = 7.5$  Hz), 114.0 (d,  $^2J_{\text{C-F}} = 22.0$  Hz), 76.1, 56.4, 55.3, 23.2, 23.0; HRMS (ESI)  $m/z$  Calcd for  $\text{C}_{17}\text{H}_{18}\text{FN}_2\text{O}_2$   $[\text{M}+\text{H}]^+$ : 301.1352. Found: 301.1343.

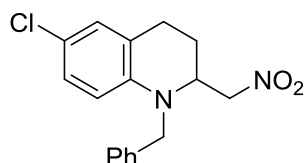

**N-Benzyl-2-nitromethyl-6-chloro-1,2,3,4-tetrahydroquinoline 3j**

Light yellow oil; 70% yield (55.3 mg);  $^1\text{H-NMR}$  (400 MHz,  $\text{CDCl}_3$ ):  $\delta$  7.32 (t,  $J = 7.2$  Hz, 2H), 7.28-7.23 (m, 1H), 7.18 (d,  $J = 7.4$  Hz, 2H), 7.02 (d,  $J = 2.4$  Hz, 1H), 6.93 (dd,  $J = 8.8, 2.5$  Hz, 1H), 6.45 (d,  $J = 8.8$  Hz, 1H), 4.60 (ABq,  $J = 17.0$  Hz, 2H), 4.55-4.39 (m, 2H), 4.22 (td,  $J = 8.2, 3.6$  Hz, 1H), 2.93-2.75 (m, 2H), 2.03 (ttt,  $J = 14.0, 7.1, 6.2, 3.8$  Hz, 2H);  $^{13}\text{C-NMR}$  (101 MHz,  $\text{CDCl}_3$ ):  $\delta$  141.4, 137.3, 128.9, 128.8, 127.4, 127.3, 126.3, 122.5, 122.2, 114.0, 76.0, 56.4, 54.5, 23.0, 22.8; HRMS (ESI)  $m/z$  Calcd for  $\text{C}_{17}\text{H}_{18}\text{ClN}_2\text{O}_2$   $[\text{M}+\text{H}]^+$ : 317.1057. Found: 317.1048.

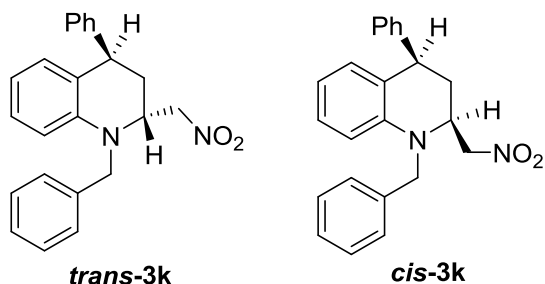

### ***N*-Benzyl-2-nitromethyl-4-phenyl-1,2,3,4-tetrahydroquinoline 3k**

The configurations were assigned by the coupling constant of 2-H and 4-H according to our previous reports.<sup>[4]</sup> *Trans/cis* isomer total yield: 15% (total weight: 13.4 mg), a mixture of *trans*-isomer and *cis*-isomer (*trans/cis* = 9:1) observed in the  $^1\text{H-NMR}$  spectra. *trans*-isomer: light yellow oil;  $^1\text{H-NMR}$  (400 MHz,  $\text{CDCl}_3$ ):  $\delta$  7.37-7.31 (m, 4H), 7.30-7.23 (m, 5H), 7.22-7.17 (m, 2H), 7.06-6.99 (m, 1H), 6.73 (d,  $J = 7.6$  Hz, 1H), 6.67-6.57 (m, 2H), 4.69 (ABq,  $J = 16.7$  Hz, 2H), 4.65-4.48 (m, 2H), 4.22 (tt,  $J = 7.5, 4.0$  Hz, 1H), 4.14 (dd,  $J = 12.1, 5.8$  Hz, 1H), 2.29 (ddd,  $J = 13.6, 12.3, 4.4$  Hz, 1H), 2.19 (ddd,  $J = 13.8, 5.8, 3.4$  Hz, 1H);  $^{13}\text{C-NMR}$  (101 MHz,  $\text{CDCl}_3$ ):  $\delta$  144.6, 143.3, 137.9, 130.0, 128.8, 128.7, 128.6, 127.8, 127.4, 126.8, 126.6, 125.0, 117.8, 113.4, 56.3, 55.0, 39.8, 33.4; HRMS (ESI)  $m/z$  Calcd for  $\text{C}_{23}\text{H}_{23}\text{N}_2\text{O}_2$   $[\text{M}+\text{H}]^+$ : 359.1760. Found: 359.1744.

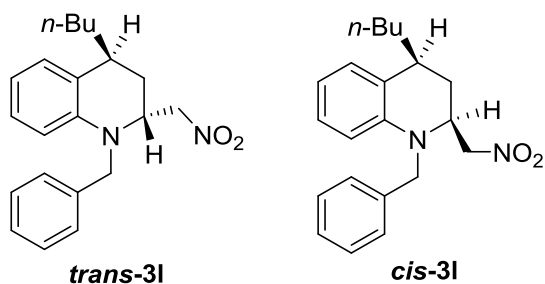

### ***N*-Benzyl-2-nitromethyl-4-*n*-Butyl-1,2,3,4-tetrahydroquinoline 3l**

The configurations were assigned by the coupling constant of 2-H and 4-H according to our previous reports.<sup>[4]</sup> *Trans/cis* isomer total yield: 22% (total weight: 18.6 mg), a mixture of *trans*-isomer and *cis*-isomer (*trans/cis* = 12:1) observed in the  $^1\text{H-NMR}$  spectra. *trans*-isomer: Light yellow oil;  $^1\text{H-NMR}$  (400 MHz,  $\text{CDCl}_3$ ):  $\delta$  7.33 (t,  $J = 7.2$  Hz, 2H), 7.25 (t,  $J = 10.1$  Hz, 4H), 7.18 (d,  $J = 7.5$  Hz, 1H), 7.02 (t,  $J = 7.8$  Hz, 1H), 6.74 (t,  $J = 7.4$  Hz, 1H), 6.59 (d,  $J = 8.2$  Hz, 1H), 4.62 (ABq,  $J = 16.9$  Hz, 2H), 4.56-4.39 (m, 2H), 4.15 (dq,  $J = 9.7, 4.9$  Hz, 1H), 2.86 (tt,  $J = 10.0, 5.1$  Hz, 1H), 2.06 (dt,  $J = 13.6, 5.0$  Hz, 1H), 1.91 (dtt,  $J = 14.4, 10.6, 4.8$  Hz, 2H), 1.34 (ddt,  $J = 23.5, 17.5, 8.6$  Hz, 4H), 0.93 (t,  $J = 6.6$  Hz, 3H);  $^{13}\text{C-NMR}$  (151 MHz,  $\text{CDCl}_3$ ):  $\delta$  143.5, 138.1, 128.8, 127.3, 127.3, 126.7, 126.6, 126.4, 117.9, 113.6, 77.1, 56.0, 55.1, 34.5, 32.0, 30.2, 28.6, 22.9, 14.1; HRMS (ESI)  $m/z$  Calcd for  $\text{C}_{21}\text{H}_{27}\text{N}_2\text{O}_2$   $[\text{M}+\text{H}]^+$ : 339.2068. Found: 339.1994.

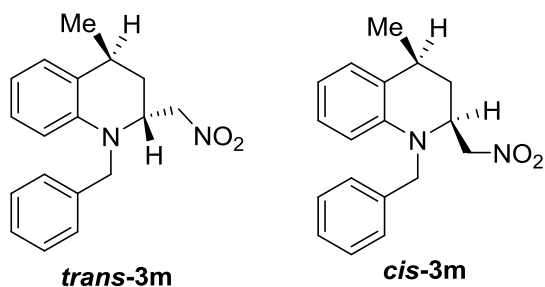

### *N*-Benzyl-2-nitromethyl-4-methyl-1,2,3,4-tetrahydroquinoline **3m**

The configurations were assigned by the coupling constant of 2-H and 4-H according to our previous reports.<sup>[4]</sup> *Trans/cis* isomer total yield: 41% (total weight: 30.2 mg), a mixture of *trans*-isomer and *cis*-isomer (*trans/cis* = 11:1) observed in the <sup>1</sup>H-NMR spectra. *trans*-isomer: light yellow oil; <sup>1</sup>H-NMR (400 MHz, CDCl<sub>3</sub>): δ 7.32 (t, *J* = 7.1 Hz, 2H), 7.28-7.19 (m, 4H), 7.01 (t, *J* = 7.7 Hz, 1H), 6.74 (t, *J* = 7.4 Hz, 1H), 6.55 (d, *J* = 8.2 Hz, 1H), 4.63 (ABq, *J* = 17.0 Hz, 2H), 4.57-4.45 (m, 2H), 4.21-4.14 (m, 1H), 2.96-3.05 (m, 1H), 2.01 (dt, *J* = 14.6, 3.3 Hz, 1H), 1.86 (td, *J* = 13.8, 13.3, 4.1 Hz, 1H), 1.40 (d, *J* = 6.6 Hz, 3H); <sup>13</sup>C-NMR (151 MHz, CDCl<sub>3</sub>): δ 142.7, 137.8, 128.8, 127.4, 127.3, 127.0, 126.5, 126.4, 117.7, 112.9, 76.8, 56.5, 32.7, 26.4, 20.6; HRMS (ESI) *m/z* Calcd for C<sub>18</sub>H<sub>21</sub>N<sub>2</sub>O<sub>2</sub> [M+H]<sup>+</sup>: 296.1603. Found: 297.1597.

## 4.2 Synthesis of important intermediates (Scheme 2)

### Synthesis of compound **4**

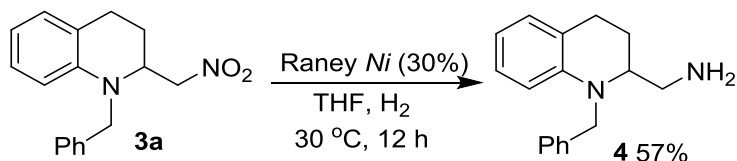

**3a** (60.0 mg, 0.21 mmol) and Raney nickel (18.0 mg, 30%) in THF (15.0 ml) were stirred at 30 ° C for 12 h in a two-necked flask protected by hydrogen balloon. The reaction solution was filtered into a flask (using celite) and concentrated under reduced pressure. The residue was purified by silica gel column chromatography (methanol/dichloromethane = 1:10 (v/v)) to give (1-benzyl-1,2,3,4-tetrahydroquinolin-2-yl)methanamine **4** (30.7 mg, 57% yield) as colorless oily liquid. <sup>1</sup>H-NMR (400 MHz, Methanol-d<sub>4</sub>): δ 7.35-7.19 (m, 5H), 7.01-6.90 (m, 2H), 6.63-6.55 (m, 2H), 4.70 (d, *J* = 16.9 Hz, 1H), 4.51 (d, *J* = 16.9 Hz, 1H), 3.54 (dq, *J* = 8.3, 5.1 Hz, 1H), 2.95-2.79 (m, 3H), 2.74 (dt, *J* = 16.3, 4.2 Hz, 1H), 2.07 (ddt, *J* = 12.1, 5.8, 3.3 Hz, 1H), 1.93 (ddt, *J* = 18.1, 11.6, 4.9 Hz, 1H); <sup>13</sup>C-NMR (101 MHz, Methanol-d<sub>4</sub>): δ 143.9, 139.0, 128.6, 128.2, 126.7, 126.6, 126.5, 116.5, 113.2, 57.5, 54.7, 48.2, 48.0, 47.8, 47.6, 47.4, 47.2, 47.0, 41.3, 22.9, 22.0; HRMS (ESI) *m/z* Calcd for C<sub>17</sub>H<sub>20</sub>N<sub>2</sub> [M+H]<sup>+</sup>: 253.1705. Found: 279.1699.

### Synthesis of compound **5**

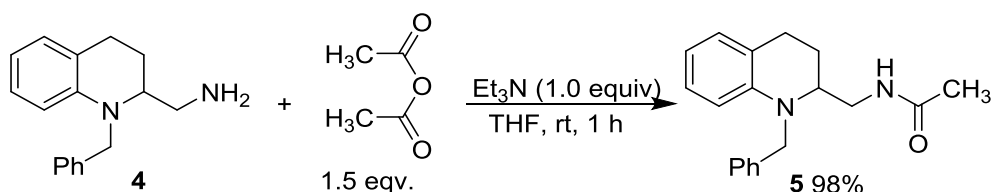

Et<sub>3</sub>N (35  $\mu$ l) and Acetic anhydride (0.29 mmol, 27  $\mu$ l) were added to a cold solution of compound **4** (0.2 mmol, 52.8 mg) in THF (1.5 mL), then the resulting mixture was stirred at room temperature for 1 h. The resulting mixture was concentrated under reduced pressure. The residue was dissolved in EtOAc, washed with a saturated aqueous solution of NaHCO<sub>3</sub> and brine, dried (Na<sub>2</sub>SO<sub>4</sub>), then concentrated under reduced pressure. The crude product was purified by silica gel flash chromatography (EtOAc) to give *N*-((1-benzyl-1,2,3,4-tetrahydroquinolin-2-yl)methyl)acetamide **5** (54.8 mg, 98% yield) as greyish solid. <sup>1</sup>H-NMR (400 MHz, CDCl<sub>3</sub>):  $\delta$  7.35-7.21 (m, 5H), 7.01 (t, *J* = 7.4 Hz, 2H), 6.64 (t, *J* = 7.3 Hz, 1H), 6.59 (d, *J* = 8.3 Hz, 1H), 5.62 (s, 1H), 4.62 (d, *J* = 17.0 Hz, 1H), 4.52 (d, *J* = 17.0 Hz, 1H), 3.51 (p, *J* = 6.2 Hz, 1H), 3.31 (q, *J* = 6.1 Hz, 2H), 2.91-2.81 (m, 1H), 2.75 (dt, *J* = 16.5, 4.5 Hz, 1H), 1.98-1.92 (m, 2H), 1.78 (s, 3H); <sup>13</sup>C-NMR (101 MHz, CDCl<sub>3</sub>):  $\delta$  170.3, 144.6, 139.4, 129.1, 128.8, 127.3, 127.0, 126.7, 122.0, 116.8, 113.1, 57.4, 55.8, 41.6, 23.9, 23.3, 23.2. Spectral data are in accordance with the reported data.<sup>[2]</sup>

### Synthesis of compound 6

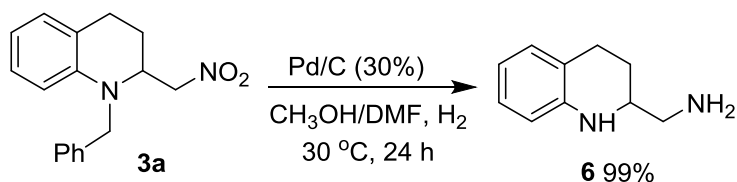

**3a** (0.38 mmol, 105.0 mg) and Pd/C (5% loading, 31.5 mg, 30%) in a mixed solvent of methanol/tetrahydrofuran (22 ml, v:v=10:1) were stirred at 30 °C for 24 h in a 100 ml reaction flask protected by hydrogen balloon. The resulting mixture was filtered into a flask (using celite) and concentrated under reduced pressure to give a crude product. The residue was purified by silica gel column chromatography (methanol: methylene chloride = 1:10 (v/v)) to give (1,2,3,4-tetrahydroquinolin-2-yl)methanamine **6** (60.5 mg, yield 99%) as white solid product. <sup>1</sup>H-NMR (400 MHz, Methanol-d<sub>4</sub>):  $\delta$  6.94 (t, *J* = 7.5 Hz, 2H), 6.61 (d, *J* = 7.6 Hz, 2H), 3.61 (dq, *J* = 8.7, 5.4 Hz, 1H), 3.06 (d, *J* = 5.7 Hz, 2H), 2.82 (dtt, *J* = 27.9, 10.6, 5.7 Hz, 2H), 1.99 (dtd, *J* = 15.1, 5.7, 3.7 Hz, 1H), 1.85-1.74 (m, 1H). Spectral data are in accordance with the reported data.<sup>[2]</sup>

### Synthesis of compound 7

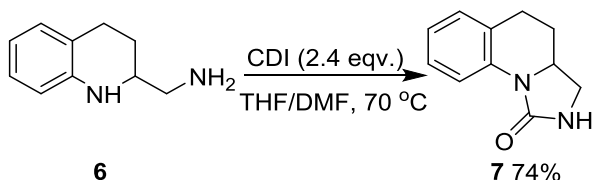

compound **6** (0.33 mmol, 54.3 mg) and CDI (1,1-Carbonyldiimidazole) (0.8 mmol, 2.4 equiv, 101.7 mg) in a mixed solution of THF/DMF (1.2 ml, v:v = 1:3) were stirred at 70 °C overnight in a closed vial tube protected with N<sub>2</sub>. The resulting mixture was concentrated under reduced pressure. The residue was purified by silica gel column chromatography (petroleum ether: ethyl acetate = 1:1 (v/v)) to give 3,3a,4,5-tetrahydroimidazo[1,5-a]quinolin-1(2H)-one **7** (45.9 mg, 74% yield) as white solid. <sup>1</sup>H-NMR (400 MHz, CDCl<sub>3</sub>):  $\delta$  8.26 (d, *J* = 8.3 Hz, 1H), 7.18 (t, *J* = 7.9 Hz, 1H), 7.09 (d, *J* = 7.5 Hz, 1H), 6.94 (t, *J* = 7.4 Hz, 1H), 4.78 (s, 1H), 4.09 (dtd, *J* = 11.1, 8.2, 2.7 Hz, 1H), 3.68 (t, *J* = 8.4 Hz, 1H), 3.22 (t, *J* = 8.1 Hz, 1H), 3.02-2.83 (m, 2H), 2.11 (ddd, *J* = 10.6, 5.8, 2.9 Hz, 1H), 1.89 (tt, *J* = 12.7, 6.3 Hz, 1H);

$^{13}\text{C}$ -NMR (101 MHz,  $\text{CDCl}_3$ ):  $\delta$  159.3, 136.7, 129.0, 126.7, 124.4, 122.1, 118.6, 54.6, 44.0, 27.3, 27.0; HRMS (ESI)  $m/z$  Calcd for  $\text{C}_{11}\text{H}_{12}\text{N}_2\text{O}$   $[\text{M}+\text{H}]^+$ : 189.1022. Found: 189.1030.

### 4.3 Reaction of *N*-propargylaniline **1** with phenylacetylene **8** (Table 4)

#### Reaction of *N*-Benzyl-*N*-(2-propynyl)aniline **1a** with phenylacetylene **8**

*N*-benzyl-*N*-(2-propynyl)aniline (**1a**),  $\text{ZnBr}_2$  (11.3 mg, 0.05 mmol) and phenylacetylene (**8a**) (0.75 mmol, 81  $\mu\text{l}$ ) in 1,2-dichloroethane (0.25 ml) were stirred at 120  $^\circ\text{C}$  for 24 hours in a closed vial tube protected with  $\text{N}_2$  (Table 2, entry 1). The resulting mixture was concentrated under reduced pressure. The residue was purified by silica gel column chromatography (petroleum ether : eluent ethyl acetate= 30:1 (v/v)) to give *N*-benzyl-2-ethynylbenzene-1,2,3,4-tetrahydroquinoline **9aa** (64.7 mg, 80% yield) as light yellow oil.

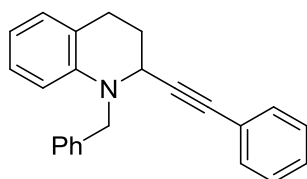

#### *N*-Benzyl-2-ethynylbenzene-1,2,3,4-tetrahydroquinoline **9aa**

Light yellow oil; 80% yield (64.7 mg);  $^1\text{H}$ -NMR (400 MHz,  $\text{CDCl}_3$ ):  $\delta$  7.33 (d,  $J$  = 6.8 Hz, 6H), 7.29-7.21 (m, 4H), 7.01 (dd,  $J$  = 18.4, 7.7 Hz, 2H), 6.64 (t,  $J$  = 7.3 Hz, 1H), 6.54 (d,  $J$  = 8.2 Hz, 1H), 4.71-4.60 (ABq,  $J$  = 17.0 Hz, 2H), 4.47 (t,  $J$  = 3.5 Hz, 1H), 3.26 (dt,  $J$  = 16.6, 8.7 Hz, 1H), 2.78 (d,  $J$  = 15.9 Hz, 1H), 2.41-2.08 (m, 2H);  $^{13}\text{C}$ -NMR(101 MHz,  $\text{CDCl}_3$ ):  $\delta$  144.2, 138.7, 131.7, 128.8, 128.6, 128.2, 128.0, 127.2, 126.8, 126.7, 123.0, 122.2, 116.7, 111.8, 89.2, 83.3, 53.8, 27.8, 24.9; HRMS (ESI)  $m/z$  Calcd for  $\text{C}_{24}\text{H}_{21}\text{N}$   $[\text{M}+\text{H}]^+$ : 324.1754. Found: 324.1740.

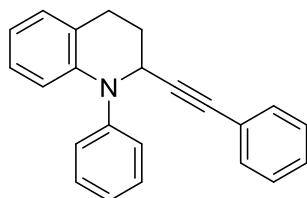

#### *N*-Phenyl-2-ethynylbenzene-1,2,3,4-tetrahydroquinoline **9ba**

Light yellow oil; 51% yield (39.4 mg);  $^1\text{H}$ -NMR (400 MHz,  $\text{CDCl}_3$ ):  $\delta$  7.44-7.38 (m, 4H), 7.33 (dd,  $J$  = 6.7, 3.1 Hz, 2H), 7.28-7.23 (m, 4H), 7.08 (d,  $J$  = 7.5 Hz, 1H), 6.92 (t,  $J$  = 7.5 Hz, 1H), 6.70 (t,  $J$  = 7.3 Hz, 1H), 6.58 (d,  $J$  = 8.3 Hz, 1H), 4.74 (t,  $J$  = 3.7 Hz, 1H), 3.33 (ddd,  $J$  = 17.2, 12.2, 5.9 Hz, 1H), 2.84 (dt,  $J$  = 16.3, 3.6 Hz, 1H), 2.28 (tddt,  $J$  = 12.8, 9.4, 6.3, 3.6 Hz, 2H);  $^{13}\text{C}$ -NMR (101 MHz,  $\text{CDCl}_3$ ):  $\delta$  146.8, 143.1, 131.6, 129.5, 129.3, 128.1, 128.0, 126.5, 125.2, 123.0, 122.7, 118.1, 115.2, 89.4, 83.9, 52.1, 27.7, 24.5; HRMS (ESI)  $m/z$  Calcd for  $\text{C}_{24}\text{H}_{21}\text{N}$   $[\text{M}+\text{H}]^+$ : 310.1597. Found: 310.1586.

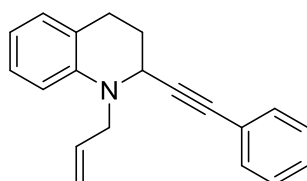

#### *N*-Allyl-2-ethynylbenzene-1,2,3,4-tetrahydroquinoline **9ca**

Light yellow oil; 58% yield (39.6 mg);  $^1\text{H-NMR}$  (400 MHz,  $\text{CDCl}_3$ ):  $\delta$  7.37 (dq,  $J = 8.1, 4.3, 3.9$  Hz, 2H), 7.26 (dt,  $J = 6.3, 2.9$  Hz, 3H), 7.06 (t,  $J = 7.8$  Hz, 1H), 7.00 (d,  $J = 7.3$  Hz, 1H), 6.66-6.59 (m, 2H), 5.94 (ddt,  $J = 17.1, 10.0, 4.9$  Hz, 1H), 5.33-5.15 (m, 2H), 4.44 (t,  $J = 3.8$  Hz, 1H), 4.12-3.99 (m, 2H), 3.20 (ddd,  $J = 16.4, 12.0, 5.2$  Hz, 1H), 2.74 (dt,  $J = 15.9, 3.8$  Hz, 1H), 2.17 (tddt,  $J = 17.1, 12.7, 8.9, 4.2$  Hz, 2H);  $^{13}\text{C-NMR}$  (101 MHz,  $\text{CDCl}_3$ ):  $\delta$  143.8, 134.0, 131.7, 128.8, 128.2, 128.0, 127.1, 123.1, 122.2, 116.5, 116.0, 111.7, 89.5, 83.1, 52.5, 49.8, 27.8, 24.9; HRMS (ESI)  $m/z$  Calcd for  $\text{C}_{20}\text{H}_{19}\text{N}$   $[\text{M}+\text{H}]^+$ : 274.1596. Found: 274.1591.

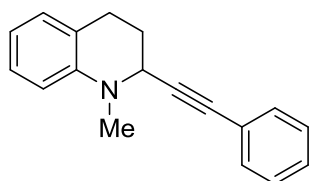

***N*-Methyl-2-ethynylbenzene-1,2,3,4-tetrahydroquinoline 9da**

Light yellow oil; 70% yield (43.2 mg);  $^1\text{H-NMR}$  (400 MHz,  $\text{CDCl}_3$ ):  $\delta$  7.39-7.33 (m, 2H), 7.28-7.22 (m, 3H), 7.10 (t,  $J = 7.7$  Hz, 1H), 7.00 (d,  $J = 7.3$  Hz, 1H), 6.68 (t,  $J = 8.0$  Hz, 2H), 4.35 (t,  $J = 3.8$  Hz, 1H), 3.19 (ddd,  $J = 16.8, 11.6, 6.1$  Hz, 1H), 3.01 (s, 3H), 2.74 (d,  $J = 16.1$  Hz, 1H), 2.21 (qt,  $J = 12.9, 6.8$  Hz, 2H);  $^{13}\text{C-NMR}$  (101 MHz,  $\text{CDCl}_3$ ):  $\delta$  144.9, 131.7, 128.7, 128.2, 128.0, 127.1, 123.0, 122.7, 117.3, 112.0, 88.4, 83.7, 51.9, 37.9, 27.7, 24.7; HRMS (ESI)  $m/z$  Calcd for  $\text{C}_{18}\text{H}_{17}\text{N}$   $[\text{M}+\text{H}]^+$ : 248.1439. Found: 248.1439.

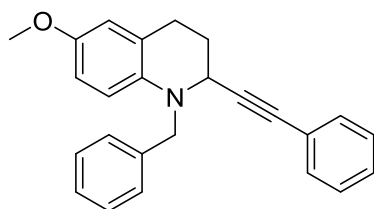

***N*-Benzyl-2-ethynylbenzene-6-Methoxy-1,2,3,4-tetrahydroquinoline 9ga**

Light yellow oil; 58% yield (51.2 mg);  $^1\text{H-NMR}$  (400 MHz,  $\text{CDCl}_3$ ):  $\delta$  7.39-7.30 (m, 6H), 7.25 (dd,  $J = 5.5, 2.1$  Hz, 4H), 6.66 (d,  $J = 2.8$  Hz, 1H), 6.59 (dd,  $J = 8.9, 2.8$  Hz, 1H), 6.49 (d,  $J = 8.9$  Hz, 1H), 4.64-4.51 (ABq,  $J = 16.5$  Hz, 2H), 4.40 (t,  $J = 3.8$  Hz, 1H), 3.72 (s, 3H), 3.48 (s, 2H), 3.24 (ddd,  $J = 16.5, 11.1, 6.1$  Hz, 1H), 2.81-2.71 (m, 1H), 2.22 (qt,  $J = 9.0, 5.3$  Hz, 2H);  $^{13}\text{C-NMR}$  (101 MHz,  $\text{CDCl}_3$ ):  $\delta$  151.5, 139.2, 138.8, 131.8, 128.6, 128.2, 128.1, 127.0, 126.9, 123.8, 123.1, 115.0, 113.2, 112.4, 89.2, 83.5, 55.7, 54.6, 50.4, 28.1, 25.3; HRMS (ESI)  $m/z$  Calcd for  $\text{C}_{25}\text{H}_{23}\text{NO}$   $[\text{M}+\text{H}]^+$ : 354.1858. Found: 354.1846.

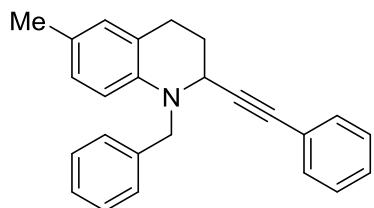

***N*-Benzyl-2-ethynylbenzene-6-Methyl-1,2,3,4-tetrahydroquinoline 9ha**

Light yellow oil; 52% yield (43.8 mg);  $^1\text{H-NMR}$  (400 MHz,  $\text{CDCl}_3$ ):  $\delta$  7.38-7.19 (m, 10H), 6.86 (s, 1H), 6.80 (d,  $J = 8.3$  Hz, 1H), 6.46 (d,  $J = 8.3$  Hz, 1H), 4.68-4.56 (ABq,  $J = 16.8$  Hz, 2H), 4.43 (t,  $J = 3.9$  Hz,

1H), 3.23 (dt,  $J = 16.6, 8.6$  Hz, 1H), 2.75 (dt,  $J = 16.1, 4.0$  Hz, 1H), 2.22 (d,  $J = 7.7$  Hz, 5H);  $^{13}\text{C}$ -NMR (101 MHz,  $\text{CDCl}_3$ ):  $\delta$  142.1 139.0, 131.7, 129.6, 128.5, 128.2, 128.0, 127.6, 126.8, 125.9, 123.1, 122.3, 112.0, 89.3, 83.4, 54.0, 50.3, 28.0, 24.9, 20.2; HRMS (ESI)  $m/z$  Calcd for  $\text{C}_{25}\text{H}_{23}\text{N}$   $[\text{M}+\text{H}]^+$ : 338.1909. Found: 338.1901.

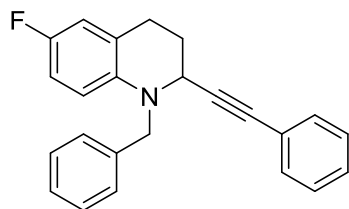

***N*-Benzyl-2-ethynylbenzene-6-fluoro-1,2,3,4-tetrahydroquinoline 9ia**

Light yellow oil; 61% yield (52.0 mg);  $^1\text{H}$ -NMR (400 MHz,  $\text{CDCl}_3$ ):  $\delta$  7.41-7.22 (m, 11H), 6.77 (dd,  $J = 8.9, 2.9$  Hz, 1H), 6.68 (td,  $J = 8.6, 3.0$  Hz, 1H), 6.44 (dd,  $J = 9.0, 4.7$  Hz, 1H), 4.64-4.54 (ABq,  $J = 16.7$  Hz, 2H), 4.42 (t,  $J = 3.9$  Hz, 1H), 3.24 (dt,  $J = 16.8, 8.9$  Hz, 1H), 2.76 (dt,  $J = 16.3, 4.1$  Hz, 1H), 2.26-2.18 (m, 2H);  $^{13}\text{C}$  NMR (101 MHz,  $\text{CDCl}_3$ ):  $\delta$  155.3 (d,  $^1J_{\text{C-F}} = 235.5$  Hz), 140.7 (d,  $^4J_{\text{C-F}} = 1.7$  Hz), 138.6, 131.7, 128.6, 128.2, 128.1, 127.0, 126.8, 123.9 (d,  $^3J_{\text{C-F}} = 6.8$  Hz), 122.9, 115.3 (d,  $^2J_{\text{C-F}} = 21.8$  Hz), 113.2 (d,  $^2J_{\text{C-F}} = 21.7$  Hz), 112.8 (d,  $^3J_{\text{C-F}} = 7.3$  Hz), 88.8, 83.7, 54.5, 50.3, 27.8, 25.1; HRMS (ESI)  $m/z$  Calcd for  $\text{C}_{24}\text{H}_{20}\text{FN}$   $[\text{M}+\text{H}]^+$ : 342.1658. Found: 342.1646.

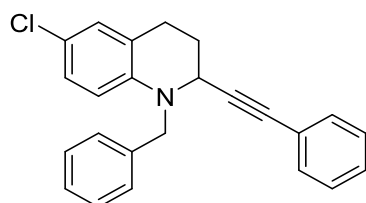

***N*-Benzyl-2-ethynylbenzene-6-chloro-1,2,3,4-tetrahydroquinoline 9ja**

Light yellow oil; 56% yield (50.0 mg);  $^1\text{H}$ -NMR (400 MHz,  $\text{CDCl}_3$ ):  $\delta$  7.38-7.23 (m, 11H), 7.00 (d,  $J = 2.4$  Hz, 1H), 6.92 (dd,  $J = 8.8, 2.5$  Hz, 1H), 6.44 (d,  $J = 8.8$  Hz, 1H), 4.66-4.58 (ABq,  $J = 16.9$  Hz, 2H), 4.45 (t,  $J = 3.6$  Hz, 1H), 3.23 (ddd,  $J = 16.9, 10.9, 6.4$  Hz, 1H), 2.75 (dt,  $J = 16.1, 3.8$  Hz, 1H), 2.26-2.17 (m, 2H);  $^{13}\text{C}$ -NMR (101 MHz,  $\text{CDCl}_3$ ):  $\delta$  135.8, 131.2, 124.7, 121.7, 121.5, 121.2, 120.0, 119.8, 119.6, 116.9, 115.8, 114.5, 106.1, 81.7, 70.3, 70.0, 69.7, 47.0, 43.3, 20.6, 17.8; HRMS (ESI)  $m/z$  Calcd for  $\text{C}_{24}\text{H}_{20}\text{ClN}$   $[\text{M}+\text{H}]^+$ : 358.1363. Found: 358.1357.

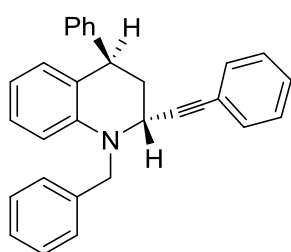

***trans*-9ka**

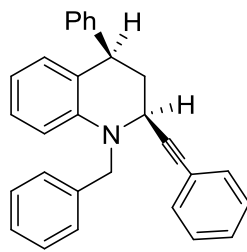

***cis*-9ka**

***N*-Benzyl-2-ethynylbenzene-4-phenyl-1,2,3,4-tetrahydroquinoline 9ka**

The configurations were assigned by the coupling constant of 2-H and 4-H according to our previous reports.<sup>[4]</sup> *Trans/cis* isomer total yield: 59% (total weight: 58.9 mg), a mixture of *trans*-isomer and *cis*-isomer (*trans/cis* = 8:1) observed in the  $^1\text{H}$ -NMR spectra. *trans*-isomer: light yellow oil;  $^1\text{H}$ -NMR (400



MHz, CDCl<sub>3</sub>):  $\delta$  7.42-7.31 (m, 8H), 7.26 (ddd,  $J = 11.4, 6.0, 1.8$  Hz, 7H), 7.05-6.99 (m, 1H), 6.69 (dt,  $J = 7.5, 1.2$  Hz, 1H), 6.63 (d,  $J = 8.3$  Hz, 1H), 6.57 (td,  $J = 7.5, 0.8$  Hz, 1H), 4.79-4.64 (ABq,  $J = 16.8$  Hz, 2H), 4.47 (dt,  $J = 9.1, 5.0$  Hz, 2H), 2.52-2.39 (m, 2H); <sup>13</sup>C-NMR (101 MHz, CDCl<sub>3</sub>):  $\delta$  145.0, 144.5, 138.7, 131.7, 129.4, 128.9, 128.6, 128.5, 128.2, 128.1, 127.5, 126.9, 126.9, 126.5, 125.4, 122.9, 116.9, 112.1, 89.1, 83.9, 54.0, 49.5, 41.3, 36.8; HRMS (ESI)  $m/z$  Calcd for C<sub>30</sub>H<sub>26</sub>N [M+Na]<sup>+</sup>:422.1885. Found: 422.1879.

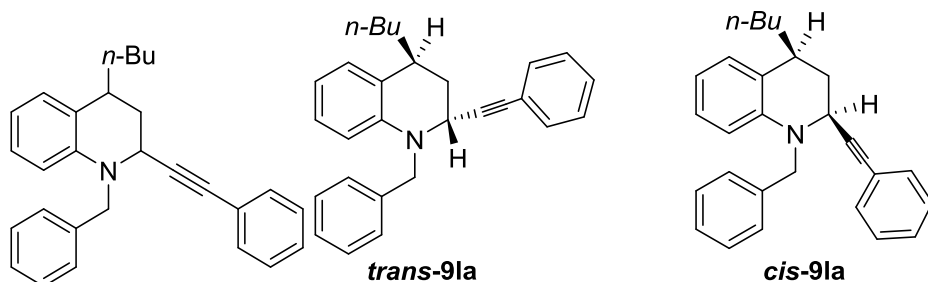

#### ***N*-Benzyl-2-ethynylbenzene-4-*n*-butyl-1,2,3,4-tetrahydroquinoline 9la**

The configurations were assigned by the coupling constant of 2-H and 4-H according to our previous reports.<sup>[4]</sup> *Trans/cis* isomer total yield: 67% (total weight: 63.5 mg), a mixture of *trans*-isomer and *cis*-isomer (*trans/cis* = 5:1) observed in the <sup>1</sup>H-NMR spectra. *trans*-isomer: light yellow oil; <sup>1</sup>H-NMR (400 MHz, CDCl<sub>3</sub>):  $\delta$  7.32-7.13 (m, 10H), 7.06 (d,  $J = 7.5$  Hz, 1H), 6.96-6.89 (m, 1H), 6.64-6.57 (m, 1H), 6.50 (dd,  $J = 7.6, 4.4$  Hz, 1H), 4.72-4.50 (ABq,  $J = 16.8$  Hz, 2H), 4.45-4.35 (m, 1H), 3.00 (tt,  $J = 8.8, 4.9$  Hz, 1H), 2.32-2.12 (m, 1H), 2.01 (ddd,  $J = 12.9, 8.3, 4.4$  Hz, 1H), 1.81 (ddt,  $J = 15.3, 10.2, 5.2$  Hz, 1H), 1.52 (dtt,  $J = 13.2, 8.6, 3.5$  Hz, 1H), 1.43-1.26 (m, 4H), 0.90-0.82 (m, 3H); <sup>13</sup>C-NMR (101 MHz, CDCl<sub>3</sub>):  $\delta$  144.25, 138.93, 131.61, 128.48, 128.16, 127.99, 127.50, 127.17, 127.02, 126.87, 126.76, 126.58, 123.03, 116.80, 112.36, 89.58, 83.57, 53.85, 48.82, 36.27, 34.32, 33.93, 33.61, 28.86, 22.92, 14.08; HRMS (ESI)  $m/z$  Calcd for C<sub>28</sub>H<sub>30</sub>N [M+H]<sup>+</sup>: 380.2378. Found: 380.2371.

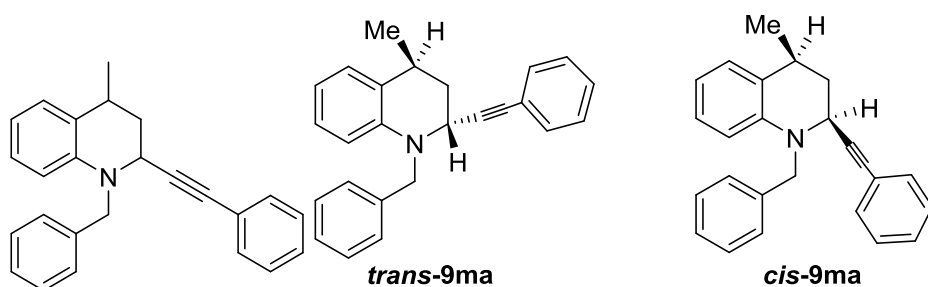

#### ***N*-Benzyl-2-ethynylbenzene-4-methyl-1,2,3,4-tetrahydroquinoline 9ma**

The configurations were assigned by the coupling constant of 2-H and 4-H according to our previous reports.<sup>[4]</sup> *Trans/cis* isomer total yield: 51% (total weight: 43.0 mg), a mixture of *trans*-isomer and *cis*-isomer (*trans/cis* = 5:1) observed in the <sup>1</sup>H-NMR spectra. *trans*-isomer: light yellow oil; <sup>1</sup>H-NMR (400 MHz, CDCl<sub>3</sub>):  $\delta$  7.33-7.22 (m, 5H), 7.18 (dt,  $J = 9.2, 3.9$  Hz, 5H), 7.10 (dt,  $J = 7.6, 1.2$  Hz, 1H), 6.96-6.89 (m, 1H), 6.63 (dtd,  $J = 11.5, 7.4, 1.0$  Hz, 1H), 6.48-6.44 (m, 5H), 4.67-4.53 (ABq,  $J = 17.0$  Hz, 5H), 4.44-4.36 (m, 1H), 3.23 (dq,  $J = 11.6, 6.8, 5.8$  Hz, 1H), 2.16 (dt,  $J = 12.9, 4.5$  Hz, 1H), 2.03-1.88 (m, 1H), 1.34 (d,  $J = 6.8$  Hz, 14H); <sup>13</sup>C-NMR (101 MHz, CDCl<sub>3</sub>):  $\delta$  143.90, 138.77, 131.70, 128.58, 128.18, 128.06, 127.33, 127.10, 126.83, 126.73, 126.53, 123.03, 117.37, 116.83, 112.80, 111.86, 89.65, 83.49,

53.89, 49.58, 36.60, 28.14, 20.37; HRMS (ESI)  $m/z$  Calcd for  $C_{25}H_{24}N$   $[M+H]^+$ : 338.1909. Found: 338.1906.

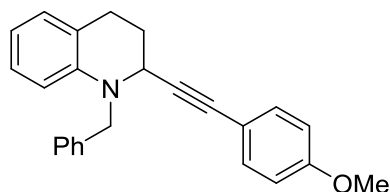

***N*-Benzyl-2-(4-methoxyphenylethynyl)-1,2,3,4-tetrahydroquinoline 9ab**

Light yellow oil; 58% yield (51.2mg);  $^1H$ -NMR (400 MHz,  $CDCl_3$ ):  $\delta$  7.36-7.28 (m, 5H), 7.27-7.21 (m, 2H), 7.04-6.95 (m, 2H), 6.80-6.76 (m, 2H), 6.63 (t,  $J = 7.3$  Hz, 1H), 6.53 (d,  $J = 8.2$  Hz, 1H), 4.70-4.60 (ABq,  $J = 17.0$  Hz, 2H), 4.45 (t,  $J = 3.7$  Hz, 1H), 3.77 (s, 3H), 3.25 (dt,  $J = 16.5, 9.0$  Hz, 1H), 2.77 (dt,  $J = 15.9, 3.9$  Hz, 1H), 2.24-2.18 (m, 2H);  $^{13}C$ -NMR (101 MHz,  $CDCl_3$ ):  $\delta$  159.4, 144.3, 138.8, 133.1, 128.8, 128.5, 127.2, 126.8, 126.7, 122.3, 116.6, 115.1, 113.8, 111.8, 87.8, 83.2, 55.2, 53.8, 50.4, 25.0; HRMS (ESI)  $m/z$  Calcd for  $C_{25}H_{24}NO$   $[M+H]^+$ : 354.1858. Found: 354.1855.

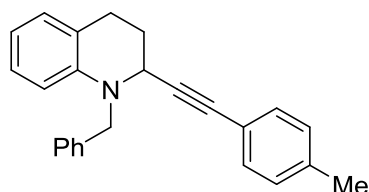

***N*-Benzyl-2-(4-methylphenylethynyl)-1,2,3,4-tetrahydroquinoline 9ac**

Light yellow oil; 75% yield (63.2 mg);  $^1H$ -NMR (400 MHz,  $CDCl_3$ ):  $\delta$  7.32 (q,  $J = 7.6$  Hz, 4H), 7.23 (d,  $J = 6.7$  Hz, 3H), 7.10-6.95 (m, 4H), 6.64 (t,  $J = 7.3$  Hz, 1H), 6.54 (d,  $J = 8.2$  Hz, 1H), 4.70-4.60 (ABq,  $J = 16.9$  Hz, 2H), 4.45 (t,  $J = 3.8$  Hz, 1H), 3.25 (dt,  $J = 16.5, 8.8$  Hz, 1H), 2.77 (dt,  $J = 16.1, 3.6$  Hz, 1H), 2.31 (s, 3H), 2.22 (dq,  $J = 7.0, 3.8$  Hz, 2H);  $^{13}C$ -NMR (101 MHz,  $CDCl_3$ ):  $\delta$  144.3, 138.9, 138.1, 131.6, 128.9, 128.9, 128.6, 127.2, 126.8, 126.7, 122.3, 120.0, 116.7, 111.9, 88.6, 83.5, 53.8, 50.4, 27.9, 25.0, 21.4; HRMS (ESI)  $m/z$  Calcd for  $C_{25}H_{24}N$   $[M+H]^+$ : 338.1909. Found: 338.1905.

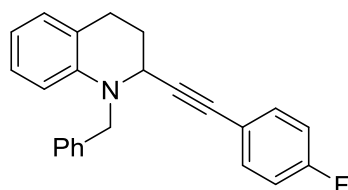

***N*-Benzyl-2-(4-fluorophenylethynyl)-1,2,3,4-tetrahydroquinoline 9ad**

Light yellow oil; 73% yield (62.2 mg);  $^1H$ -NMR (400 MHz,  $CDCl_3$ ):  $\delta$  7.36-7.27 (m, 6H), 6.98 (dt,  $J = 28.0, 8.2$  Hz, 4H), 6.65 (t,  $J = 7.3$  Hz, 1H), 6.54 (d,  $J = 8.2$  Hz, 1H), 4.70-4.59 (ABq,  $J = 16.9$  Hz, 2H), 4.45 (t,  $J = 3.9$  Hz, 1H), 3.24 (dt,  $J = 16.6, 8.6$  Hz, 1H), 2.79 (dt,  $J = 16.1, 3.7$  Hz, 1H), 2.22 (dt,  $J = 8.3, 4.0$  Hz, 2H);  $^{13}C$ -NMR (101 MHz,  $CDCl_3$ ):  $\delta$  162.3 (d,  $^1J_{C-F} = 249.3$  Hz), 144.2, 138.7, 133.6 (d,  $^3J_{C-F} = 8.3$  Hz), 128.9, 128.6, 127.2, 126.9, 126.7, 122.2, 119.1 (d,  $^4J_{C-F} = 3.5$  Hz), 116.8, 115.4 (d,  $^2J_{C-F} = 22.0$  Hz), 111.9, 89.0, 82.4, 53.9, 50.3, 27.8, 25.0; HRMS (ESI)  $m/z$  Calcd for  $C_{24}H_{21}FN$   $[M+H]^+$ : 342.1658. Found: 342.1643.

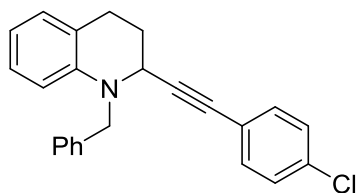

***N*-Benzyl-2-(4-chlorophenylethynyl)-1,2,3,4-tetrahydroquinoline 9ae**

Light yellow oil; 60% yield (53.6 mg);  $^1\text{H-NMR}$  (400 MHz,  $\text{CDCl}_3$ ):  $\delta$  7.36-7.28 (m, 5H), 7.27-7.21 (m, 7H), 7.01 (dd,  $J = 16.8, 7.7$  Hz, 3H), 6.65 (t,  $J = 7.3$  Hz, 1H), 6.54 (d,  $J = 8.2$  Hz, 1H), 4.70-4.58 (ABq,  $J = 16.9$  Hz, 2H), 4.45 (t,  $J = 4.1$  Hz, 1H), 3.23 (dt,  $J = 16.6, 8.6$  Hz, 1H), 2.84-2.73 (m, 2H), 2.22 (dt,  $J = 8.4, 4.1$  Hz, 2H);  $^{13}\text{C-NMR}$  (101 MHz,  $\text{CDCl}_3$ ):  $\delta$  144.1, 138.6, 134.0, 132.9, 128.9, 128.6, 128.5, 127.2, 126.9, 126.7, 122.1, 121.5, 116.9, 111.9, 90.3, 82.3, 53.9, 50.3, 27.7, 24.9; HRMS (ESI)  $m/z$  Calcd for  $\text{C}_{24}\text{H}_{21}\text{ClN}$   $[\text{M}+\text{H}]^+$ : 358.1363. Found: 358.1357.

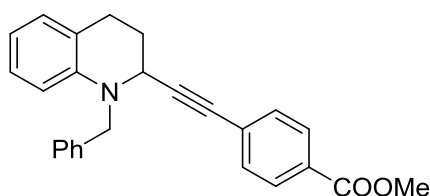

***N*-Benzyl-2-(4-methylformatephenylethynyl)-1,2,3,4-tetrahydroquinoline 9af**

Light yellow oil; 78% yield (74.3 mg);  $^1\text{H-NMR}$  (400 MHz,  $\text{CDCl}_3$ ):  $\delta$  7.94 (d,  $J = 8.3$  Hz, 2H), 7.39 (d,  $J = 8.3$  Hz, 2H), 7.35-7.33 (m, 3H), 7.26 (s, 3H), 7.02 (dd,  $J = 16.9, 7.7$  Hz, 2H), 6.66 (t,  $J = 7.3$  Hz, 1H), 6.56 (d,  $J = 8.2$  Hz, 1H), 4.72-4.60 (ABq,  $J = 16.9$  Hz, 2H), 4.49 (t,  $J = 3.8$  Hz, 1H), 3.90 (s, 3H), 3.25 (dt,  $J = 16.6, 8.6$  Hz, 1H), 2.80 (dt,  $J = 16.1, 3.8$  Hz, 1H), 2.25 (dt,  $J = 8.4, 4.1$  Hz, 2H);  $^{13}\text{C-NMR}$  (101 MHz,  $\text{CDCl}_3$ ):  $\delta$  166.5, 144.1, 138.6, 131.6, 129.4, 129.3, 128.9, 128.6, 127.7, 127.3, 126.9, 126.7, 122.1, 117.0, 111.9, 92.5, 82.8, 53.9, 52.2, 50.4, 27.7, 25.0; HRMS (ESI)  $m/z$  Calcd for  $\text{C}_{26}\text{H}_{24}\text{NO}_2$   $[\text{M}+\text{H}]^+$ : 382.1807. Found: 382.1797.

#### 4.4 Synthesis of natural alkaloids and important intermediates (Scheme 3)

##### Synthesis of 9dh and ( $\pm$ ) galipinine 10 (Scheme 3, entry 1)

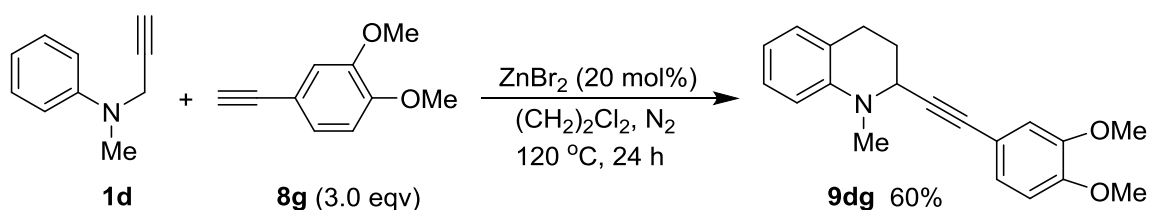

*N*-Methyl-*N*-(2-propynyl)aniline (**1d**),  $\text{ZnBr}_2$  (11.3 mg, 0.05 mmol) and 4-ethynyl-1,2-dimethoxybenzene (**8g**) (0.75 mmol, 81  $\mu\text{l}$ ) in 1,2-dichloroethane (0.25 ml) were stirred at 120  $^\circ\text{C}$  for 24 hours in a closed vial tube protected with  $\text{N}_2$ . The resulting mixture was concentrated under reduced pressure. The residue was purified by silica gel column chromatography (petroleum ether : ethyl acetate = 30:1 (v/v)) to give *N*-benzyl-2-ethynylbenzene-1,2,3,4 tetrahydroquinoline **9dg** (64.7 mg, 80% yield) as light yellow oil.  $^1\text{H-NMR}$  (400 MHz,  $\text{CDCl}_3$ ):  $\delta$  7.13-7.07 (m, 1H), 7.03-6.99 (m, 1H), 6.96

(dd,  $J = 8.3, 1.9$  Hz, 1H), 6.86 (d,  $J = 1.8$  Hz, 1H), 6.75 (d,  $J = 8.3$  Hz, 1H), 6.68 (t,  $J = 7.3$  Hz, 2H), 4.35 (t,  $J = 3.8$  Hz, 1H), 3.86 (s, 3H), 3.84 (s, 3H), 3.18 (ddd,  $J = 16.2, 11.2, 6.3$  Hz, 1H), 3.01 (s, 3H), 2.74 (dt,  $J = 16.0, 4.1$  Hz, 1H), 2.27-2.13 (m, 2H);  $^{13}\text{C-NMR}$  (101 MHz,  $\text{CDCl}_3$ ):  $\delta$  149.2, 148.5, 145.0, 128.7, 127.1, 125.0, 122.6, 117.0, 115.2, 114.4, 111.8, 110.8, 87.0, 83.5, 55.9, 55.8, 51.8, 37.8, 27.8, 24.7; HRMS (ESI)  $m/z$  Calcd for  $\text{C}_{20}\text{H}_{22}\text{NO}_2$   $[\text{M}+\text{H}]^+$ : 308.1651. Found: 308.1644.

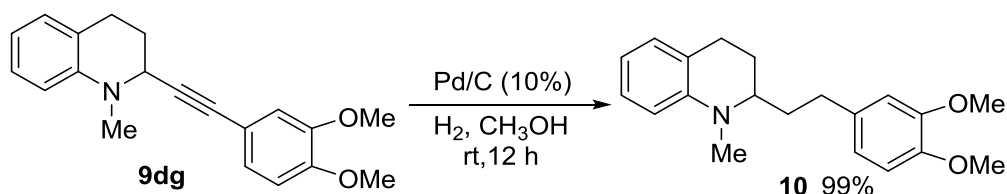

Compound **9dg** (42.6 mg, 0.14 mmol) and Pd/C (5% loading, 12.8 mg, 30%) in methanol (10 ml) were stirred at room temperature overnight protected by a hydrogen balloon. The resulting mixture was concentrated under reduced pressure to give ( $\pm$ ) **galipinine 10** (43.1 mg, 99%) as a white solid without further purification.  $^1\text{H-NMR}$  (400 MHz,  $\text{CDCl}_3$ ):  $\delta$  7.08 (t,  $J = 7.7$  Hz, 1H), 6.98 (d,  $J = 7.3$  Hz, 1H), 6.79 (d,  $J = 8.0$  Hz, 1H), 6.72 (d,  $J = 10.0$  Hz, 2H), 6.59 (t,  $J = 7.2$  Hz, 1H), 6.53 (d,  $J = 8.2$  Hz, 1H), 3.86 (d,  $J = 5.7$  Hz, 6H), 3.29 (dq,  $J = 8.4, 4.1$  Hz, 1H), 2.92 (s, 3H), 2.85 (ddd,  $J = 17.7, 11.9, 6.4$  Hz, 1H), 2.68 (ddd,  $J = 18.8, 9.5, 4.8$  Hz, 2H), 2.53 (ddd,  $J = 13.9, 10.1, 6.5$  Hz, 1H), 2.00-1.86 (m, 3H), 1.73 (dtd,  $J = 13.9, 9.5, 5.5$  Hz, 1H); MS (ESI)  $m/z$  Calcd for  $\text{C}_{20}\text{H}_{26}\text{NO}_2$   $[\text{M}+\text{H}]^+$ : 312.20. Found: 312.27. Spectral data are in accordance with the reported data.<sup>[3]</sup>

### Synthesis of **9dh** and ( $\pm$ ) cuspareine **11** (Scheme 3, entry 1)

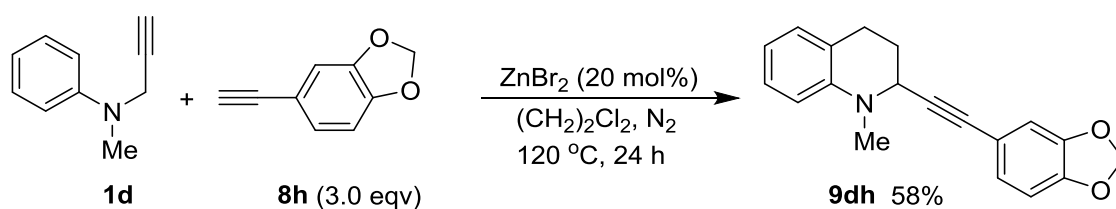

*N*-benzyl-*N*-(2-propynyl)aniline (**1d**),  $\text{ZnBr}_2$  (11.3 mg, 0.05 mmol) and 4-ethynyl-1,2-ylidenedioxybenzene (**8h**) (0.75 mmol, 81  $\mu\text{l}$ ) in 1,2-dichloroethane (0.25 ml) were stirred at  $120^\circ\text{C}$  for 24 h in a closed vial tube protected with  $\text{N}_2$ . The resulting mixture was concentrated under reduced pressure. The residue was purified by silica gel column chromatography (petroleum ether : eluent ethyl acetate = 30:1 (v/v)) to give *N*-benzyl-2-ethynylbenzene-1,2,3,4-tetrahydroquinoline **9dh** (64.7 mg, 80% yield) as light yellow oil. White solid; 58% yield (42.2 mg);  $^1\text{H-NMR}$  (400 MHz,  $\text{CDCl}_3$ ):  $\delta$  7.10 (td,  $J = 8.1, 1.4$  Hz, 1H), 7.00 (d,  $J = 7.3$  Hz, 1H), 6.88 (dd,  $J = 8.0, 1.6$  Hz, 1H), 6.80 (d,  $J = 1.5$  Hz, 1H), 6.70-6.63 (m, 2H), 5.93 (s, 2H), 4.33-4.30 (m, 1H), 3.21-3.11 (m, 1H), 2.99 (s, 3H), 2.73 (dt,  $J = 16.1, 4.2$  Hz, 1H), 2.18 (ddtt,  $J = 9.9, 7.8, 6.1, 4.2$  Hz, 2H);  $^{13}\text{C-NMR}$  (101 MHz,  $\text{CDCl}_3$ ):  $\delta$  147.7, 147.3, 145.1, 128.8, 127.1, 126.3, 122.7, 117.1, 116.4, 111.9, 111.8, 108.3, 101.2, 86.9, 83.5, 51.9, 37.9, 27.9, 24.8; HRMS (ESI)  $m/z$  Calcd for  $\text{C}_{19}\text{H}_{18}\text{NO}_2[\text{M}+\text{H}]^+$ : 292.1338. Found: 292.1330.

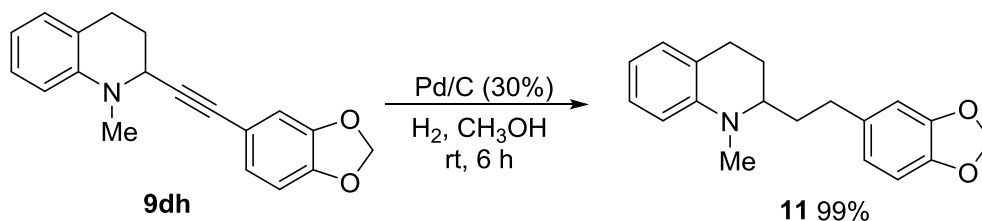

Compound **9dh** (55.6 mg, 0.19 mmol) and  $\text{Pd/C}$  (5% loading, 16.7 mg, 30%) in methanol (10 ml) were stirred at room temperature in a hydrogen autoclave (0.6 Mpa) for 6 hours protected by a hydrogen balloon. The resulting mixture was concentrated under reduced pressure to give 2-(2-(benzo[d][1,3]dioxol-5-yl)ethyl)-1-methyl-1,2,3,4-tetrahydroquinoline **11** (56.1 mg, 99%) as a white solid without further purification.  $^1\text{H-NMR}$  (400 MHz,  $\text{CDCl}_3$ ):  $\delta$  7.07 (t,  $J = 7.7$  Hz, 1H), 6.97 (d,  $J = 7.2$  Hz, 1H), 6.74-6.67 (m, 2H), 6.65-6.56 (m, 2H), 6.52 (d,  $J = 8.2$  Hz, 1H), 5.91 (s, 2H), 3.26 (dq,  $J = 8.5, 4.1$  Hz, 1H), 2.90 (s, 3H), 2.83 (ddd,  $J = 17.6, 11.5, 6.7$  Hz, 1H), 2.65 (ddt,  $J = 23.9, 15.4, 4.9$  Hz, 2H), 2.50 (ddd,  $J = 13.9, 9.9, 6.6$  Hz, 1H), 1.95-1.83 (m, 3H), 1.70 (dtd,  $J = 14.2, 9.5, 5.5$  Hz, 1H); MS (ESI-TOF)  $m/z$  Calcd for  $\text{C}_{19}\text{H}_{22}\text{NO}_2[\text{M}+\text{H}]^+$ : 295.17. Found: 296.22. Spectral data are in accordance with the reported data.<sup>[3]</sup>

## Synthesis of compound **12** (Scheme 3, entry 2)

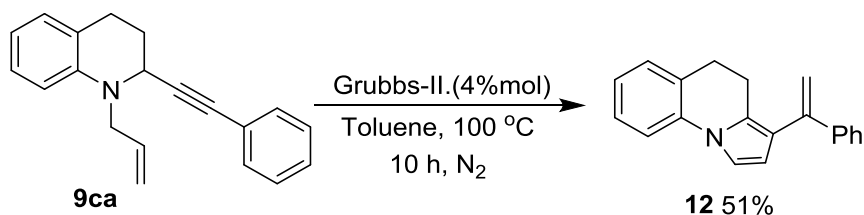

Compound **9ca** (0.25 mmol, 68.2 mg) and Grubbs-II catalyst (0.01 mmol, 8.5 mg) in toluene (1.5 ml), were stirred at 110 ° C for 40 hours. The resulting mixture was concentrated under reduced pressure. The residue was purified by silica gel column chromatography (dichloromethane: petroleum ether = 1:4 (V:V)) to give 3-(1-phenylvinyl)-4,5-dihydropyrrolo[1,2-a]quinoline **12** (24.0 mg, 51% yield) as white solid. <sup>1</sup>H-NMR (400 MHz, CDCl<sub>3</sub>): δ 7.44 (dd, *J* = 7.8, 1.6 Hz, 2H), 7.36-7.27 (m, 5H), 7.21 (d, *J* = 7.1 Hz, 1H), 7.17 (d, *J* = 3.1 Hz, 1H), 7.06 (td, *J* = 7.4, 1.1 Hz, 1H), 6.27 (d, *J* = 3.0 Hz, 1H), 5.39 (d, *J* = 1.6 Hz, 1H), 5.22 (d, *J* = 1.6 Hz, 1H), 2.81-2.76 (m, 2H), 2.64 (dd, *J* = 8.2, 5.7 Hz, 2H); <sup>13</sup>C-NMR (101 MHz, CDCl<sub>3</sub>): δ 143.9, 142.3, 136.6, 128.8, 128.0, 128.0, 127.8, 127.6, 127.4, 127.4, 123.9, 120.9, 115.2, 114.2, 112.5, 111.2, 26.7, 21.6; HRMS (ESI) *m/z* Calcd for C<sub>24</sub>H<sub>20</sub>ClN [M+H]<sup>+</sup>: 272.1439. Found: 272.1425.

## 4.5 Isotopic labeling experiments (Scheme 4, Scheme 5)

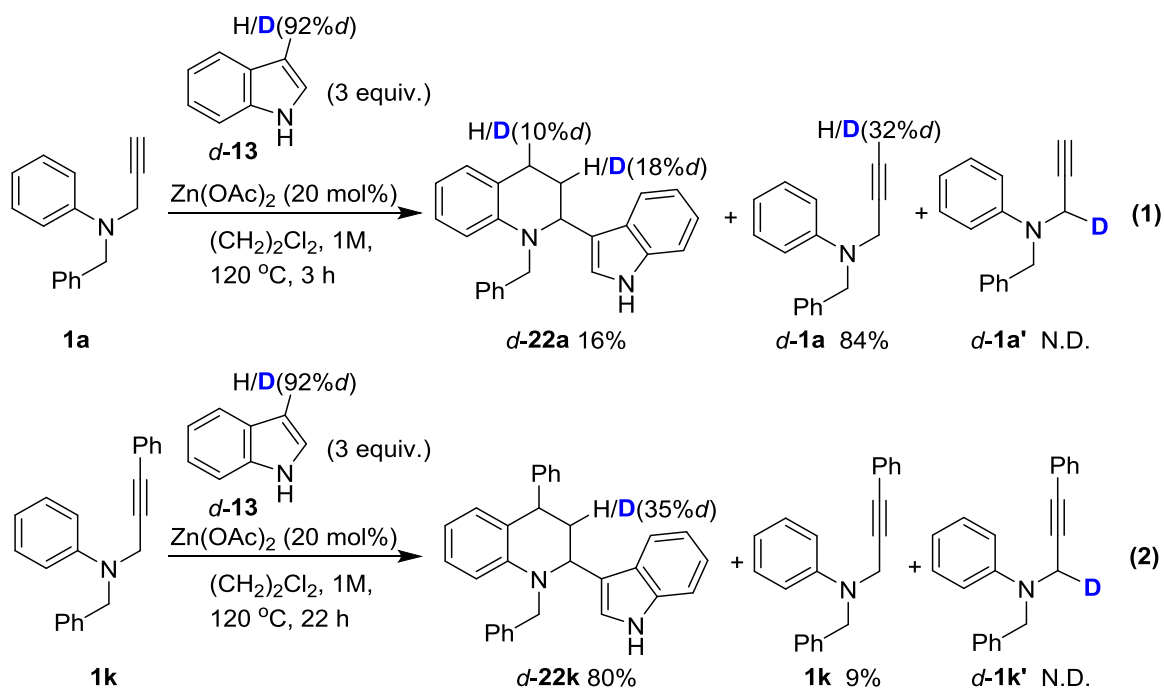

**Eq 1:** **1a** (0.25 mmol, 55.3 mg), ZnBr<sub>2</sub> (0.025 mmol, 11.3 mg) and *d*-**13** (0.75 mmol, 87.9 mg) in 1,2-dichloroethane (250 μl) were stirred at 120 ° C for 3 hours in a closed vial tube protected with N<sub>2</sub>. The resulting mixture was concentrated under reduced pressure. The residue was purified by silica gel column chromatography (petroleum ether : eluent ethyl acetate = 30:1 (v/v)) to give the final product *d*-**22a** (13.0 mg, yield: 16%; *d*-incorporation: C3: 18%, C4: 10%), *d*-**1a** (47.2 mg, yield: 84%; *d*-incorporation:

32%), no *d-1a'* was detected or isolated. They were characterized by <sup>1</sup>H-NMR. The deuterium atom at the C2-position (92% *d*) of *d-13* might have been not only transferred to C3-position (18% *d*) and C4-position (10% *d*) of *d-22a*, but also transferred to terminal alkyne (32%*d*) of *d-1a*.

**Eq 2:** **1k** (0.25 mmol, 74.3 mg), ZnBr<sub>2</sub> (0.025 mmol, 11.3 mg) and *d-13* (0.75 mmol, 87.9 mg) in 1,2-dichloroethane( 250 μl ) were stirred at 120 °C for 24 hours in a closed vial tube protected with N<sub>2</sub>. The resulting mixture was concentrated under reduced pressure. The residue was purified by silica gel column chromatography (petroleum ether : eluent ethyl acetate = 30:1 (v/v)) to give the *d-22k* (83.0 mg, yield: 80%; *d*-incorporation: C3: 35%), **1k** (6.8 mg, yield: 9%), and no *d-1k'* was detected or isolated. They were characterized by <sup>1</sup>H-NMR. The deuterium atom at the C2-position (92%*d*) of *d-13* can be transferred to C3-position (35%*d*) of *d-22k*, but cannot be transferred to **1k'** (with no active terminal alkyne).

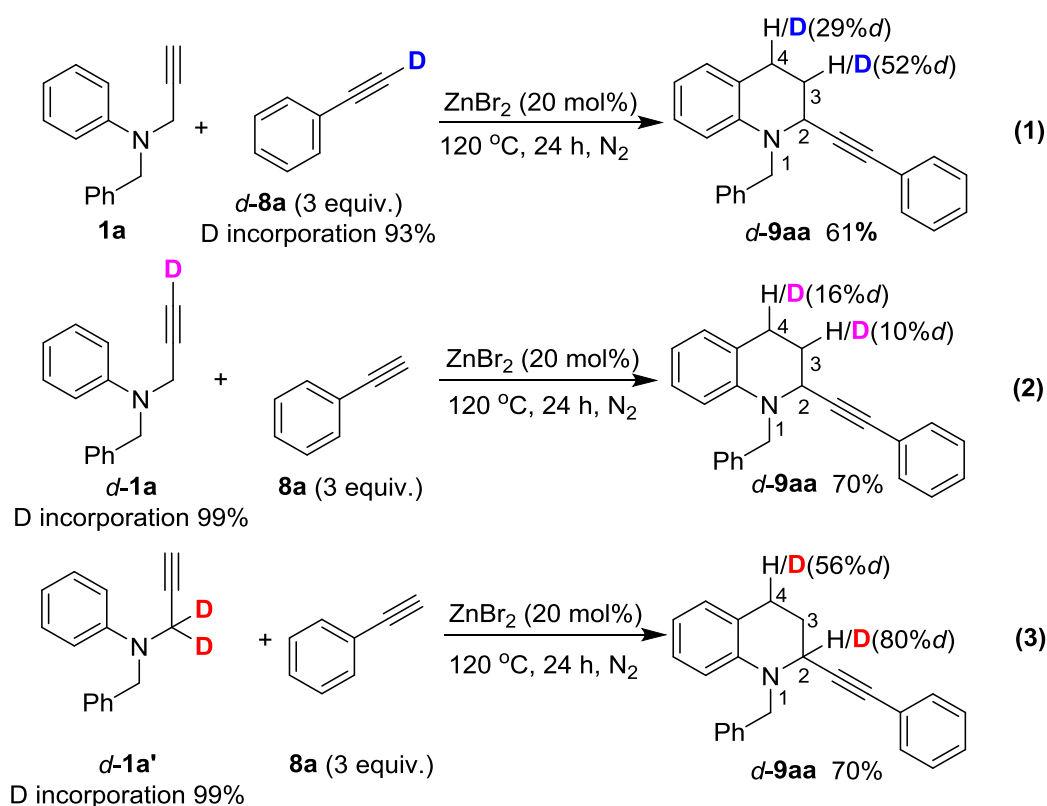

**Eq 1:** **1a** (0.25 mmol, 55.3 mg), ZnBr<sub>2</sub> (0.025 mmol, 11.3 mg) and *d-8a* (0.75 mmol, 81 μl) in 1,2-dichloroethane( 250 μl ) were stirred at 120 °C for 24 hours in a closed vial tube protected with N<sub>2</sub>. The resulting mixture was concentrated under reduced pressure. The residue was purified by silica gel column chromatography (petroleum ether : eluent ethyl acetate = 30:1 (v/v)) to give the final product *d-9aa*, characterized by <sup>1</sup>H-NMR. The deuterium atom at the terminal alkyne (93% *d*) of *d-8a* might have been transferred to C3-position (52% *d*) and C4-position (29% *d*) of *d-9aa* according to the <sup>1</sup>H-NMR spectrum of *d-9aa*.

**Eq 2:** *d-1a* (0.25 mmol, 55.9 mg), ZnBr<sub>2</sub> (0.025 mmol, 11.3 mg) and phenylacetylene (**8a**) (0.75 mmol, 81 μl) in 1,2-dichloroethane( 250 μl ) were stirred at 120 °C for 24 hours in a closed vial tube protected with N<sub>2</sub>. The resulting mixture was concentrated under reduced pressure. The residue was purified by

silica gel column chromatography (petroleum ether : eluent ethyl acetate = 30:1 (v/v)) to give the final product *d*-**9aa**, and characterized by <sup>1</sup>H-NMR. The deuterium atom at the terminal alkyne (93% *d*) of *d*-**8a** might have been transferred to C3-position (10% *d*) and C4-position (16% *d*) of *d*-**9aa** according to the <sup>1</sup>H-NMR spectrum of *d*-**9aa** .

**Eq 3:** *d*-**1a'** (0.25 mmol, 55.8 mg), ZnBr<sub>2</sub> (0.025 mmol, 11.3 mg) and phenylacetylene (**8a**) (0.75 mmol, 81 μl) in 1,2-dichloroethane( 250 μl ) were stirred at 120 °C for 24 hours in a closed vial tube protected with N<sub>2</sub>. The resulting mixture was concentrated under reduced pressure. The residue was purified by silica gel column chromatography (petroleum ether : eluent ethyl acetate = 30:1 (v/v)) to give the final product *d*-**9aa**, and characterized by <sup>1</sup>H-NMR. The deuterium atom at the C2 position of *d*-**1a'** (99% *d*) might have been transferred to C4-position (56% *d*) of *d*-**9aa** according to the <sup>1</sup>H-NMR spectrum of *d*-**9aa**.



## 5. Synthesis of starting materials

### Synthesis of *N*-benzyl-*N*-(2-propynyl)anilines **1a, 1g-i** <sup>[4]</sup>

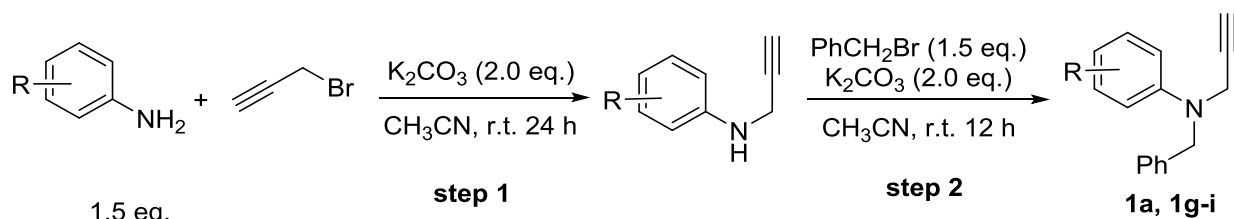

To a solution of anilines (15 mmol) in acetonitrile (40 mL) was added potassium carbonate (2.76 g, 20 mmol) followed by propargyl bromide (0.75 mL, 10 mmol) and the resultant mixture was stirred for 24 h at room temperature. The reaction mixture was filtered and concentrated to afford the crude residue, which was purified by silica gel column chromatography to afford *N*-(prop-2-ynyl)anilines. To a solution of *N*-(2-propynyl)anilines (5 mmol) in acetonitrile (10 mL) was added potassium carbonate (1.38 g, 10 mmol) followed by benzyl bromide (0.9 mL, 7.5 mmol) and the resultant mixture was stirred 12 h at room temperature. The reaction mixture was filtered and concentrated to afford the crude residue, which was purified by silica gel column chromatography (hexane : ethyl acetate = 30 : 1 (v:v)) to afford *N*-benzyl-*N*-(2-propynyl)anilines.

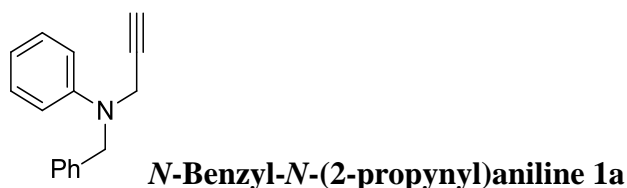

Yellow oil; 88% yield (0.97 g); <sup>1</sup>H-NMR (400 MHz, CDCl<sub>3</sub>): δ 7.33 (d, *J* = 4.7 Hz, 4H), 7.30-7.22 (m, 3H), 6.91 (d, *J* = 8.1 Hz, 2H), 6.82 (t, *J* = 7.3 Hz, 1H), 4.56 (s, 2H), 4.03 (d, *J* = 2.2 Hz, 2H), 2.22 (t, *J* = 2.3 Hz, 1H). Spectral data are in accordance with the reported data.<sup>[4]</sup>

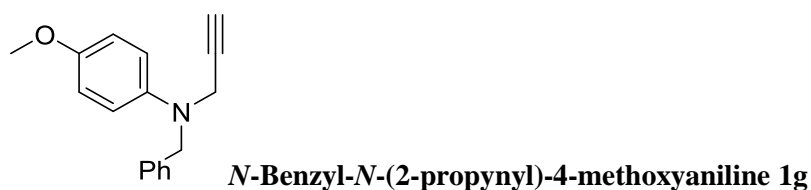

White solid; 81% yield (1.01 g); <sup>1</sup>H-NMR (400 MHz, CDCl<sub>3</sub>): δ 7.36-7.25 (m, 5H), 6.92 (d, *J* = 9.0 Hz, 2H), 6.83 (d, 2H), 4.43 (s, 2H), 3.91 (d, *J* = 2.2 Hz, 2H), 3.76 (s, 3H), 2.22 (t, *J* = 2.1 Hz, 1H). Spectral data are in accordance with the reported data.<sup>[4]</sup>

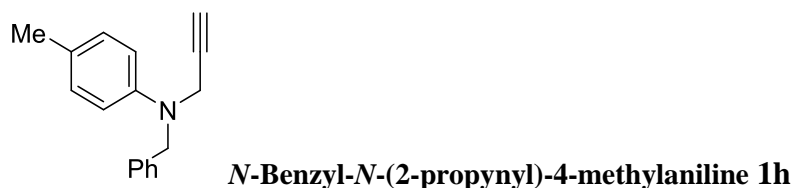

Yellow oil; 80% yield (0.94 g);  $^1\text{H-NMR}$  (400 MHz,  $\text{CDCl}_3$ ):  $\delta$  7.42-7.16 (m, 5H), 7.07 (d,  $J = 8.2$  Hz, 2H), 6.84 (d,  $J = 8.4$  Hz, 1H), 4.50 (s, 2H), 3.98 (d,  $J = 1.9$  Hz, 1H), 2.26 (s, 3H), 2.20 (t,  $J = 2.0$  Hz, 1H). Spectral data are in accordance with the reported data.<sup>[4]</sup>

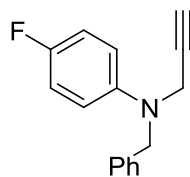

***N*-Benzyl-*N*-(2-propynyl)-4-fluoroaniline **1i****

Yellow oil; 80% yield (0.96 g);  $^1\text{H-NMR}$  (400 MHz,  $\text{CDCl}_3$ ):  $\delta$  7.38-7.23 (m, 6H), 6.95 (t,  $J = 8.6$  Hz, 2H), 6.86 (dd,  $J = 9.0, 4.4$  Hz, 2H), 4.47 (s, 2H), 3.95 (d,  $J = 1.6$  Hz, 2H), 2.23 (t,  $J = 2.2$  Hz, 1H);  $^{13}\text{C}$  NMR (126 MHz,  $\text{CDCl}_3$ ):  $\delta$  156.6 (d,  $^1J_{\text{C-F}} = 237.5$  Hz), 145.5 (d,  $^4J_{\text{C-F}} = 2.2$  Hz), 138.2, 128.6, 127.4, 127.3, 116.4 (d,  $^3J_{\text{C-F}} = 7.5$  Hz), 115.5 (d,  $^2J_{\text{C-F}} = 22.2$  Hz), 79.4, 72.4, 55.8, 40.6; HRMS (ESI)  $m/z$  Calcd for  $\text{C}_{16}\text{H}_{15}\text{FN}$   $[\text{M}+\text{H}]^+$ : 240.1189. Found: 240.1181.

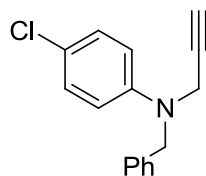

***N*-Benzyl-*N*-(2-propynyl)-4-chloroaniline **1j****

Yellow oil; 81% yield (1.04 g);  $^1\text{H-NMR}$  (400 MHz,  $\text{CDCl}_3$ ):  $\delta$  7.31 (dt,  $J = 14.3, 6.6$  Hz, 5H), 7.17 (d,  $J = 7.8$  Hz, 2H), 6.79 (d,  $J = 7.8$  Hz, 2H), 4.51 (s, 2H), 3.99 (d,  $J = 2.3$  Hz, 2H), 2.25-2.20 (t,  $J = 2.3$  Hz, 1H). Spectral data are in accordance with the reported data.<sup>[4]</sup>

### Synthesis of *N,N*-diphenyl-*N*-(2-propynyl)amine **1b**<sup>[4]</sup>

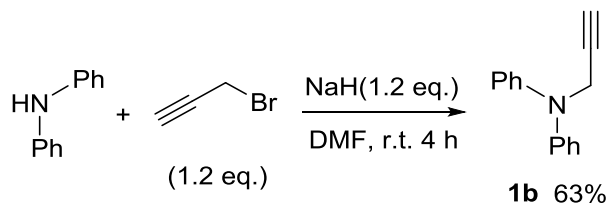

To a dry dimethylformamide solution (30 mL) of diphenylamine (3.38 g, 20 mmol) was added 60% NaH (0.96 g, 24 mmol) at 0 °C under  $\text{N}_2$ , and the mixture was stirred for 30 min at room temperature. Then propargyl bromide (1.80 ml, 24 mmol) was added to the reaction media and let stirring continue for 4 h. The reaction was quenched by saturated  $\text{NH}_4\text{Cl}$  aqueous solution and the mixture was extracted three times with ethyl acetate. The combined organic layer was washed with saturated aqueous NaCl solution, dried over anhydrous  $\text{MgSO}_4$ , and concentrated in vacuo. The resulting residue was purified by silica gel column chromatography (petroleum ether : ethyl acetate = 30 : 1 (v:v)) give to **1b** (2.60 g, 63% yield) as light yellowish oil.  $^1\text{H-NMR}$  (400 MHz,  $\text{CDCl}_3$ ):  $\delta$  7.30 (td,  $J = 7.4, 2.0$  Hz, 4H), 7.12-7.04 (m, 4H), 7.05-6.96 (m, 2H), 4.41 (d,  $J = 2.3$  Hz, 2H), 2.22 (t,  $J = 2.4$  Hz, 1H). Spectral data are in accordance with the reported data.<sup>[4]</sup>

### Synthesis of *N*-allyl-*N*-(2-propynyl)aniline **1c**<sup>[4]</sup>

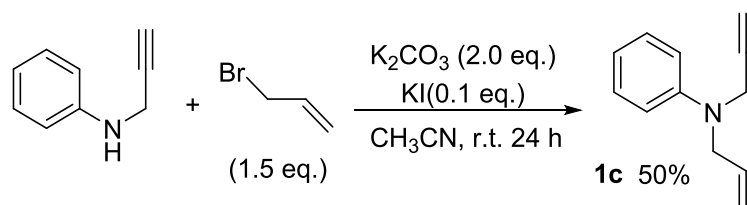

To a solution of the *N*-propargyl aniline (655.9 mg, 5.0 mmol) in acetonitrile (8.0 mL) at room temperature was added potassium bicarbonate (1.5g, 10 mmol) and potassium iodide (0.5 mmol, 83.0 mg), followed by adding allyl bromide (907.3 mg, 648.0  $\mu$ l, 7.5 mmol), and the reaction solution was stirred for 12 hours. Filtered the inorganic salt and then the solvent was evaporated and the oily residue was purified with silica gel column chromatography (petroleum ether : ethyl acetate = 30 : 1 (v:v)) to give **1c** (427.5 mg, 50% yield) as a colorless oil.  $^1\text{H-NMR}$  (400 MHz,  $\text{CDCl}_3$ ):  $\delta$  7.29-7.22 (m, 2H), 6.87 (d,  $J = 8.2$  Hz, 2H), 6.80 (t,  $J = 7.3$  Hz, 1H), 5.90 (ddt,  $J = 17.0, 10.3, 5.2$  Hz, 1H), 5.31-5.17 (m, 3H), 4.02 (d,  $J = 2.3$  Hz, 2H), 3.97 (d,  $J = 5.2$  Hz, 2H), 2.19 (t,  $J = 2.3$  Hz, 1H). Spectral data are in accordance with the reported data.<sup>[4]</sup>

### Synthesis of *N*-methyl-*N*-(2-propynyl)anilines **1d**<sup>[4]</sup>

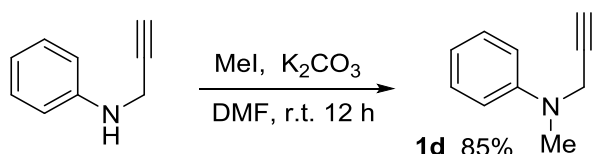

To a solution of *N*-(2-propynyl)aniline (1.31 g, 10 mmol) in dimethylformamide (40 mL) was added potassium carbonate (2.07 g, 15 mmol) followed by iodomethane (0.93 mL, 15 mmol) at 0 °C and the resultant mixture was stirred over night at room temperature. The reaction was quenched by water and the mixture was extracted three times with ethyl acetate. The combined organic layer was washed with saturated aqueous NaCl solution, dried over anhydrous  $\text{MgSO}_4$ , and concentrated in vacuo. The residue was purified by silica gel column chromatography (hexane : ethyl acetate = 30 : 1 (V:V)) to give **1d** (1.23 g, 85 % yield) as colorless oil.  $^1\text{H-NMR}$  (400 MHz,  $\text{CDCl}_3$ ):  $\delta$  7.31-7.24 (m, 3H), 6.88 (d,  $J = 7.9$  Hz, 2H), 6.83 (t,  $J = 7.2$  Hz, 1H), 4.06 (d,  $J = 2.3$  Hz, 2H), 2.98 (s, 3H), 2.18 (t,  $J = 2.3$  Hz, 1H). Spectral data are in accordance with the reported data.<sup>[4]</sup>

### Synthesis of Ethyl-*N*-phenyl-*N*-(prop-2-yn-1-yl)glycinate **1e**<sup>[5]</sup>

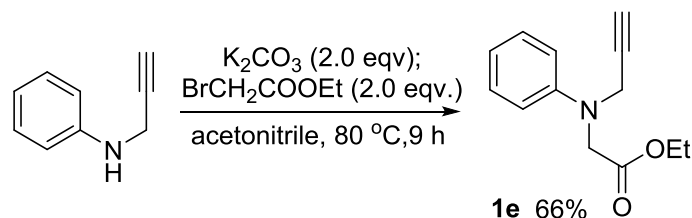

A solution of *N*-phenylpropargylamine (656 mg, 5.0 mmol),  $\text{K}_2\text{CO}_3$  (1.50 g, 10 mmol) and ethyl bromoacetate (947  $\mu$ l, 10 mmol) in acetonitrile (10 mL) was heated to 80 °C overnight. The suspension is filtered and washed with EtOAc (20 mL). The residue was purified by silica gel column chromatography (petroleum ether : ethyl acetate = 20 : 1 (v:v)) to give **1e** (0.71 g, 66 % yield) as colorless oil.  $^1\text{H-NMR}$  (400 MHz,  $\text{CDCl}_3$ ):  $\delta$  7.25 (tt,  $J = 7.4, 2.2$  Hz, 2H), 6.84-6.76 (m, 3H), 4.19 (q,  $J$

= 7.1 Hz, 2H), 4.15 (d,  $J = 2.4$  Hz, 2H), 4.12 (s, 2H), 2.27 (t,  $J = 2.4$  Hz, 1H), 1.25 (t,  $J = 7.1$  Hz, 3H);  $^{13}\text{C}$ -NMR (101 MHz,  $\text{CDCl}_3$ ):  $\delta$  167.2, 144.1, 125.5, 115.1, 110.0, 75.8, 57.4, 48.8, 37.4, 10.5; HRMS (ESI)  $m/z$  Calcd for  $\text{C}_{13}\text{H}_{16}\text{NO}_2$   $[\text{M}+\text{H}]^+$ : 218.1181. Found: 218.1172.

### Synthesis of *N*-(2-chloroethyl)-*N*-(prop-2-yn-1-yl)aniline **1f**<sup>[6]</sup>

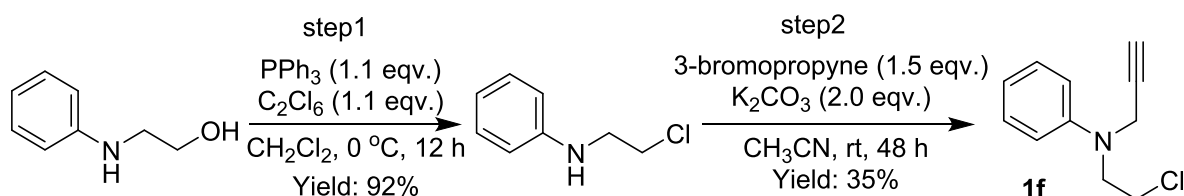

(1) *N*-(2 hydroxyethyl)aniline (1.03g, 7.5 mmol) was added to a 300 mL round-bottom flask followed by  $\text{CH}_2\text{Cl}_2$  (80 mL). The resulting solution was cooled in an ice bath before addition of  $\text{C}_2\text{Cl}_6$  (2.0 g, 8.3 mmol). To this system,  $\text{PPh}_3$  (2.2 g, 8.3 mmol) was slowly added in portions using a powder funnel. After complete addition of  $\text{PPh}_3$ , the funnel was washed with  $\text{CH}_2\text{Cl}_2$  (20 mL). The reaction was subsequently left to warm to room temperature overnight. The resulting white precipitate was collected, added to  $\text{H}_2\text{O}$  (15 mL), and quenched with 3 equiv of saturated  $\text{NaHCO}_3$  aq. The product was extracted with  $\text{CH}_2\text{Cl}_2$  (3 $\times$ 30mL) and dried with  $\text{Na}_2\text{SO}_4$ . After solvent removal on a rotary evaporator, the very pale yellow oil was further dried over  $\text{Na}_2\text{SO}_4$  (1.07 g, 92% yield).

(2) *N*-chloroethylaniline (1.0 g, 6.9 mmol) in anhydrous acetonitrile (20 ml), adding potassium carbonate (1.9 g, 13.8 mmol), then 3-bromopropyne (1.2 g, 10.4 mmol), were stirred at room temperature for 48 h. The crude product was washed with ethyl acetate into a flask, and concentrated under reduced pressure to give a crude product. Finally, the crude product is purified by silica gel column chromatography (petroleum ether: methylene chloride = 3:1 (v/v)), to give product (461.7 mg, 35% yield) as pale yellow oil.  $^1\text{H}$ -NMR (400 MHz,  $\text{CDCl}_3$ ):  $\delta$  7.31-7.24 (m, 2H), 6.83 (dd,  $J = 13.8, 7.7$  Hz, 3H), 4.09 (d,  $J = 2.3$  Hz, 2H), 3.76-3.67 (m, 4H), 2.23 (t,  $J = 2.3$  Hz, 1H);  $^{13}\text{C}$ -NMR (101 MHz,  $\text{CDCl}_3$ ):  $\delta$  147.0, 129.4, 118.6, 113.6, 79.7, 72.4, 53.3, 40.7, 40.6; HRMS (ESI)  $m/z$  Calcd for  $\text{C}_{11}\text{H}_{13}\text{ClN}$   $[\text{M}+\text{H}]^+$ : 194.0737, Found: 194.0726.

### Synthesis of *N*-benzyl-*N*-(2-propynyl)anilines **1k**, **1l**

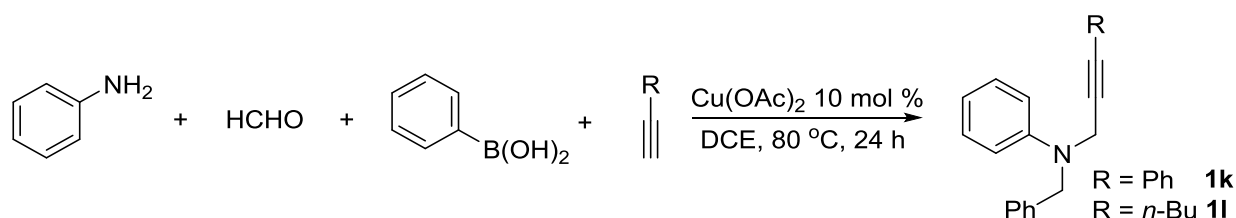

A mixture of aniline (0.47 g, 0.46 mL, 5.0 mmol), formaldehyde (40% aqueous solution) (0.83 g, 0.76 mL, 11.0 mmol), phenylboronic acid (0.64 g, 5.25 mmol), alkyne (6.0 mmol), Copper(II) acetate (0.09 g, 10 mol%) and 1, 2-dichloroethane (15 mL) was stirred in a sealed glass tube at 80 °C for 24 hours. After completion of the reaction, the reaction solution was filtered. After evaporating the solvents in vacuum, the residue was purified by silica gel column chromatography (hexane : ethyl acetate = 30 : 1 (v:v)) to give the pure products.

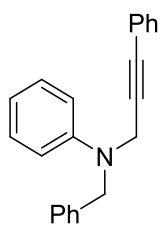

***N*-Benzyl-*N*-(3-phenyl-2-propynyl)aniline **1k****

Yellow oil; 75% yield (1.12 g); <sup>1</sup>H-NMR (500 MHz; CDCl<sub>3</sub>): δ 7.35-7.31 (m, 6H), 7.27-7.24 (m, 6H), 6.94 (d, *J* = 8.0 Hz, 2H), 6.80 (t, *J* = 7.5 Hz, 1H), 4.62 (s, 2H), 4.24 (s, 2H). Spectral data are in accordance with the reported data.<sup>[4]</sup>

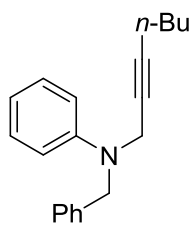

***N*-Benzyl-*N*-(2-heptynyl)aniline **1l****

Yellow oil; 70% yield (0.97 g); <sup>1</sup>H-NMR (500 MHz; CDCl<sub>3</sub>): δ 7.31-7.29 (m, 4H), 7.24-7.19 (m, 3H), 6.87 (d, *J* = 8.0 Hz, 2H), 6.76 (t, *J* = 7.5 Hz, 1H), 4.54 (s, 2H), 3.99 (t, *J* = 2.0 Hz, 2H), 2.17-2.13 (m, 2H), 1.47-1.42 (m, 2H), 1.41-1.32 (m, 2H), 0.88 (t, *J* = 7.5 Hz, 3H). Spectral data are in accordance with the reported data.<sup>[4]</sup>

**Synthesis of *N*-benzyl-*N*-(2-propynyl)anilines **1m****<sup>[7]</sup>

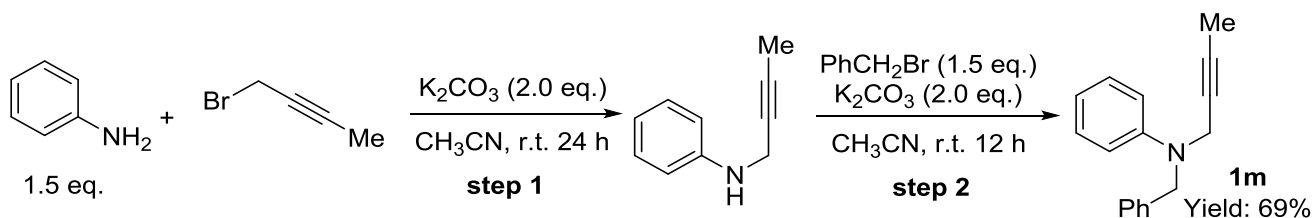

To a solution of anilines (7.5 mmol) in acetonitrile (20 mL) was added potassium carbonate (1.4 g, 10 mmol) followed by 1-bromo-2-butyne (455 μl, 5 mmol) and the resultant mixture was stirred at room temperature for 12 h. The reaction mixture was filtered and concentrated to afford the crude residue, which was purified by silica gel column chromatography to afford *N*-(3-methyl-2-butyne)anilines. To a solution of *N*-(3-methyl-2-butyne)anilines (2.6 mmol) in acetonitrile (10 mL) was added potassium carbonate (0.7 g, 5.2 mmol) followed by benzyl bromide (463 μl, 3.9 mmol) and the resultant mixture was stirred at room temperature for 12 h. The reaction mixture was filtered and concentrated to afford the crude residue, which was purified by silica gel column chromatography (hexane : ethyl acetate = 30 : 1 (v:v)) to give *N*-Benzyl-*N*-(3-methyl-2-butyne)anilines (420.8 mg, 69% yield) as colorless oil. <sup>1</sup>H-NMR (400 MHz, CDCl<sub>3</sub>): δ 7.35-7.29 (m, 4H), 7.23 (t, *J* = 7.0 Hz, 3H), 6.87 (d, *J* = 7.6 Hz, 2H), 6.77 (t, *J* = 7.2 Hz, 1H), 4.55 (s, 2H), 3.98 (s, 2H), 1.80 (d, *J* = 2.0 Hz, 3H); <sup>13</sup>C-NMR (151 MHz, CDCl<sub>3</sub>): δ 149.0, 138.9, 129.2, 128.6, 127.1, 127.0, 117.9, 114.0, 79.8, 75.0, 55.1, 40.2, 3.7. Spectral data are in accordance with the reported data.<sup>[7]</sup>

## Synthesis of Acetylene substrate<sup>[8]</sup>

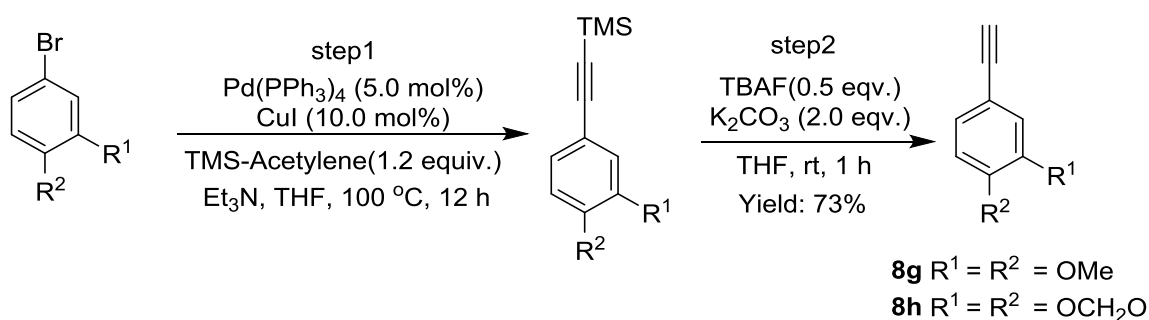

(1) [Pd(PPh<sub>3</sub>)<sub>4</sub>] (288.9 mg, 0.25, 5.0 mol%), CuI (95.2mg, 0.05 mmol, 10.0mol%), 4-bromo aromatic ether (5.0 mmol, 1.0 equiv.) and triethylamine (2.0 mL) were dissolved in dry THF (2.5 mL). Then trimethylsilylacetylene (850  $\mu$ l, 6.0 mmol, 1.2 equiv) was added to the reaction mixture slowly. The resulting mixture was stirred at 50 °C for 24 h in a closed vial protected by N<sub>2</sub>. The mixture was cooled to room temperature and passed through a short pad of celite using ethyl acetate, then concentrated under reduced pressure. The residue was used for the next step without any further purification.

(2) The crude silylated product was dissolved in THF (10 mL), and TBAF (0.65 g, 0.5 equiv) was added portion wise into the flask under N<sub>2</sub> atmosphere at 0 °C. The resulting mixture was stirred at room temperature for 1 h. The mixture was extracted with ethyl acetate (100 mL) and washed with water (100 mL). After drying over with Na<sub>2</sub>SO<sub>4</sub>, the solvent was concentrated under reduced pressure and purified by silica gel chromatographic (hexane as eluent).

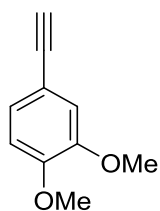

**4-Ethynyl-1,2-dimethoxybenzene (8g)**

Brown solid; 73% yield (591.0 mg); <sup>1</sup>H-NMR (400 MHz, CDCl<sub>3</sub>):  $\delta$  7.11 (dd,  $J$  = 8.3, 1.5 Hz, 1H), 6.99 (d,  $J$  = 1.4 Hz, 1H), 6.80 (d,  $J$  = 8.3 Hz, 1H), 3.88 (d,  $J$  = 4.8 Hz, 6H), 3.00 (s, 1H). Spectral data are in accordance with the reported data.<sup>[8]</sup>

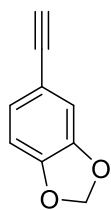

**4-Ethynyl-1,2-ylidenedioxybenzene(8h)**

Brown solid; 64% yield (521.7.0 mg). <sup>1</sup>H-NMR (400 MHz, CDCl<sub>3</sub>):  $\delta$  7.02 (d,  $J$  = 8.0 Hz, 1H), 6.93 (s, 1H), 6.75 (d,  $J$  = 8.0 Hz, 1H), 5.97 (s, 2H), 2.97 (s, 1H). Spectral data are in accordance with the reported data.<sup>[8]</sup>

## Synthesis of *d*-1a<sup>[9]</sup>

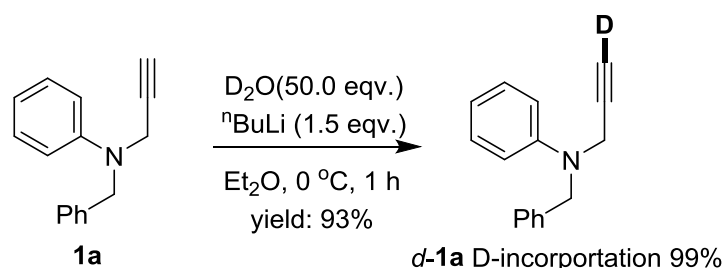

Propargyl aniline **1a** (0.95 mmol, 210.0 mg) was dissolved in Et<sub>2</sub>O (20 ml), then added *n*-BuLi (in hexane, 1.6 M, 846 μl, 1.35 mmol) drop wise at 0 °C. The mixture was allowed to warm to room temperature and was stirred for 1 h. After the quench by D<sub>2</sub>O (1 ml), the mixture was dried over with MgSO<sub>4</sub> and decanted. The residue was concentrated in vacuo to give *d*-**1a** (197.0 mg, 93% yield) as colorless liquid. The <sup>1</sup>H-NMR peak at 2.21 ppm completely disappeared compared to **1a** indicating more than 99% incorporation.

## Synthesis of *d*-1a'<sup>[10]</sup>

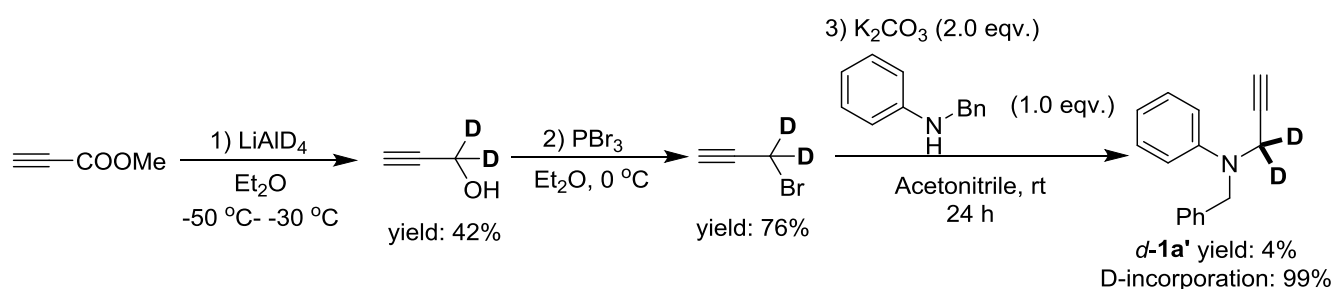

(1) A suspension of lithium aluminum deuteride (LiAlD<sub>4</sub>) (2.4 g, 57.7 mmol) in ether (150 mL) was cooled to -50 °C under nitrogen in a two neck round-bottomed flask. A solution of Methyl propiolate (5.1 g, 61.22 mmol) in ether (50 mL) was added drop wise over a period of 60 min with continuous stirring. The reaction mixture was stirred for another 90 min at -30 °C, and was allowed to cool to room temperature slowly over a period of 3 h and the stirred overnight. The reaction mixture was quenched by successive drop-wise addition of H<sub>2</sub>O (3 mL), NaOH (0.22 g in 1.5 mL H<sub>2</sub>O) and H<sub>2</sub>O (2 mL). The solid was allowed to settle and decanted. The residual solid was washed with ether (2 X 50 mL) and the washings were collected. The combined liquid was dried over MgSO<sub>4</sub> and the ether was evaporated under vacuum. The residual liquid was subjected to distillation under reduced pressure at 650 mbar. The fraction between 60 and 90 °C was collected to give the desired product. The final product was obtained as colorless oil (1.4 g, 42%) without further purification.

(2) To the stirred solution of Deuterated propynol (1.2 g, 20.66 mmol) in dichloromethane (15 mL) at -5 °C under nitrogen, phosphorus tribromide (PBr<sub>3</sub>) (6.0 g, 22.38 mmol) was added drop wise. The solution was stirred at that temperature for 1 h, heated up to room temperature and stirred for three more hours. The reaction mixture was quenched at 0 °C with H<sub>2</sub>O (15.0 mL). The organic layer was washed successively with saturated NaHCO<sub>3</sub> (25.0 mL) and H<sub>2</sub>O (25.0 mL) and dried over MgSO<sub>4</sub>. The solvent was evaporated carefully and the final product was obtained as colorless oil (1.8 g, 15.0 mmol, 72.6%)

and was analyzed by NMR. The product was considered pure enough for the next step without further purification.

(3) *N*-benzylaniline was dissolved (2.5 mmol, 460.0 mg) in anhydrous acetonitrile (10.0 ml), adding anhydrous potassium carbonate (690.0 mg) and *d*-bromopropyne (5.0 mmol, 610.0 mg) and stirred at room temperature for 24 h. The reaction mixture was filtered and concentrated to afford the crude residue, which was purified by silica gel column chromatography (hexane : ethyl acetate = 30 : 1) to give *d*-**1a'** (21.3 mg, 4% yield) as colorless liquid. The <sup>1</sup>H-NMR double peak at 4.03 ppm completely disappeared compared to **1a** indicating more than 99% incorporation.

### Synthesis of *d*-**8a**

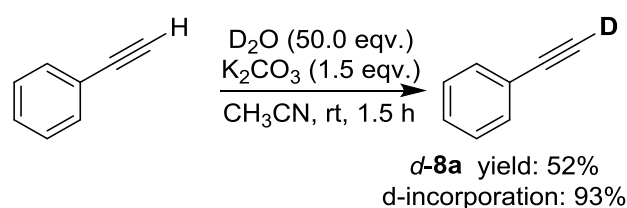

The phenylacetylene **8a** (5.0 mmol, 550 μl) was dissolved in acetonitrile (12.0 ml), stirred at room temperature for 0.5 hours. Deuterium oxide (2.26 ml) was added and stirred for 1 h. Finally, it was dried over by anhydrous MgSO<sub>4</sub>, and filtered to give a acetonitrile solution, and concentrated under reduced pressure to give *d*-**8a** (270.1 mg, yield 52%, *d* incorporation 93%) as light yellow liquid. The <sup>1</sup>H-NMR peak at 3.07 ppm almost disappeared compared to **8a**.

### Synthesis of *d*-**13** <sup>[4]</sup>

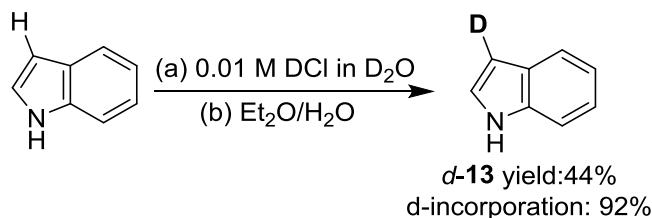

Indole (2.0 g, 17 mmol) was stirred in a 0.01 M solution of DCl in D<sub>2</sub>O (20 mL) at 60°C for 4 h under N<sub>2</sub>. The reaction was cooled and extracted three times with dry Et<sub>2</sub>O (20 mL). The organic layers were combined, dried over MgSO<sub>4</sub> and filtered and reduced under vacuum. The resulting oil was triturated in pentane to afford a colorless solid. The solid ([1,3-<sup>2</sup>H]Indole) was dissolved in a mixture of Et<sub>2</sub>O (20 mL) and H<sub>2</sub>O (10 mL) and stirred for 2 h at room temperature. The layers were separated and the aqueous layer extracted twice with Et<sub>2</sub>O (20 mL). The organic layers were combined, dried over MgSO<sub>4</sub> and filtered and reduced under vacuum to give [3-<sup>2</sup>H]Indole (*d*-**13**, 0.88 g, 44% yield) as colorless solid. The <sup>1</sup>H-NMR peak at 6.55 ppm completely disappeared compared to indole indicating more than 92% incorporation.



## 6. References

- [1] H. Wang, M. Dong, C. Liu, D. Zhang, *Catal. Sci. Technol.*, 2018, **8**, 1997.
- [2] S. Gilberto, B. Annalida, L. Simone, M. Michele, C. Daniel-Henri, J. A. Boutin, D. Philippe, L. Valeria, S. Francesco, L. Alessio, *J. Med. Chem.*, 2015, **58**, 7512.
- [3] M. Pappoppula, F. S. Cardoso, B. O. Garrett, A. Aponick, *Angew. Chem. Int. Ed.*, 2015, **54**, 15202.
- [4] G. Li, H. Nakamura, *Angew. Chem. Int. Ed.*, 2016, **55**, 6758.
- [5] P. P. Lange, A. R. Bogdan, K. James, *Adv. Synth. Catal.*, 2012, **354**, 2373.
- [6] R. T. Baker, J. C. Gordon, C. W. Hamilton, N. J. Henson, P. Lin, S. Maguire, M. Murugesu, B. L. Scott, N. C. Smythe, *J. Am. Chem. Soc.*, 2012, **134**, 5598.
- [7] A. Saito, S. Oda, H. Fukaya, Y. Hanzawa, *J. Org. Chem.*, 2009, **74**, 1517.
- [8] Y. Jeong, J. Lee, J. Ryu, *Bioorgan. Med. Chem.*, 2016, **24**, 2114.
- [9] T. Sugiishi, H. Nakamura, *J. Am. Chem. Soc.*, 2012, **134**, 2504.
- [10] S. Nag, L. Lehmann, G. Kettschau, M. Toth, T. Heinrich, A. Thiele, A. Varrone, C. Halldin, *Bioorgan. Med. Chem.*, 2013, **21**, 6634.

## 7. Copies of $^1\text{H-NMR}$ , $^{13}\text{C-NMR}$ spectra

### *N*-Benzyl-2-nitromethyl-1,2,3,4-tetrahydroquinoline 3a ( $^1\text{H-NMR}$ )

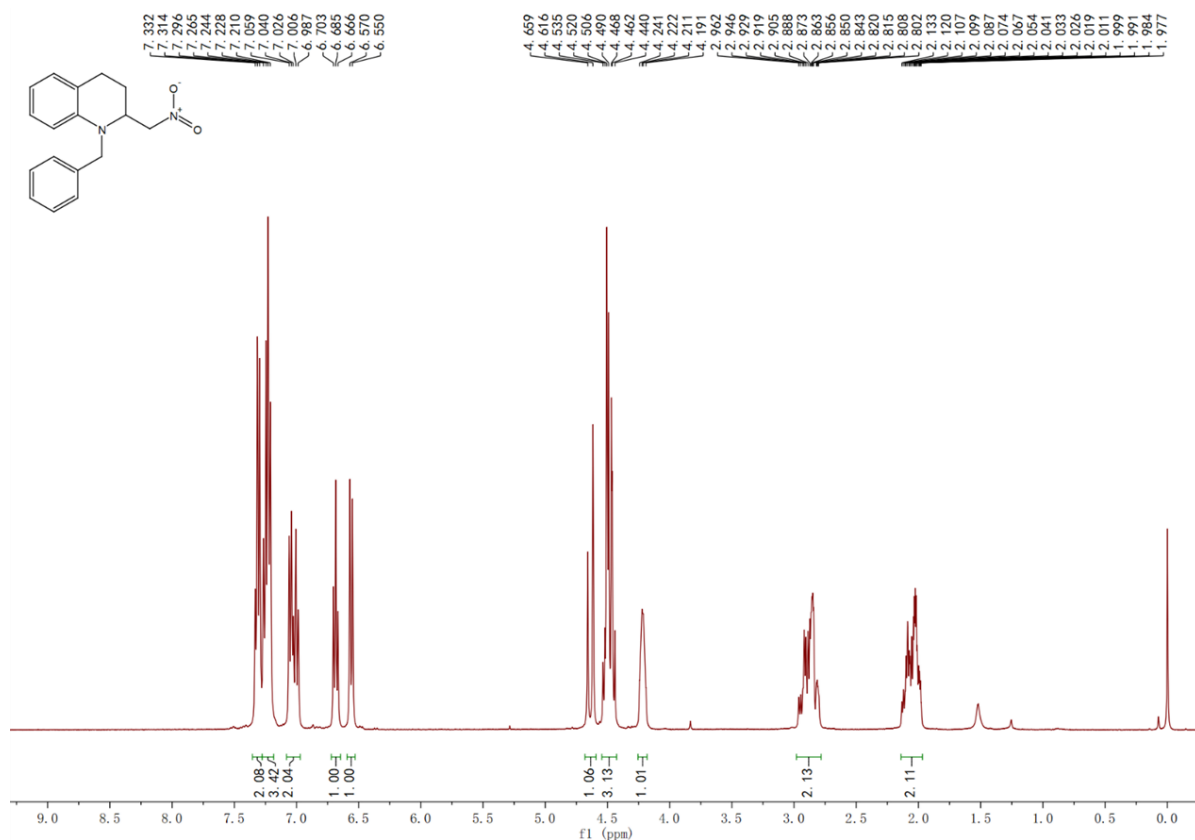

### *N*-Benzyl-2-nitromethyl-1,2,3,4-tetrahydroquinoline 3a ( $^{13}\text{C-NMR}$ )

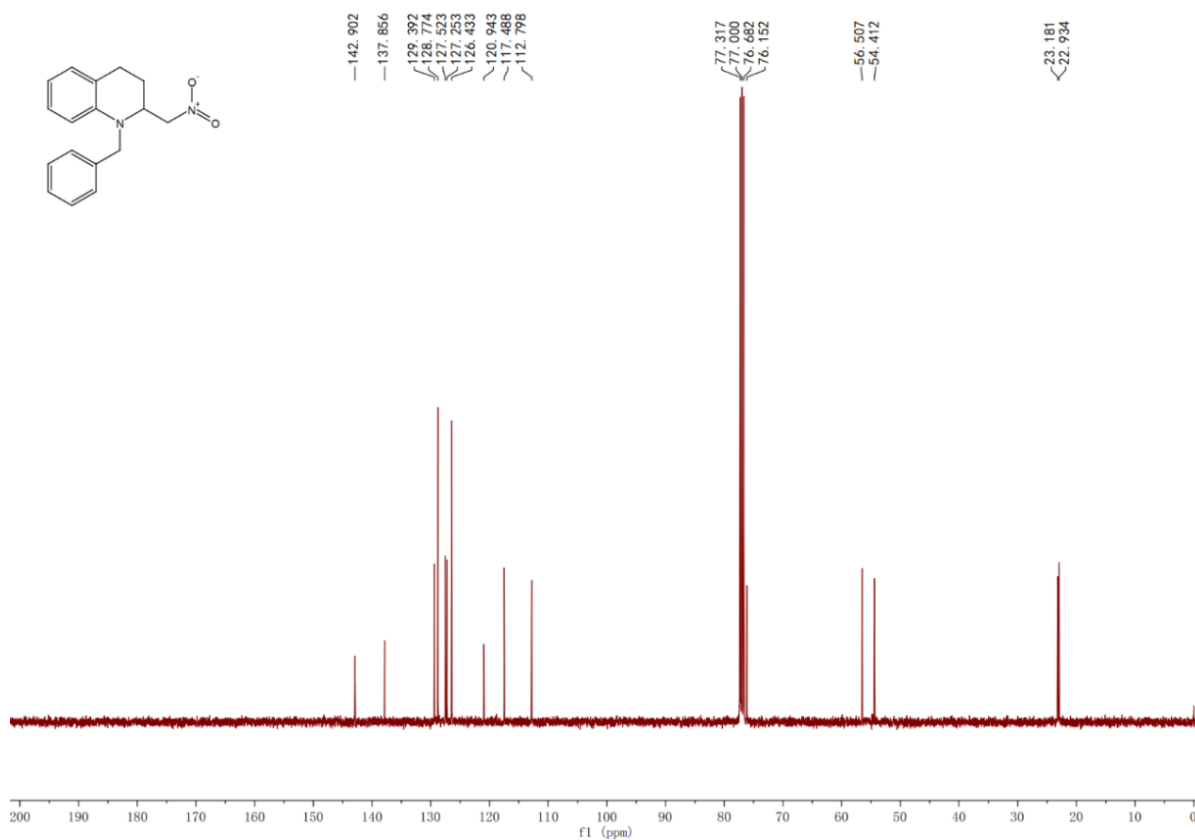

### *N*-Phenyl-2-nitromethyl-1,2,3,4-tetrahydroquinoline 3b (<sup>1</sup>H-NMR)

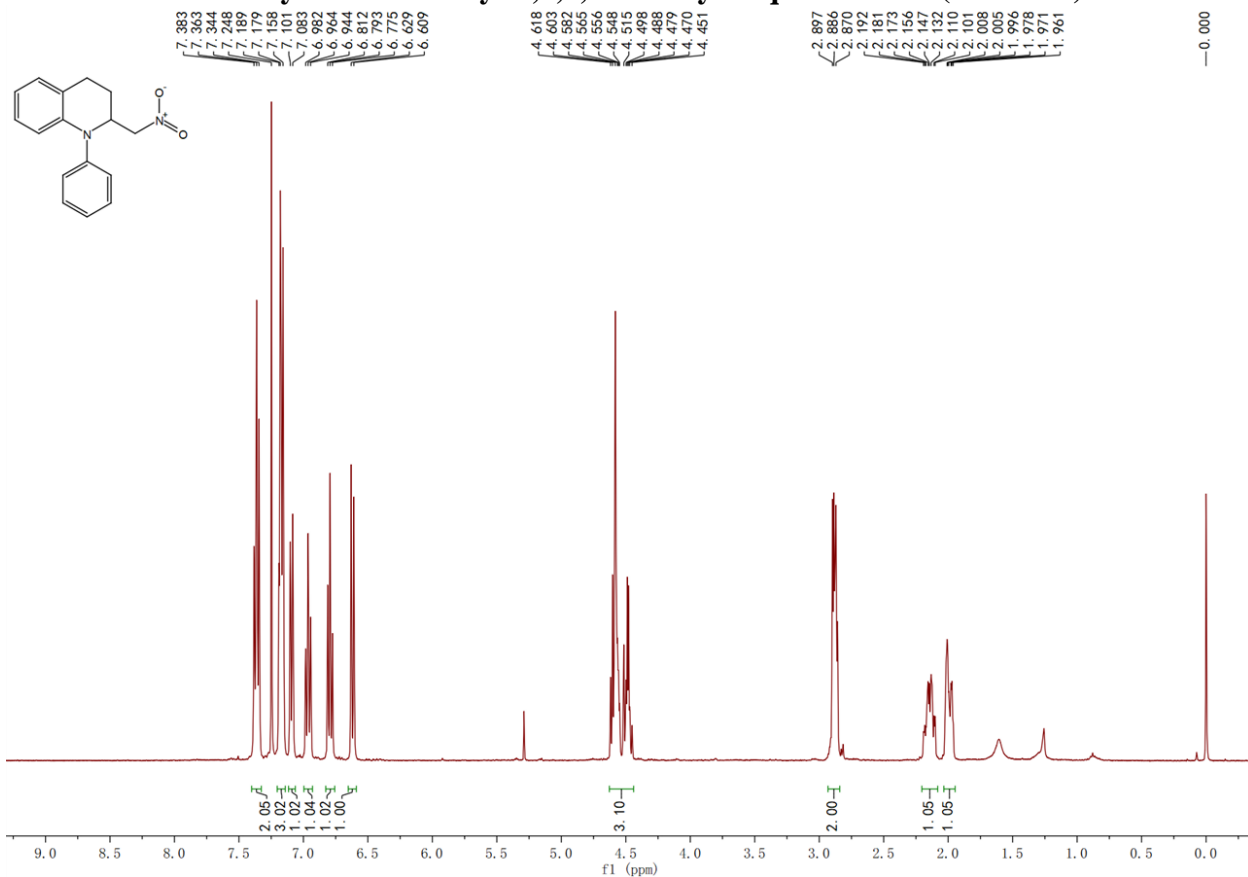

### *N*-Phenyl-2-nitromethyl-1,2,3,4-tetrahydroquinoline 3b (<sup>13</sup>C-NMR)

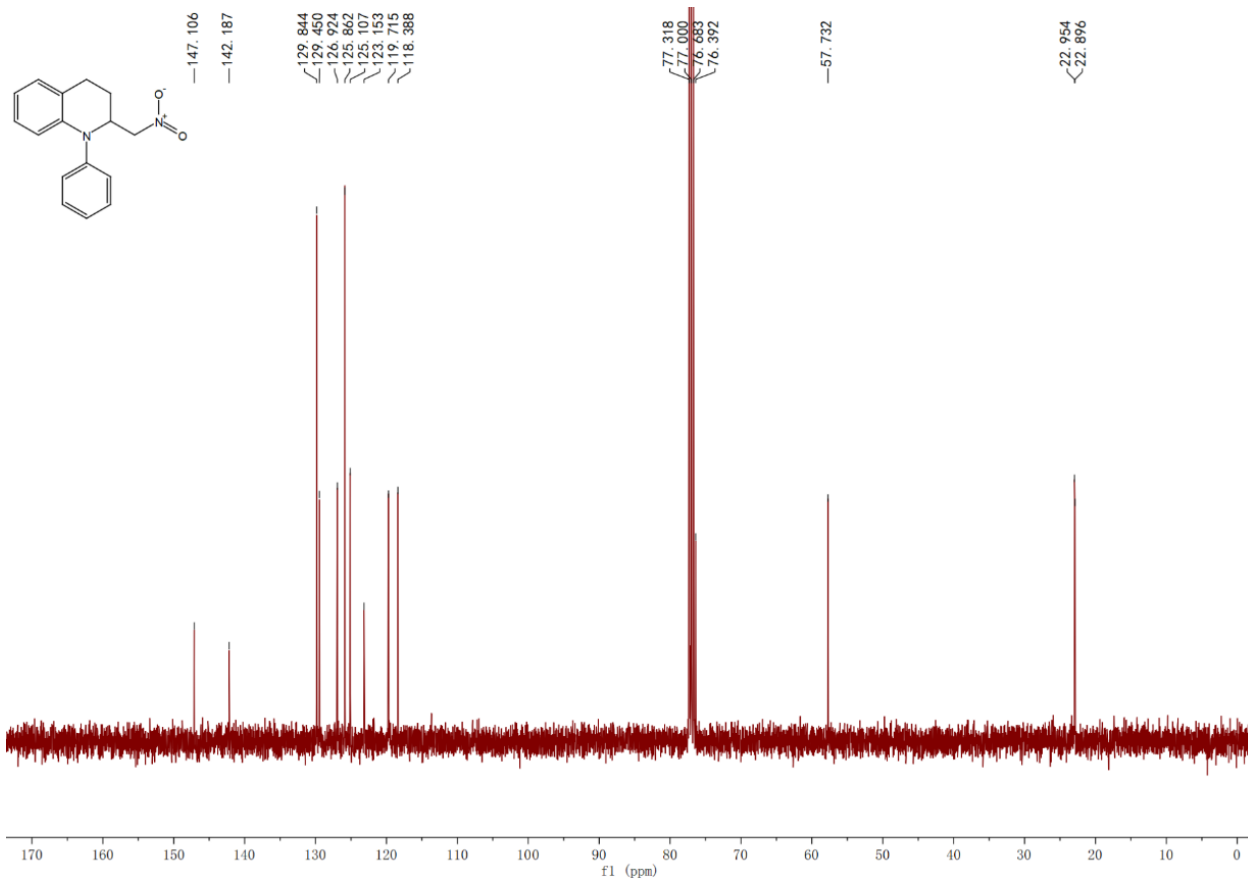

***N*-Allyl-2-nitromethyl-1,2,3,4-tetrahydroquinoline 3c (<sup>1</sup>H-NMR)**

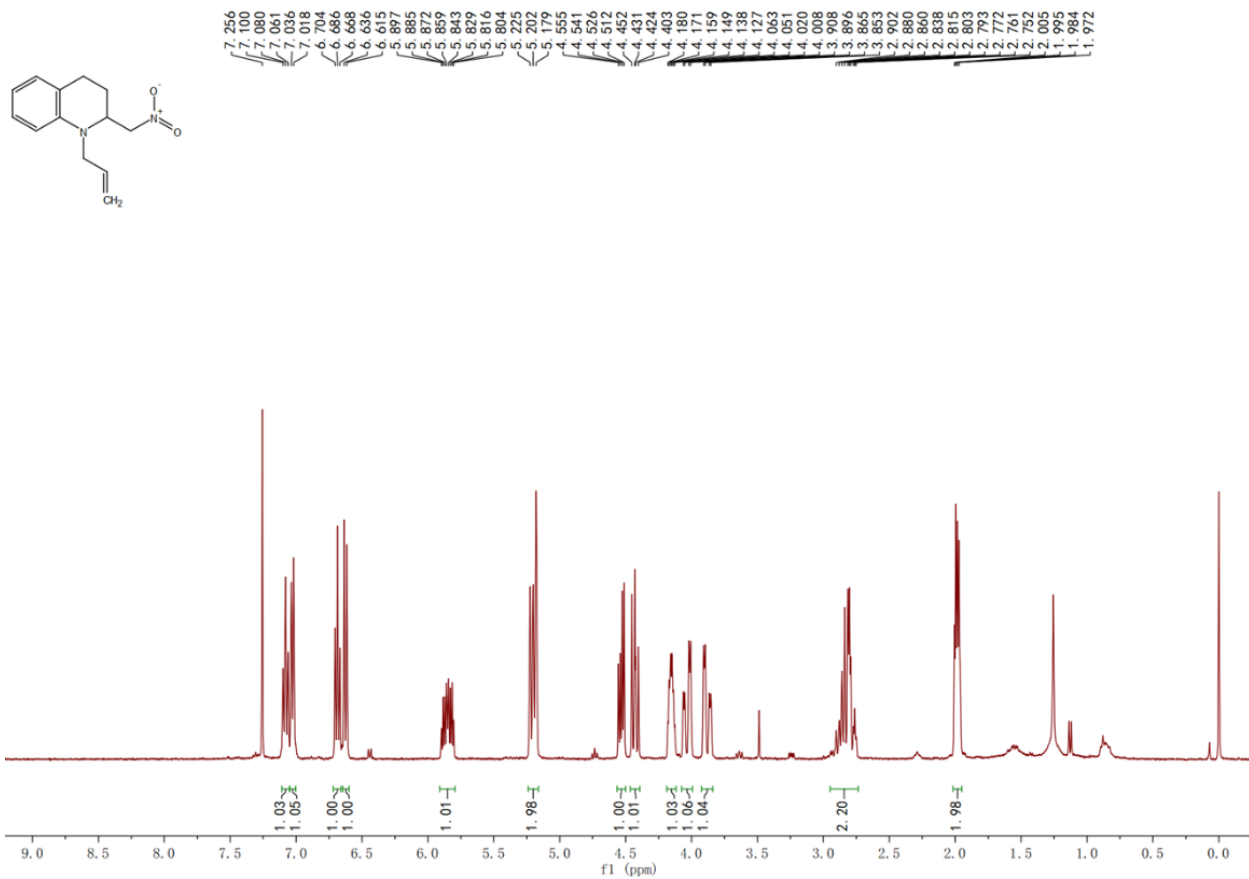

***N*-Allyl-2-nitromethyl-1,2,3,4-tetrahydroquinoline 3c (<sup>13</sup>C-NMR)**

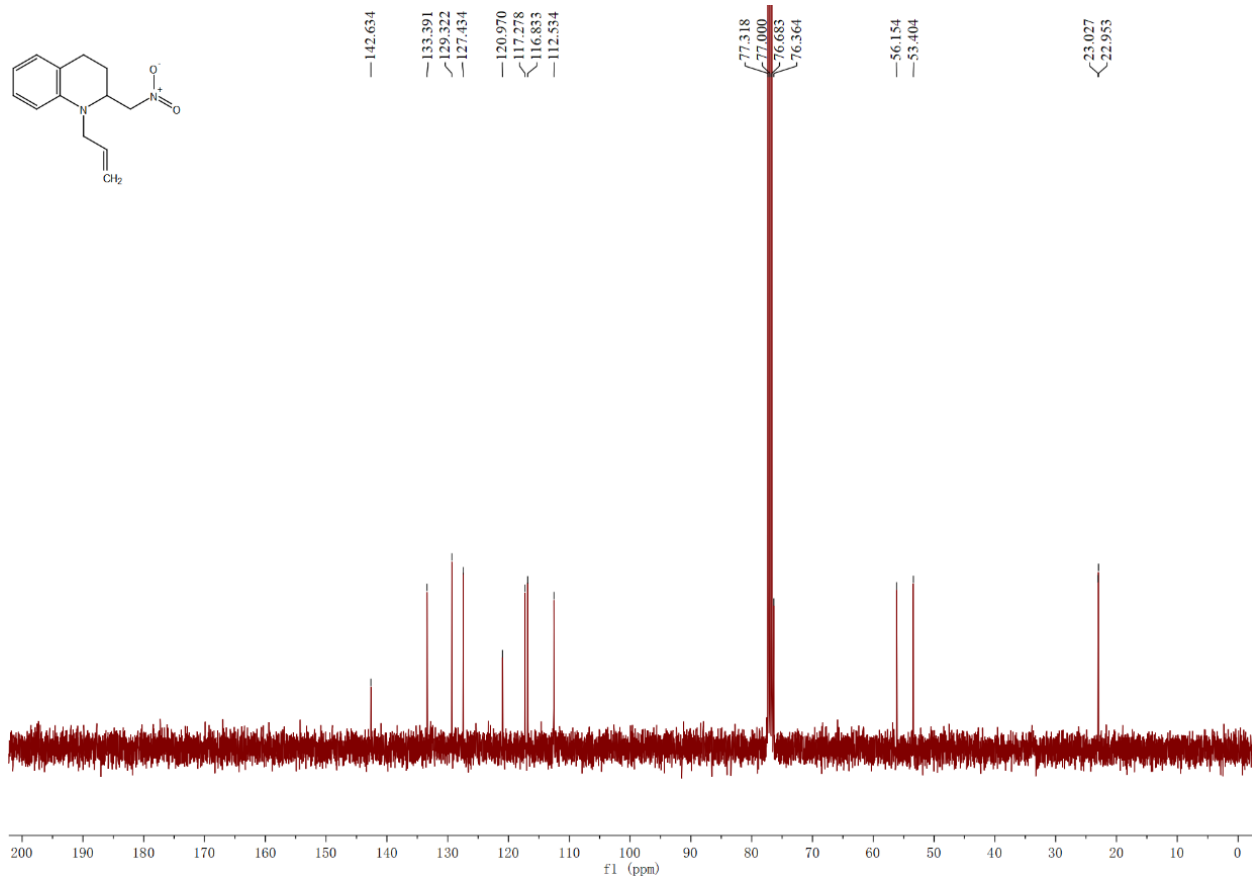

### *N*-Methyl-2-nitromethyl-1,2,3,4-tetrahydroquinoline 3d (<sup>1</sup>H-NMR)

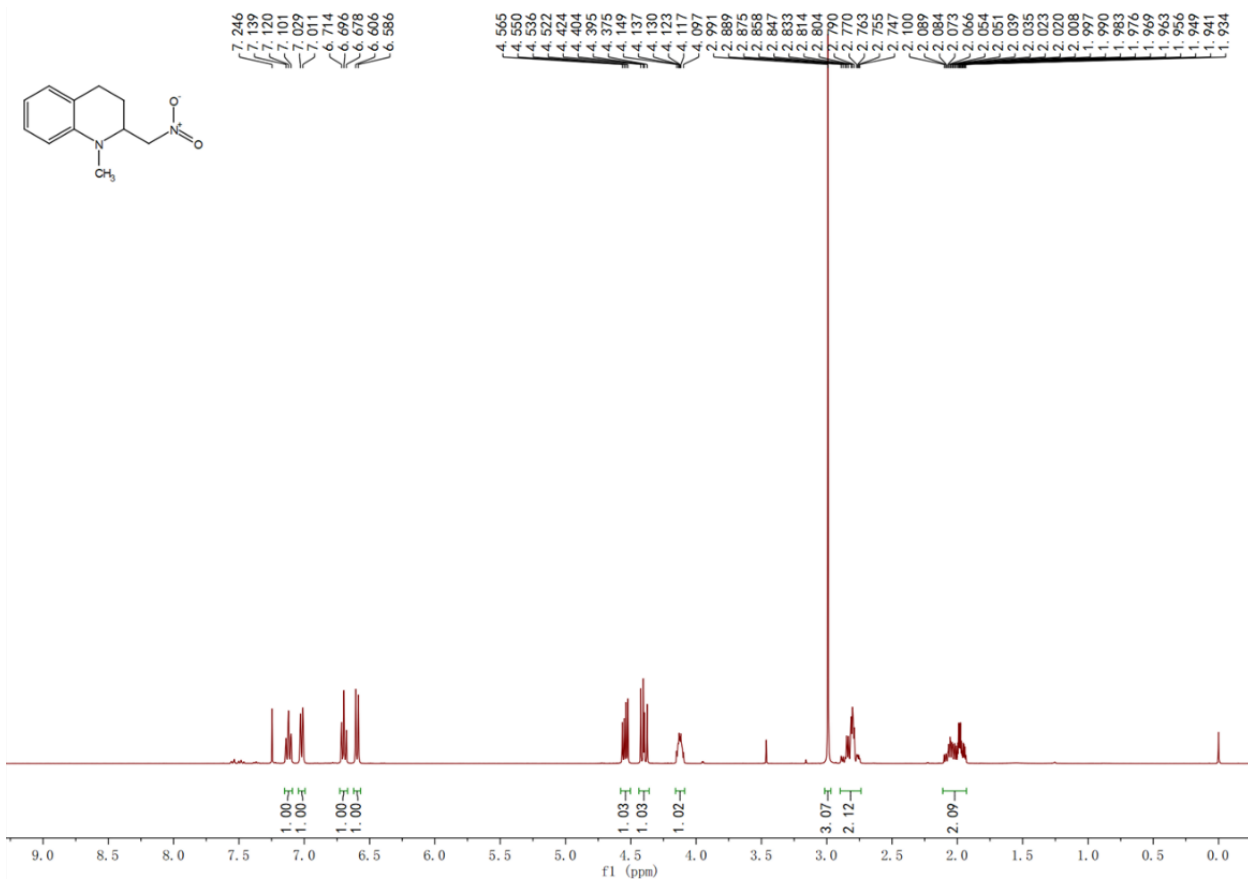

### *N*-Methyl-2-nitromethyl-1,2,3,4-tetrahydroquinoline 3d (<sup>13</sup>C-NMR)

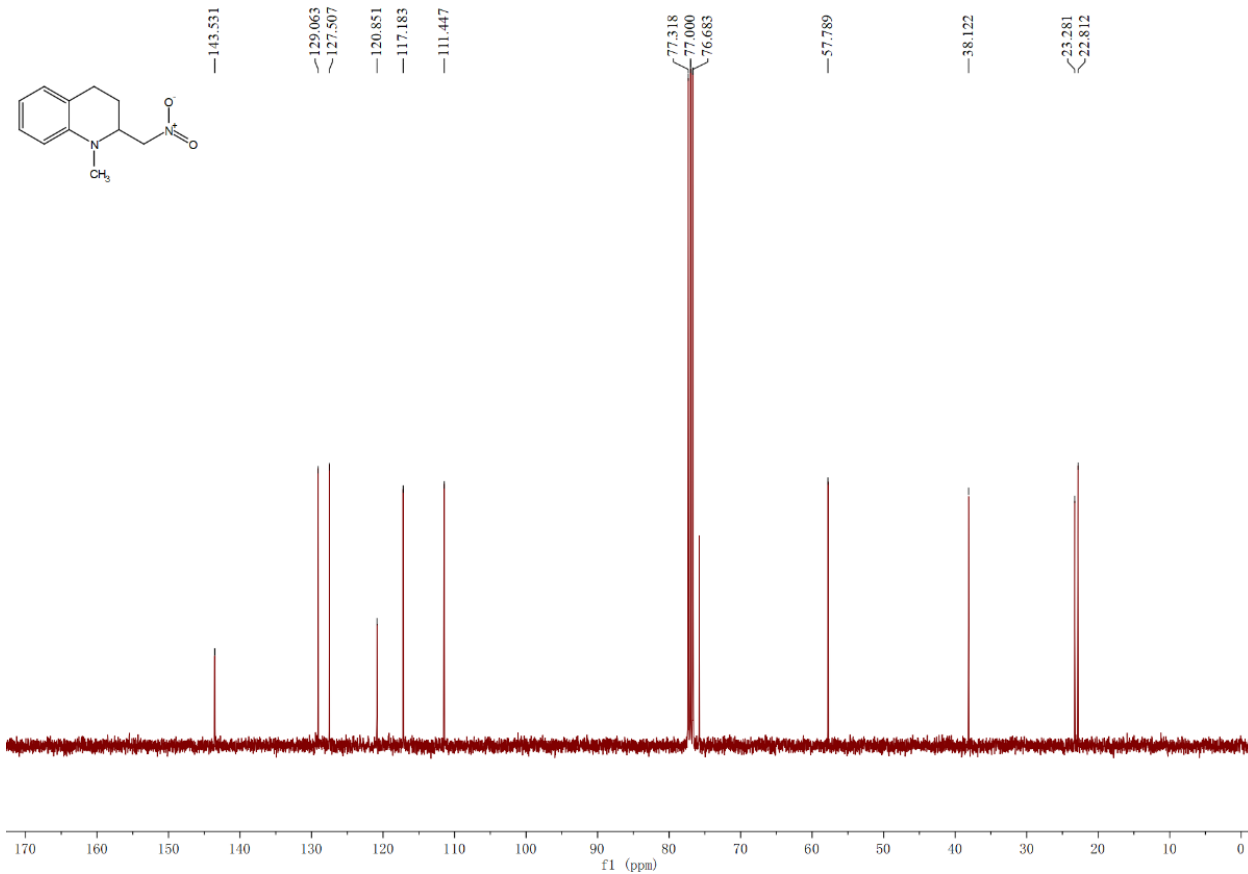

### Ethyl 2-(2-(nitromethyl)-3,4-dihydroquinolin-1(2H)-yl)acetate 3e (<sup>1</sup>H-NMR)

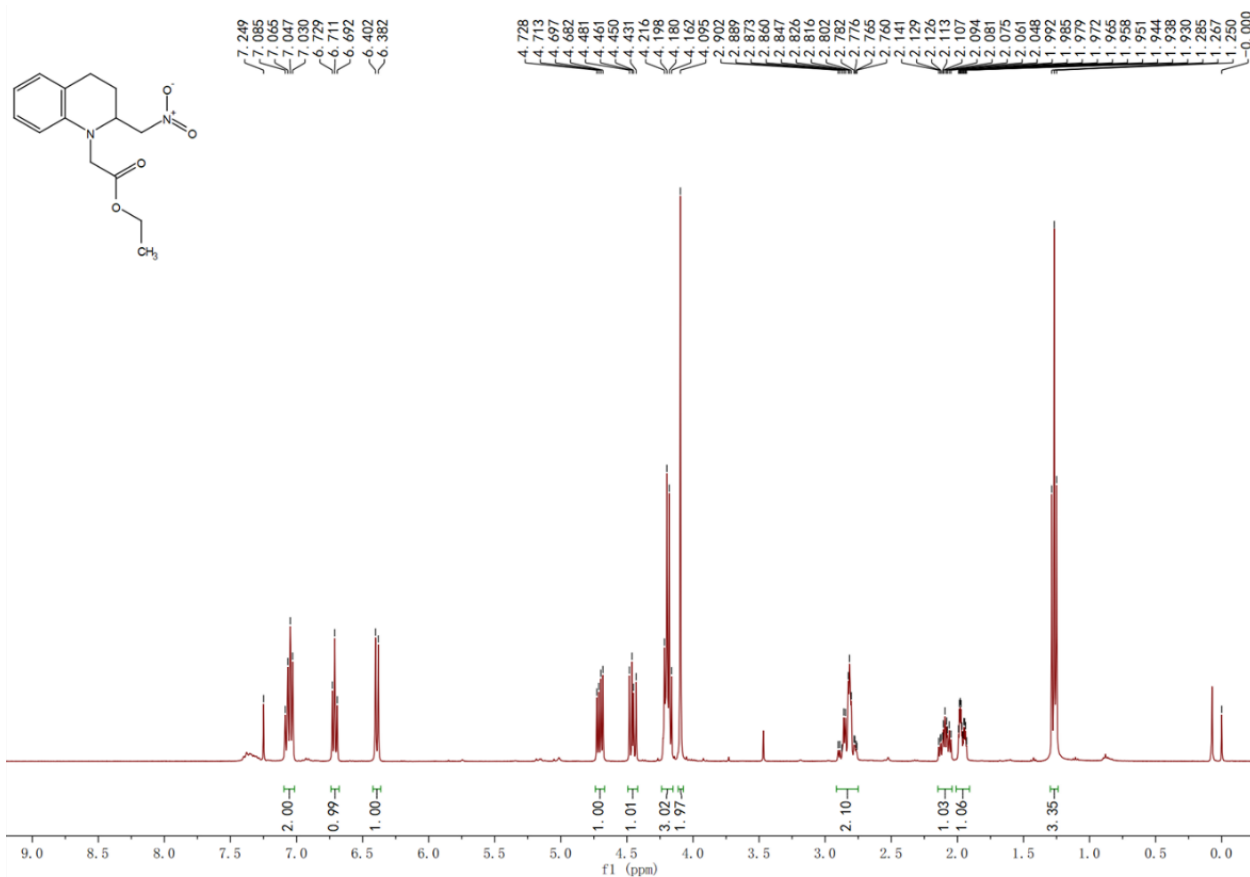

### Ethyl 2-(2-(nitromethyl)-3,4-dihydroquinolin-1(2H)-yl)acetate 3e (<sup>13</sup>C-NMR)

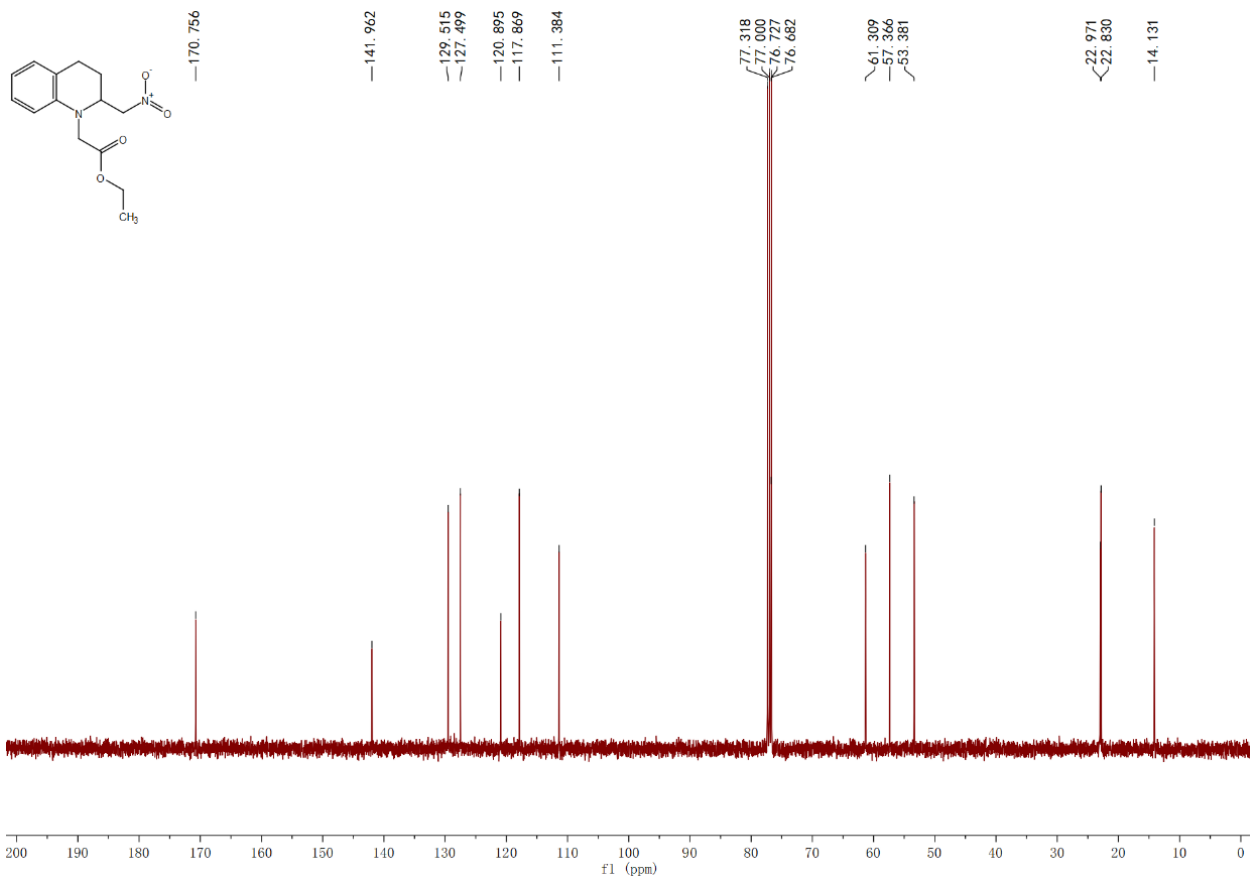

***N*-(2-Chloroethyl)-2-nitromethyl-1,2,3,4-tetrahydroquinoline 3f (<sup>1</sup>H-NMR)**

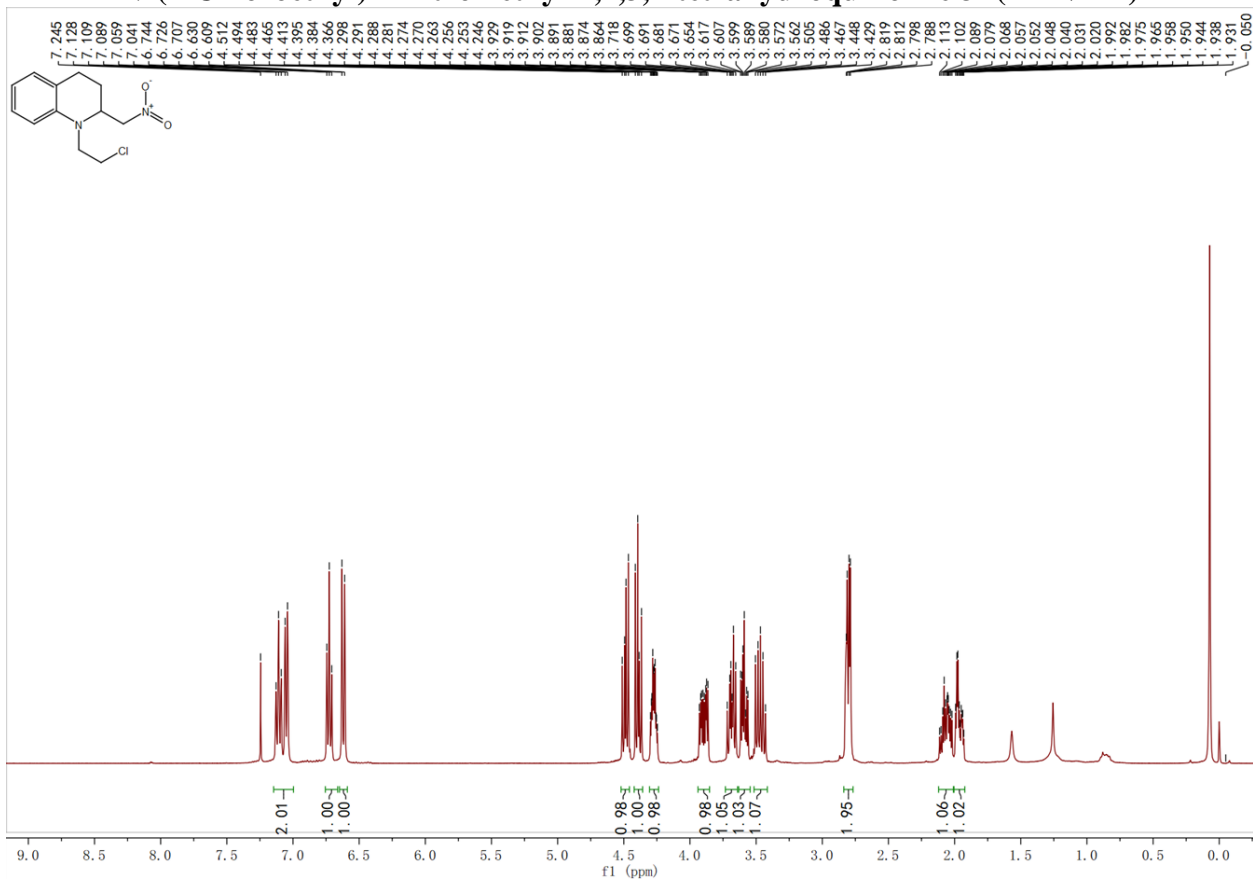

***N*-(2-Chloroethyl)-2-nitromethyl-1,2,3,4-tetrahydroquinoline 3f (<sup>13</sup>C-NMR)**

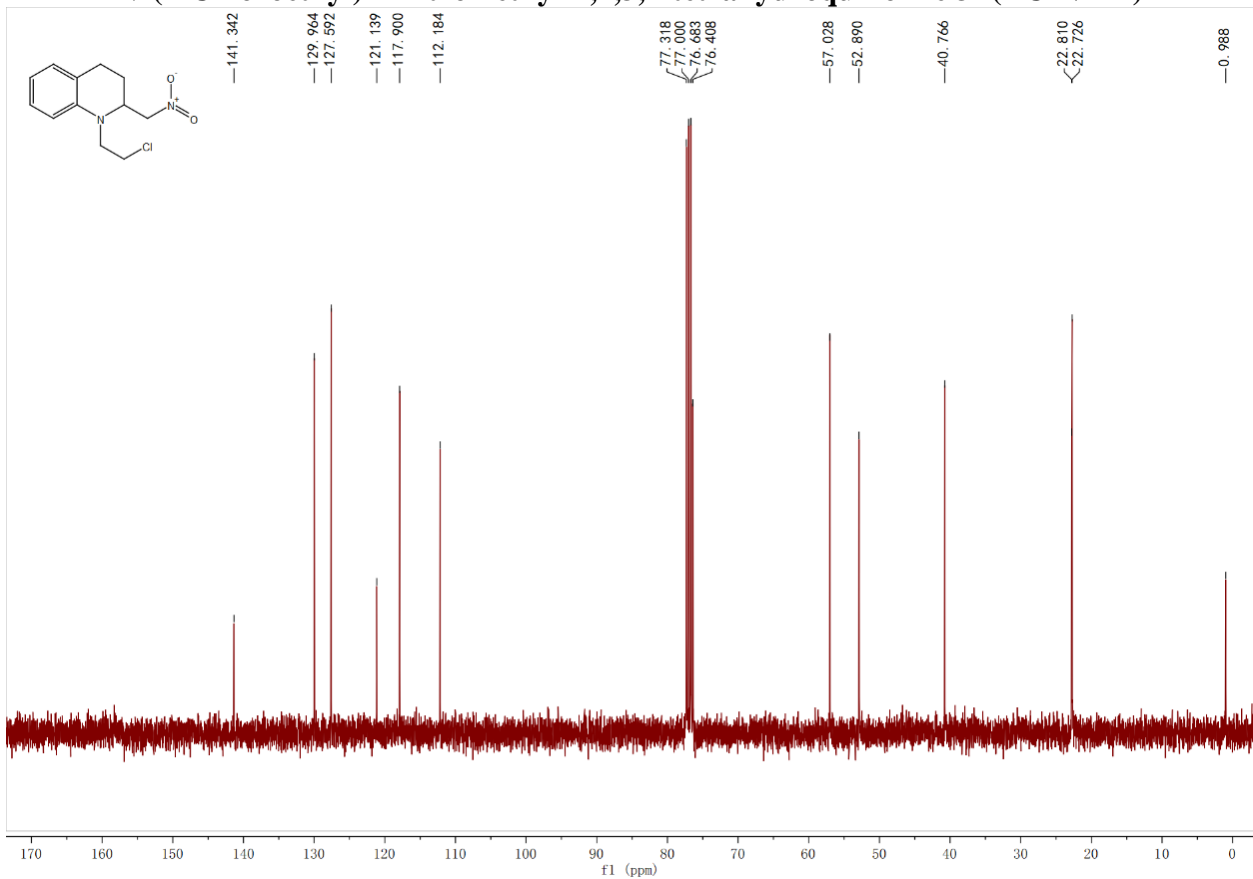

***N*-Benzyl-2-nitromethyl-6-methoxy-1,2,3,4-tetrahydroquinoline 3g (<sup>1</sup>H-NMR)**

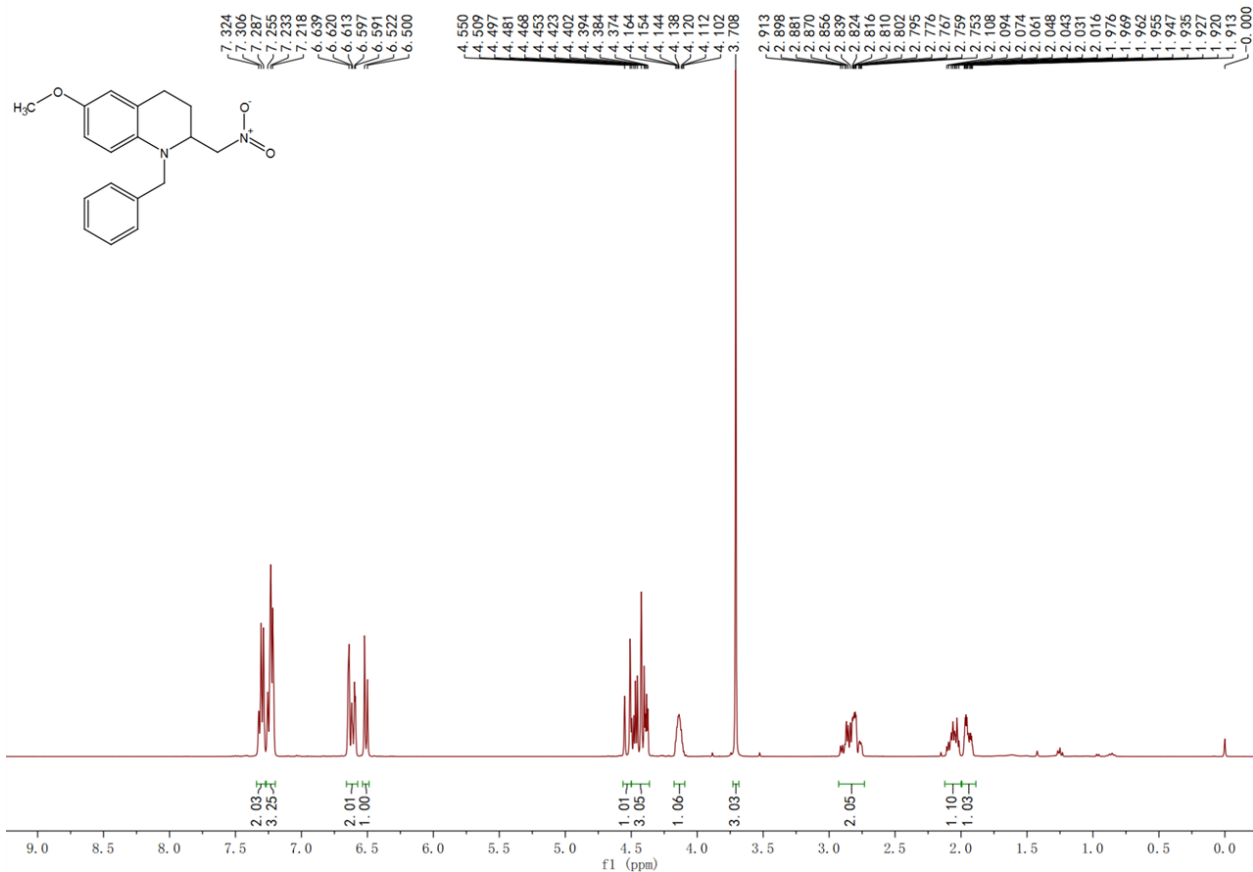

***N*-Benzyl-2-nitromethyl-6-methoxy-1,2,3,4-tetrahydroquinoline 3g (<sup>13</sup>C-NMR)**

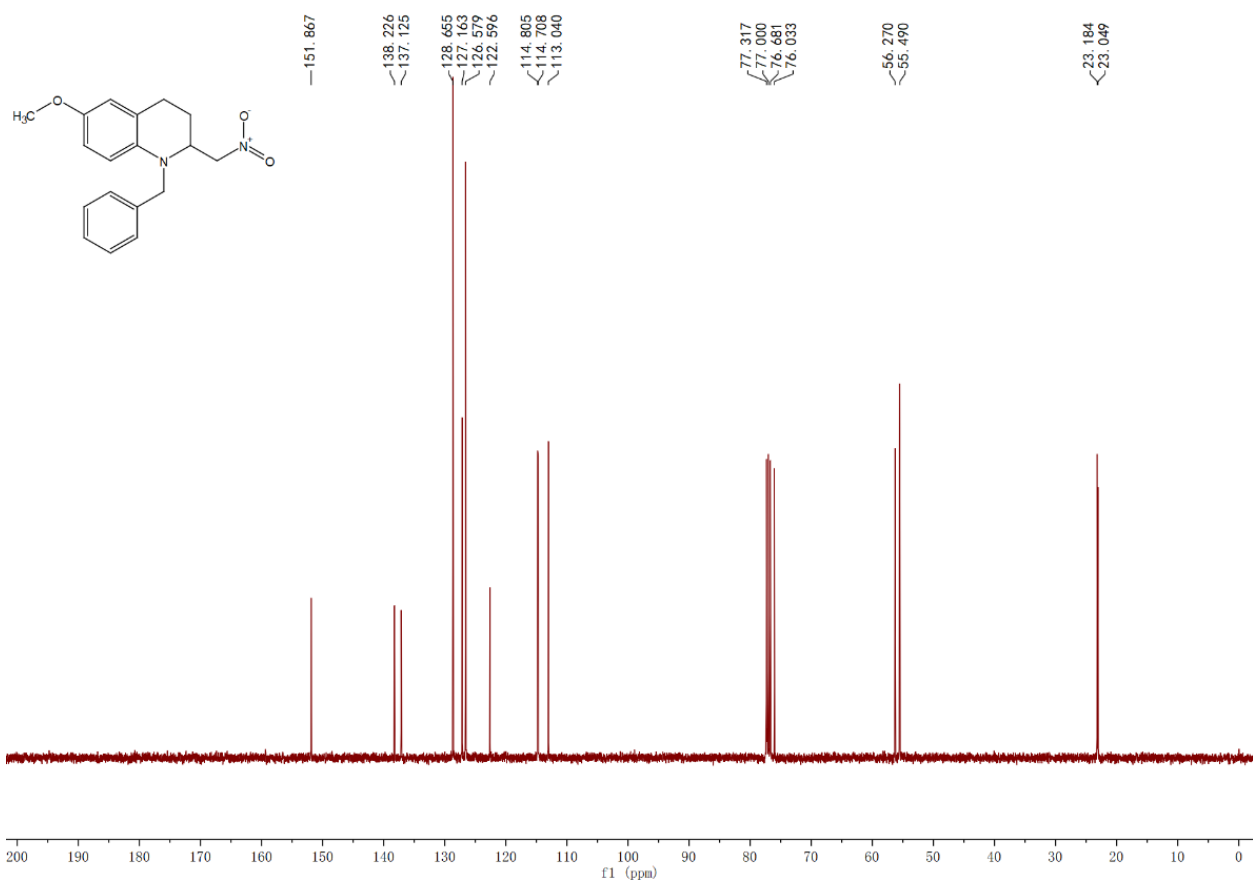



***N*-Benzyl-2-nitromethyl-6-methyl-1,2,3,4-tetrahydroquinoline 3h (<sup>1</sup>H-NMR)**

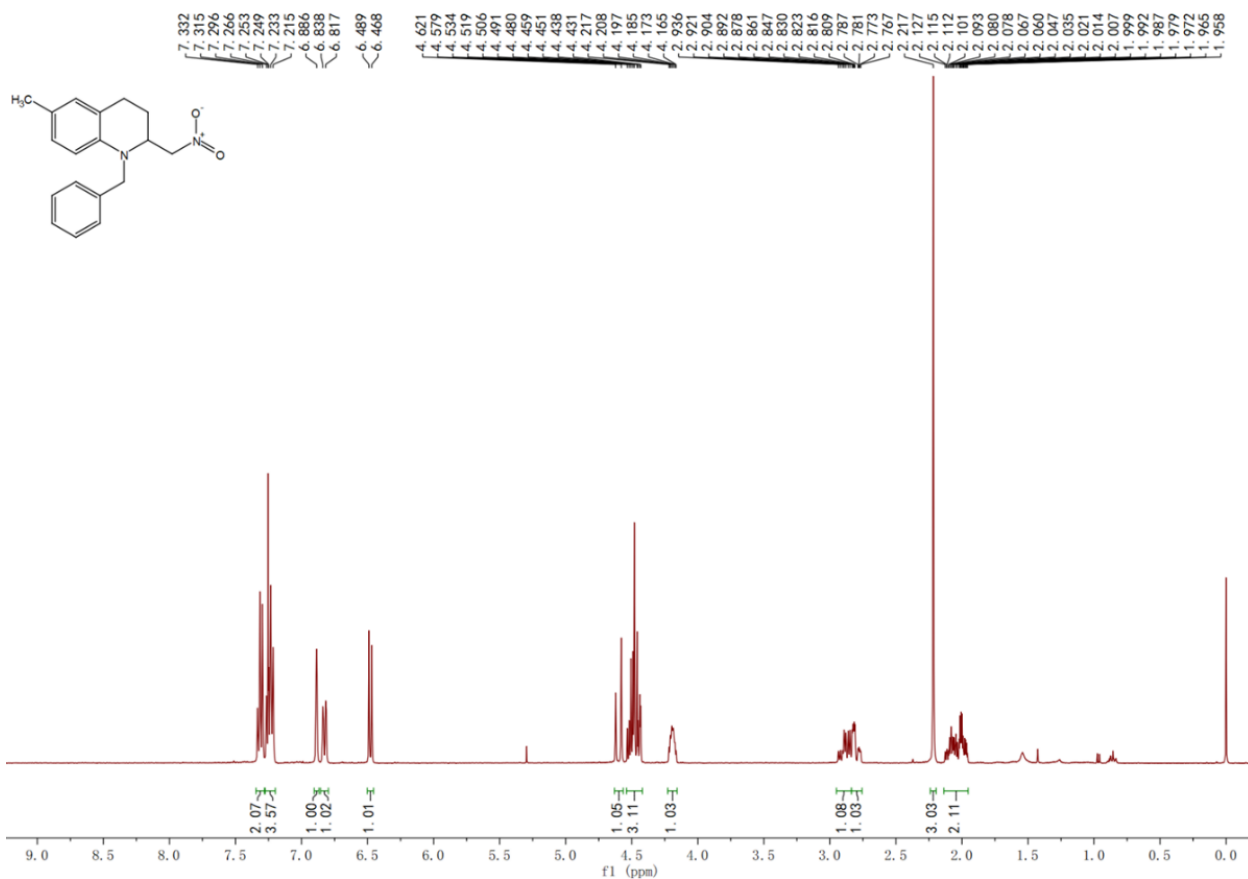

***N*-Benzyl-2-nitromethyl-6-methyl-1,2,3,4-tetrahydroquinoline 3h (<sup>13</sup>C-NMR)**

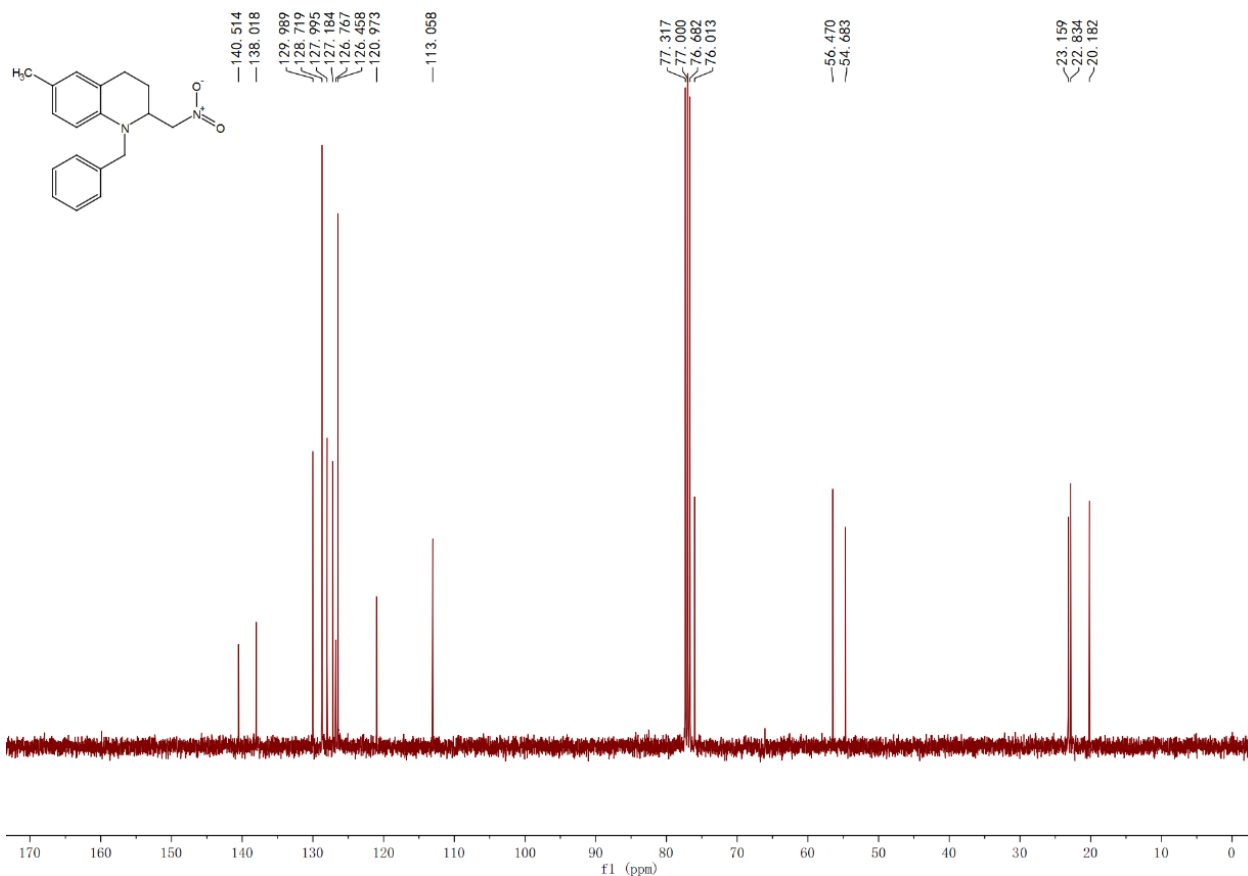

***N*-Benzyl-2-nitromethyl-6-fluoro-1,2,3,4-tetrahydroquinoline 3i (<sup>1</sup>H-NMR)**

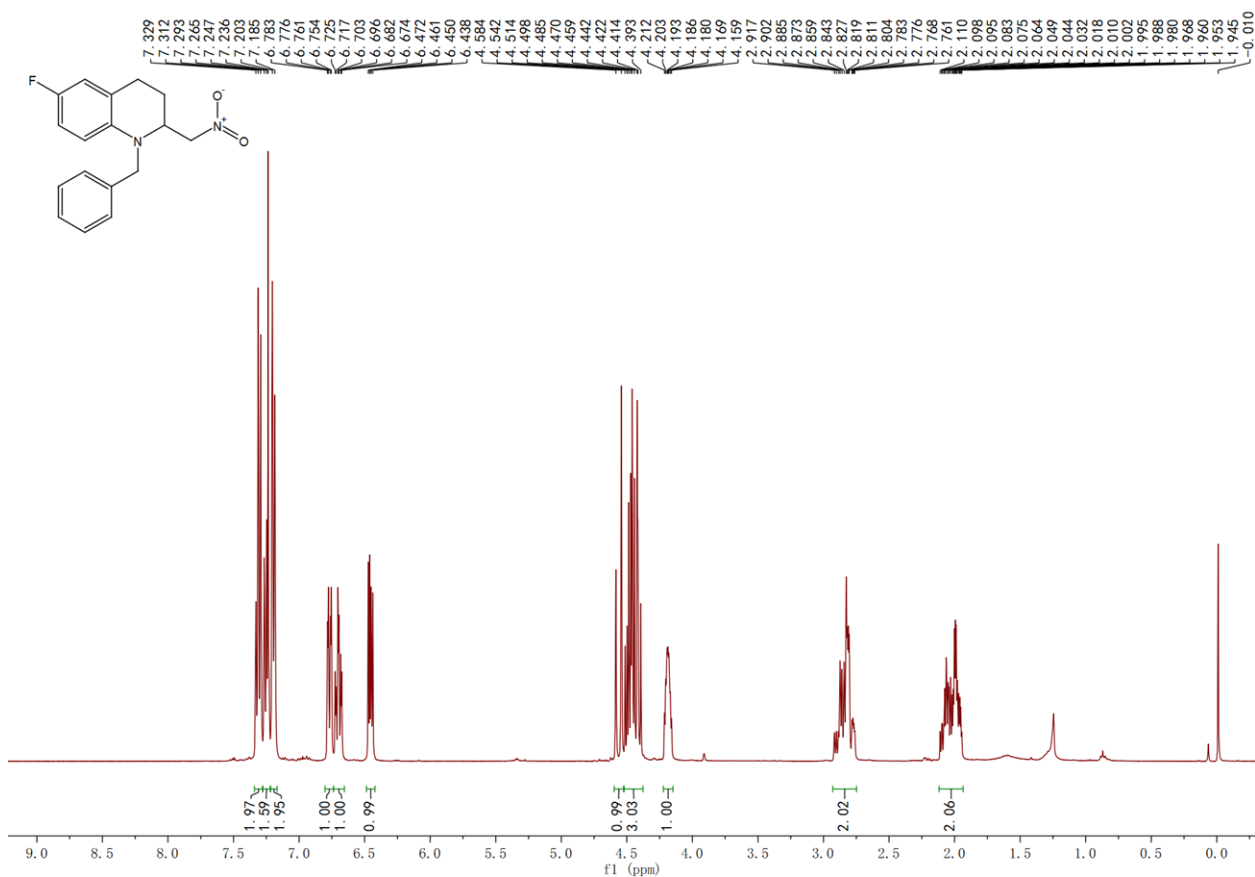

***N*-Benzyl-2-nitromethyl-6-fluoro-1,2,3,4-tetrahydroquinoline 3i (<sup>13</sup>C-NMR)**

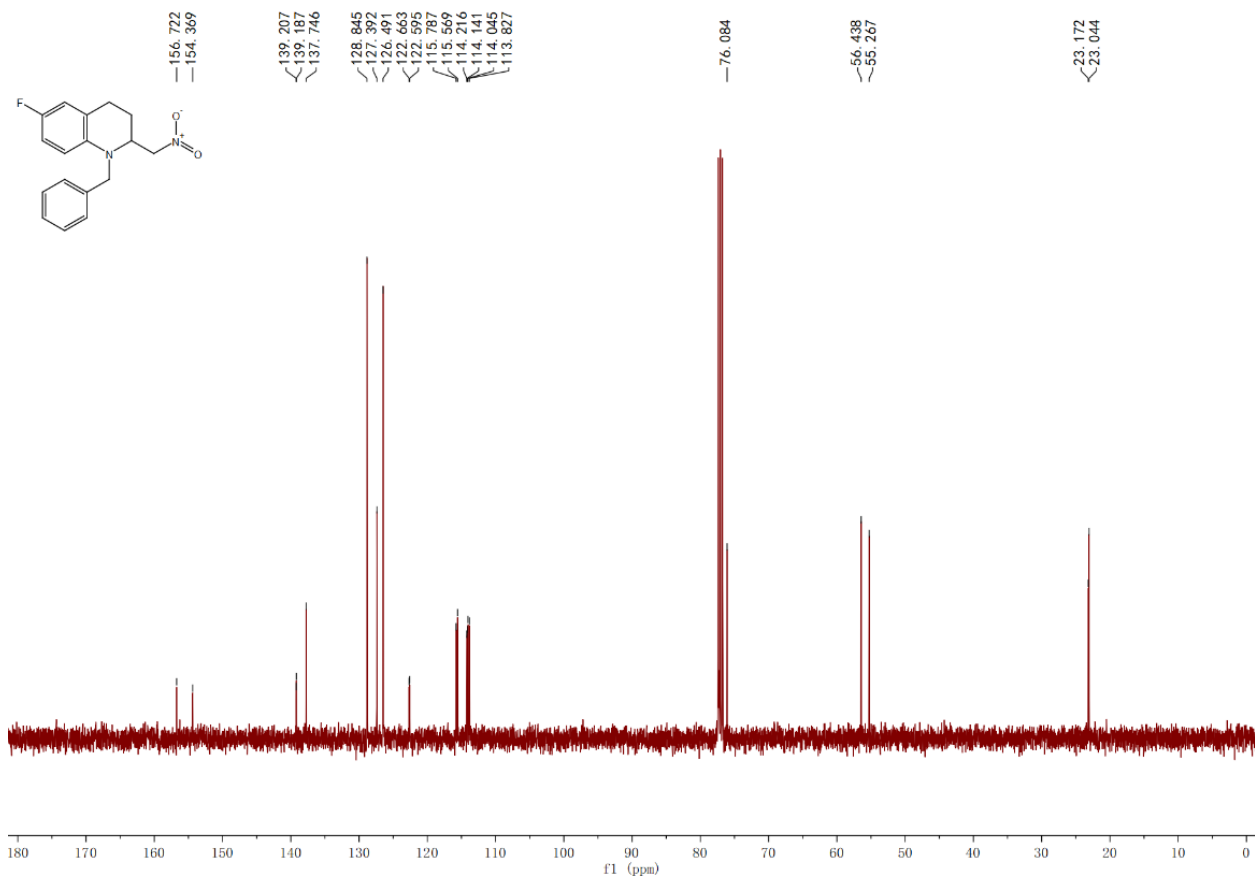

***N*-Benzyl-2-nitromethyl-6-chloro-1,2,3,4-tetrahydroquinoline 3j (<sup>1</sup>H-NMR)**

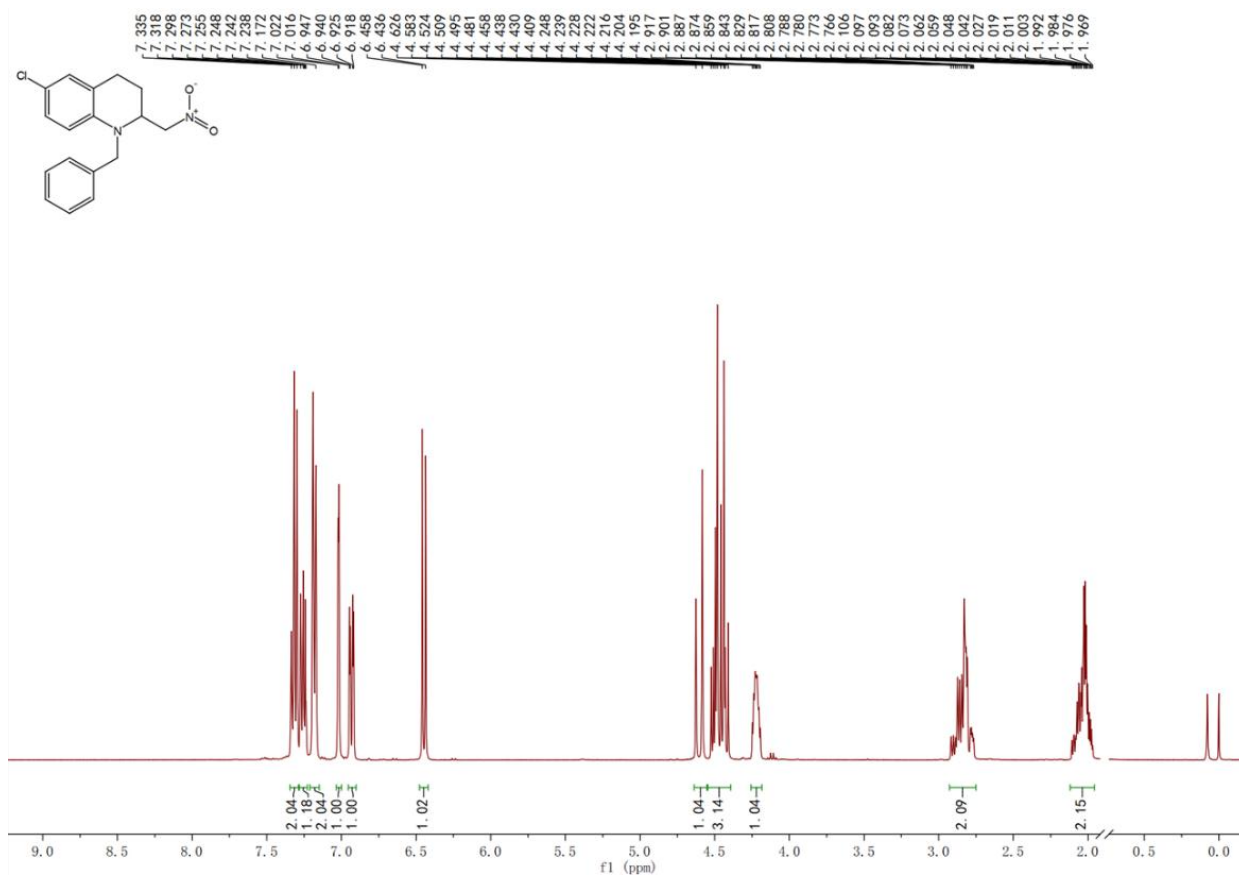

***N*-Benzyl-2-nitromethyl-6-chloro-1,2,3,4-tetrahydroquinoline 3j (<sup>13</sup>C-NMR)**

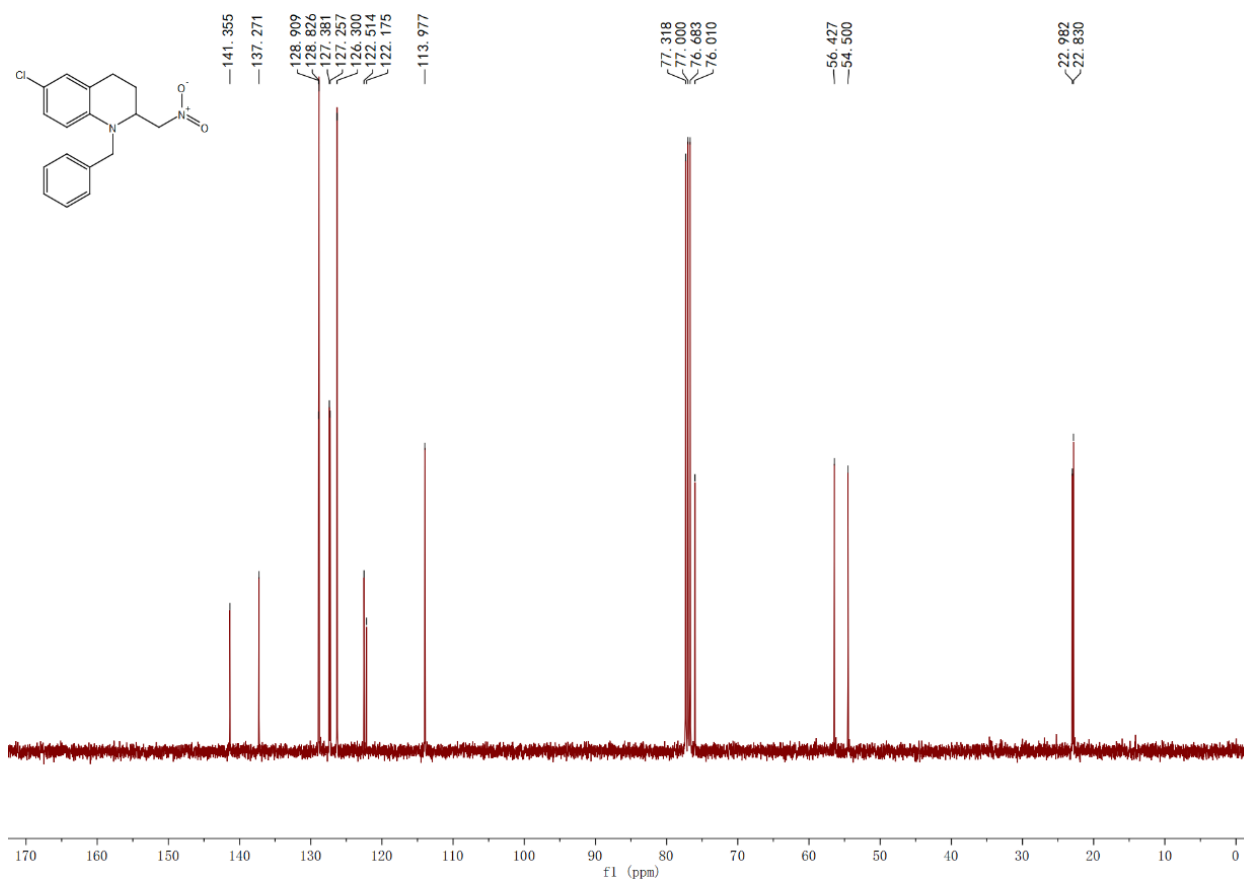

***N*-Benzyl-2-nitromethyl-4-phenyl-1,2,3,4-tetrahydroquinoline 3k (<sup>1</sup>H-NMR)**

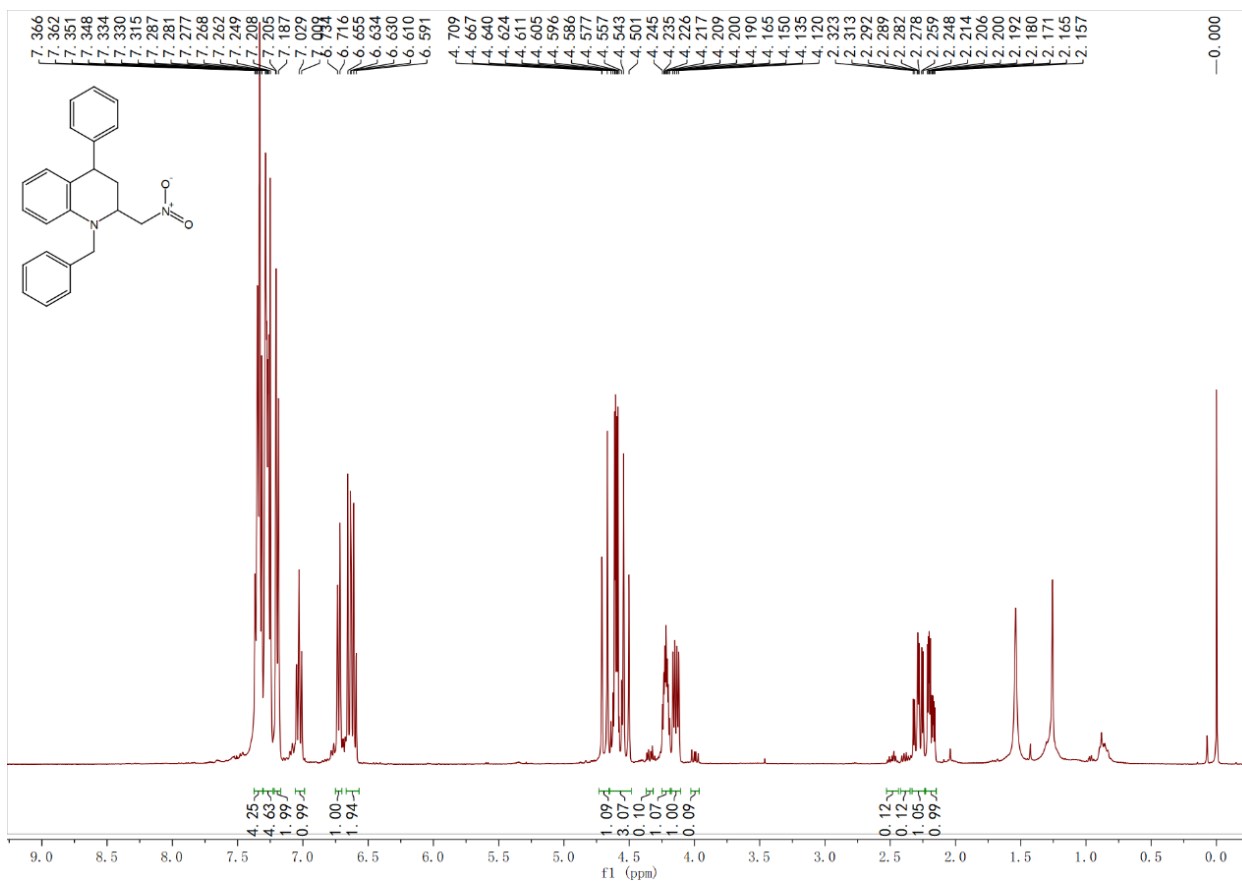

***N*-Benzyl-2-nitromethyl-4-phenyl-1,2,3,4-tetrahydroquinoline 3k (<sup>13</sup>C-NMR)**

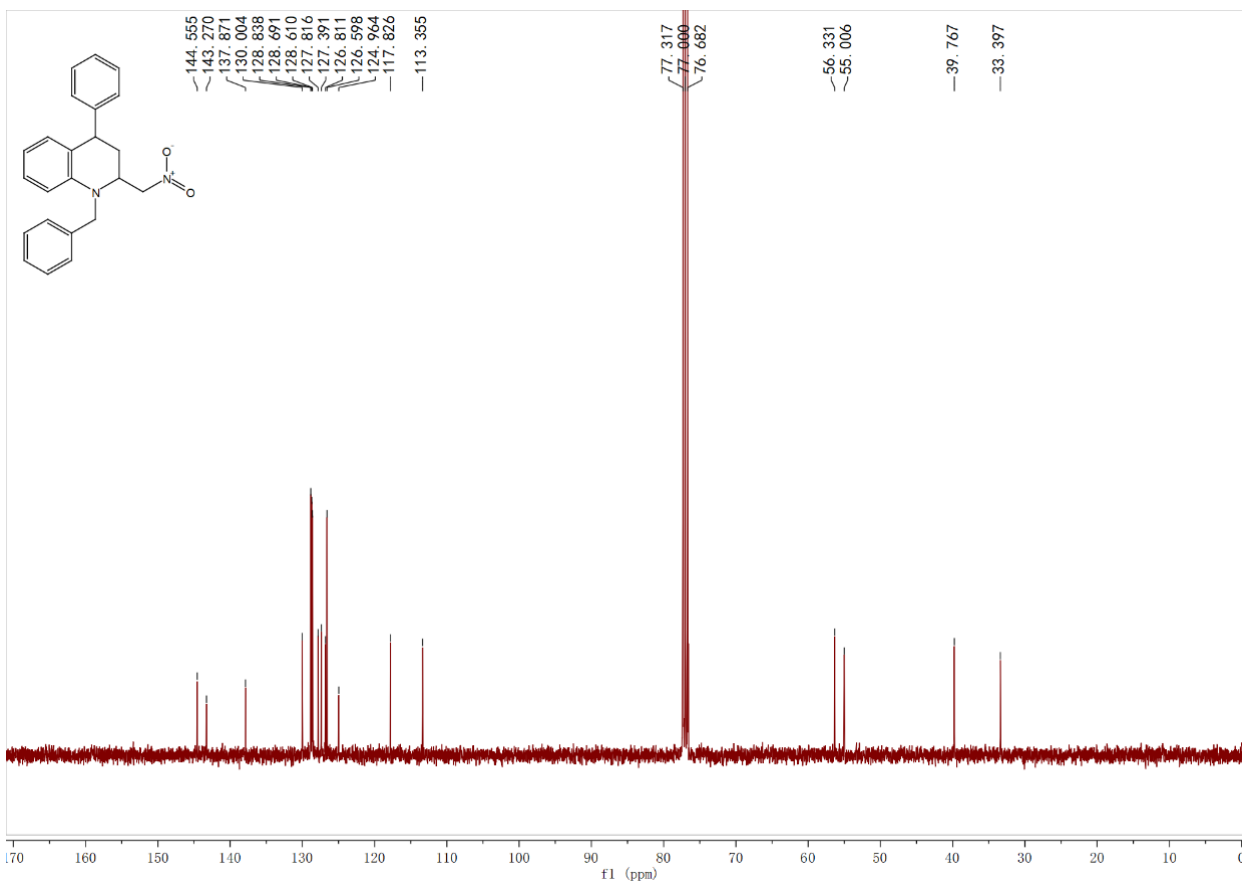

***N*-Benzyl-2-nitromethyl-4-*n*-butyl-1,2,3,4-tetrahydroquinoline 3l (<sup>1</sup>H-NMR)**

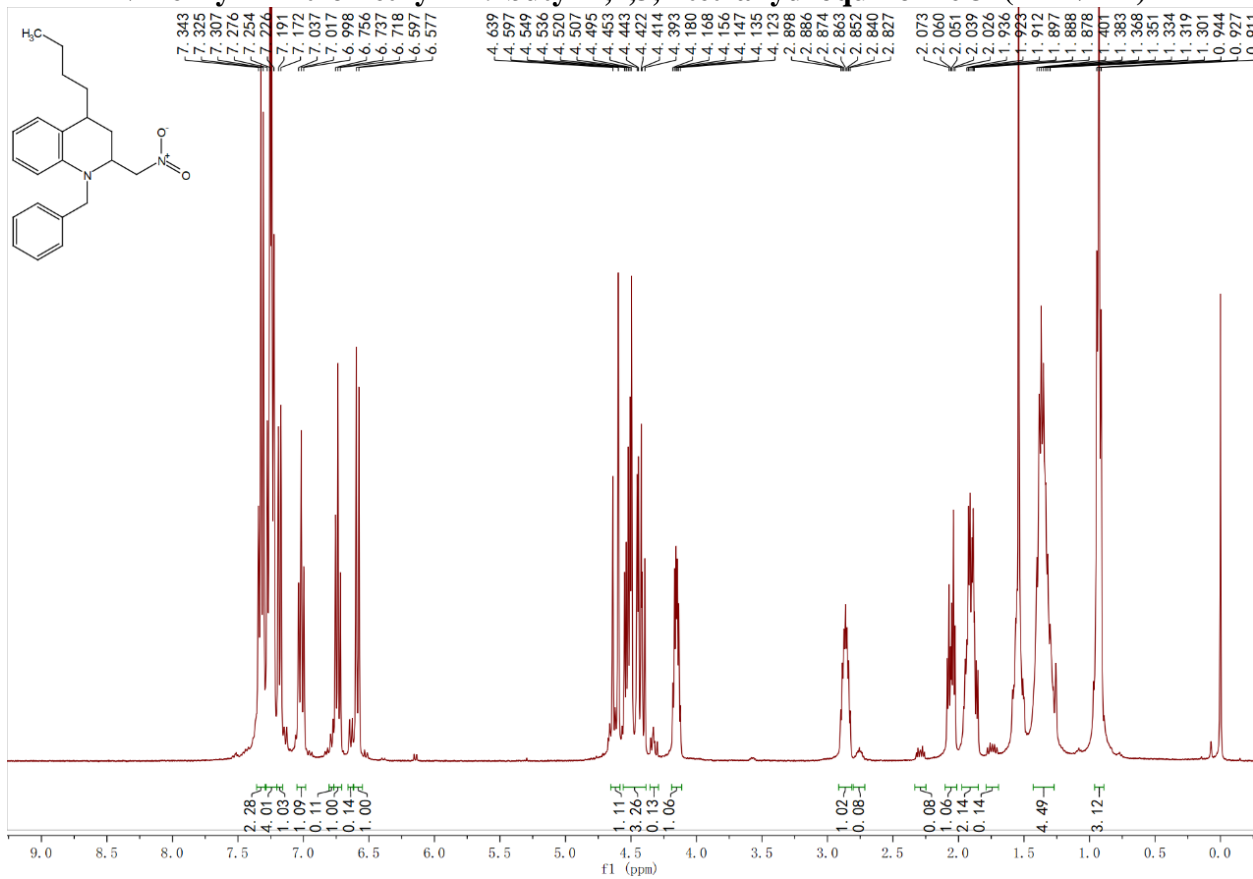

***N*-Benzyl-2-nitromethyl-4-*n*-butyl-1,2,3,4-tetrahydroquinoline 3l (<sup>13</sup>C-NMR)**

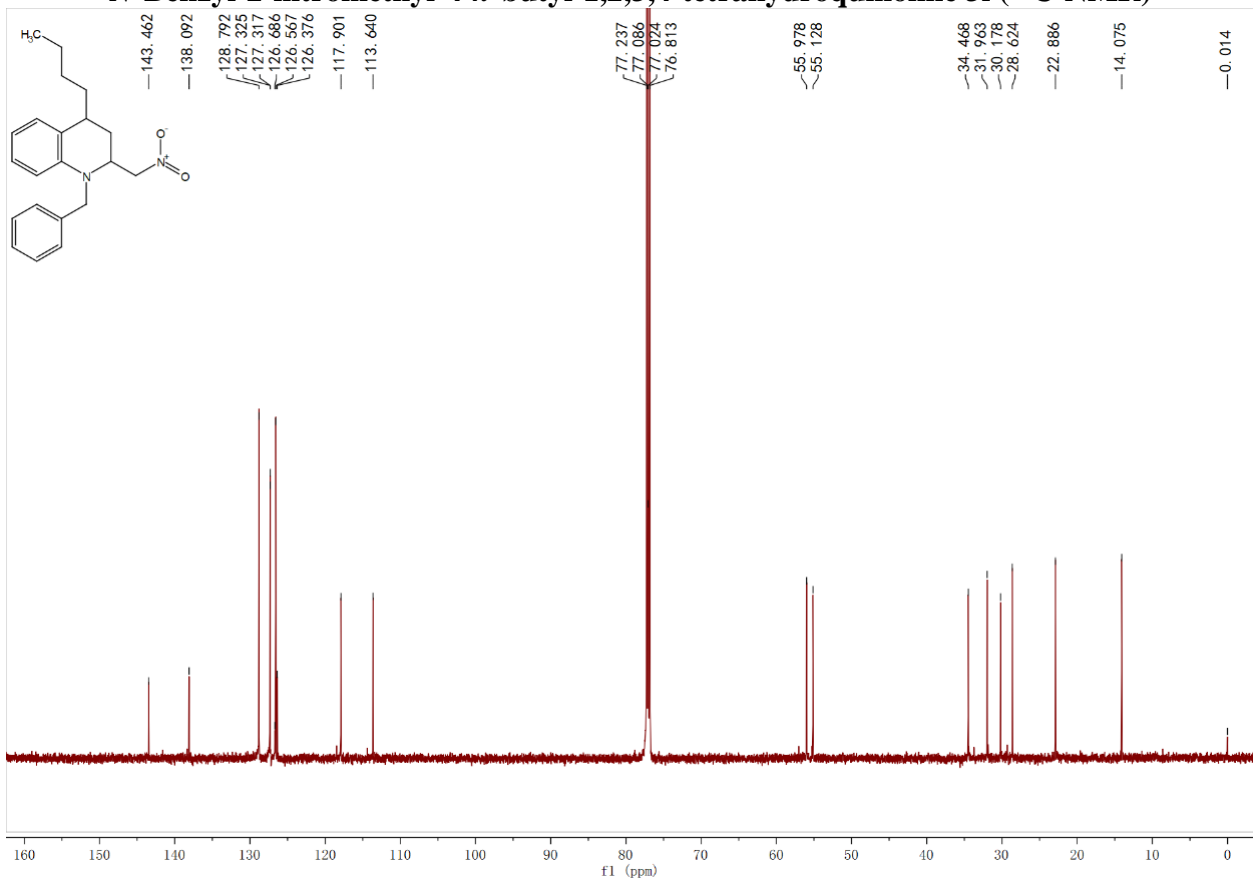

***N*-Benzyl-2-nitromethyl-4-Methyl-1,2,3,4-tetrahydroquinoline 3m (<sup>1</sup>H-NMR)**

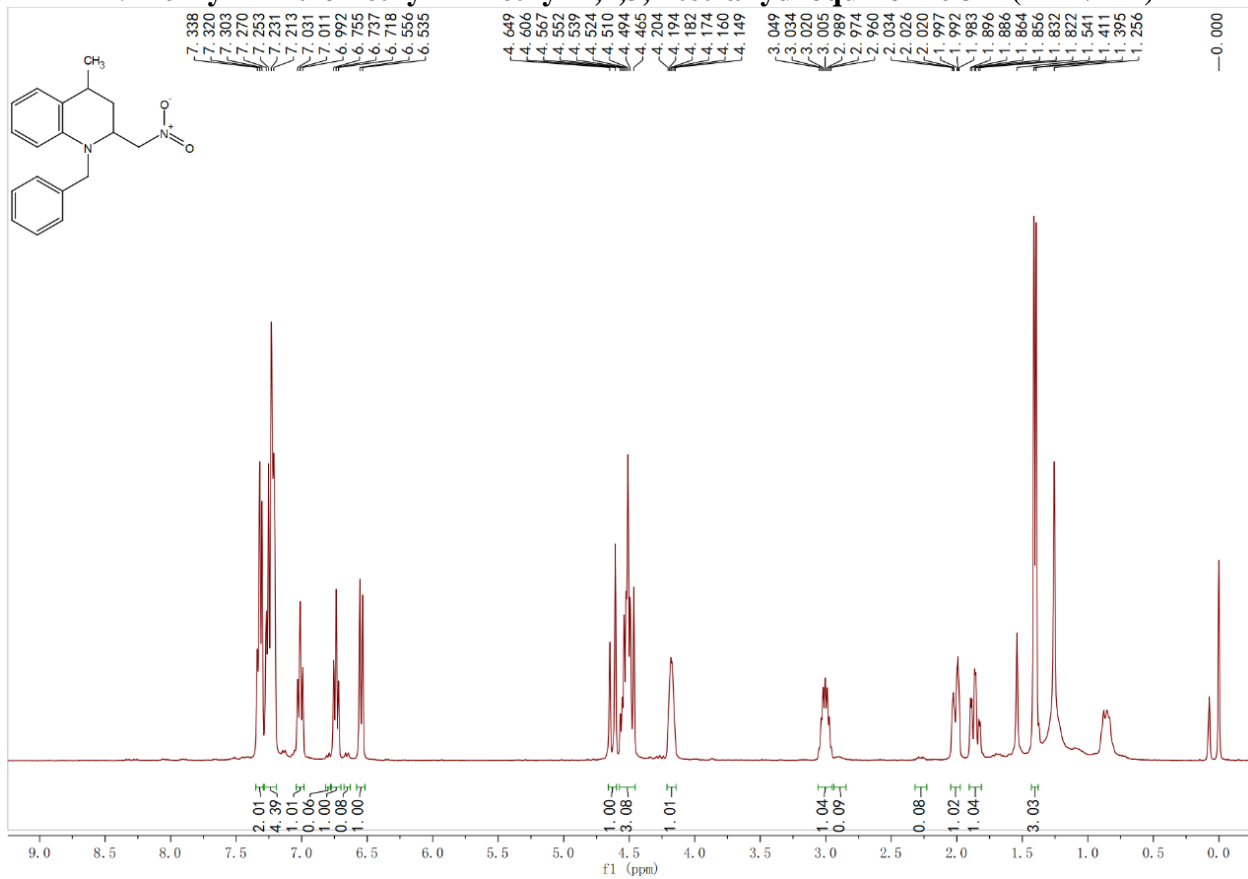

***N*-Benzyl-2-nitromethyl-4-Methyl-1,2,3,4-tetrahydroquinoline 3m (<sup>13</sup>C-NMR)**

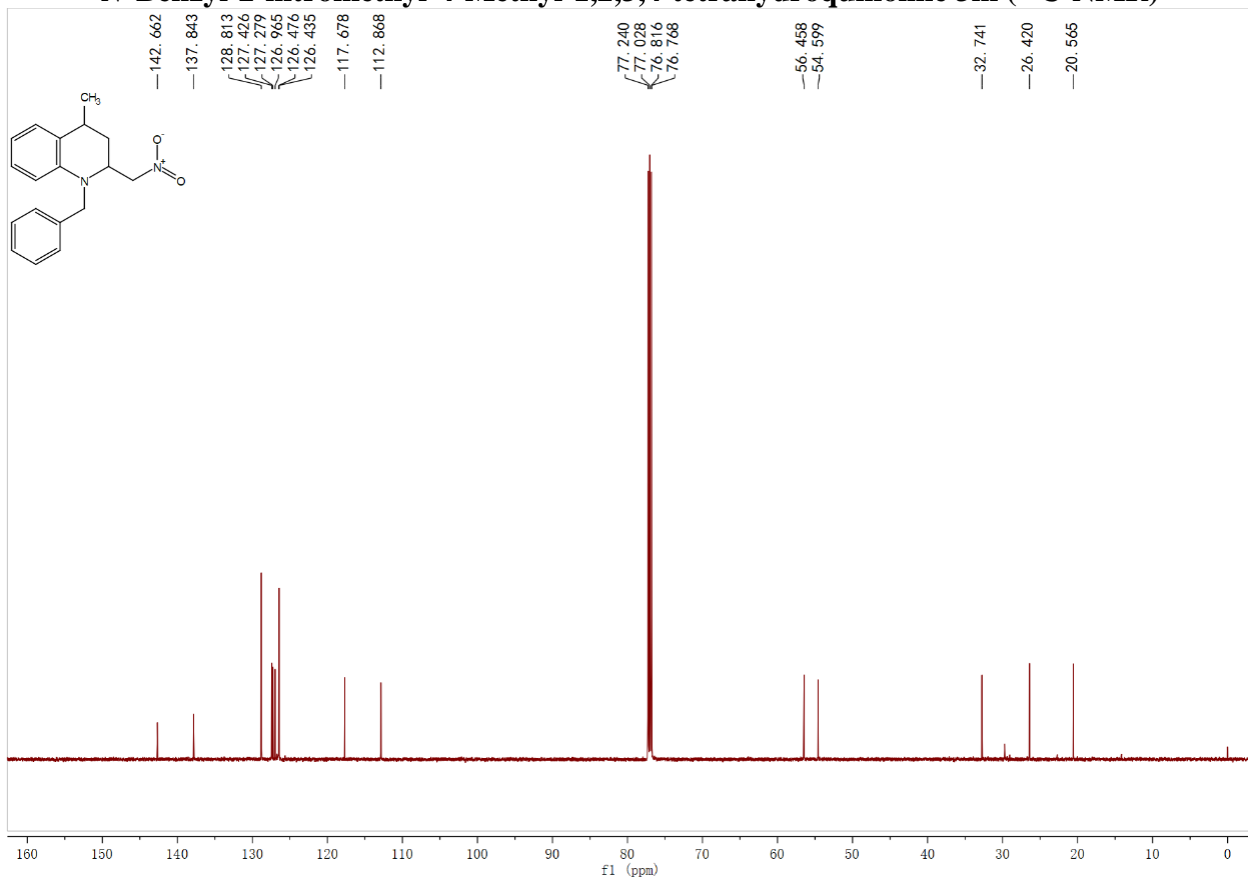

### *N*-Benzyl-2-methyleneamino-1,2,3,4-tetrahydroquinoline 4 (<sup>1</sup>H-NMR)

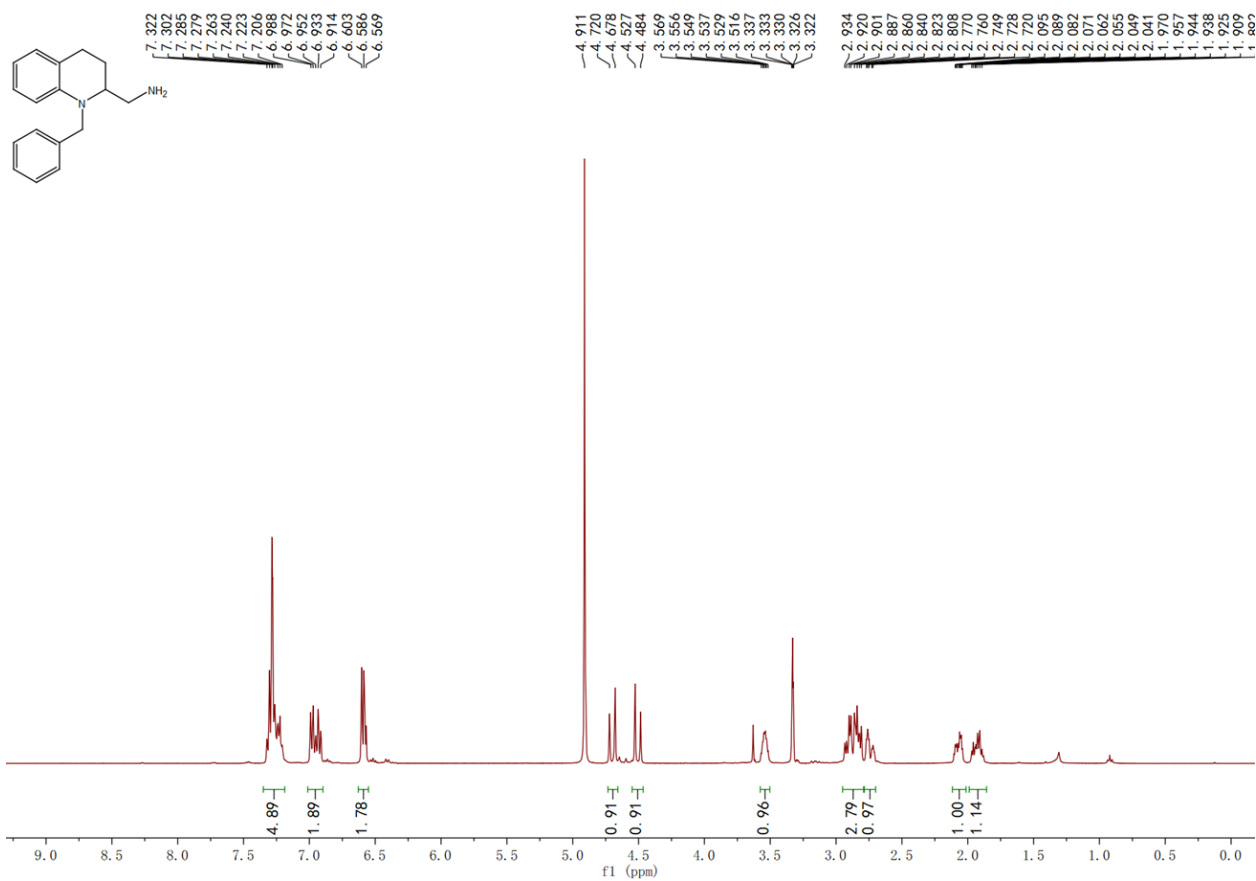

### *N*-Benzyl-2-methyleneamino-1,2,3,4-tetrahydroquinoline 4 (<sup>13</sup>C-NMR)

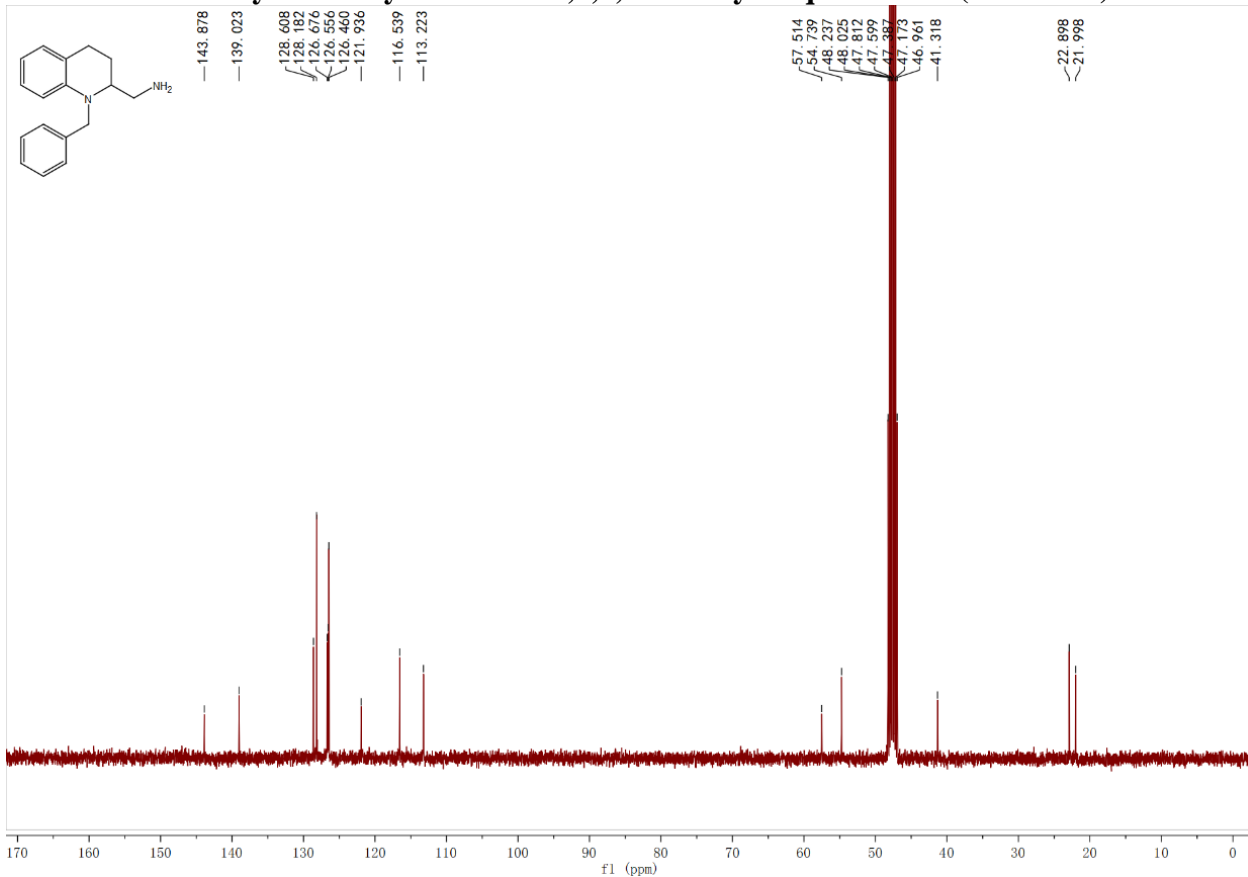

***N*-[(1-Benzyl-1,2,3,4-tetrahydroquinolin-2-yl)methyl]acetamide 5 (<sup>1</sup>H-NMR).**

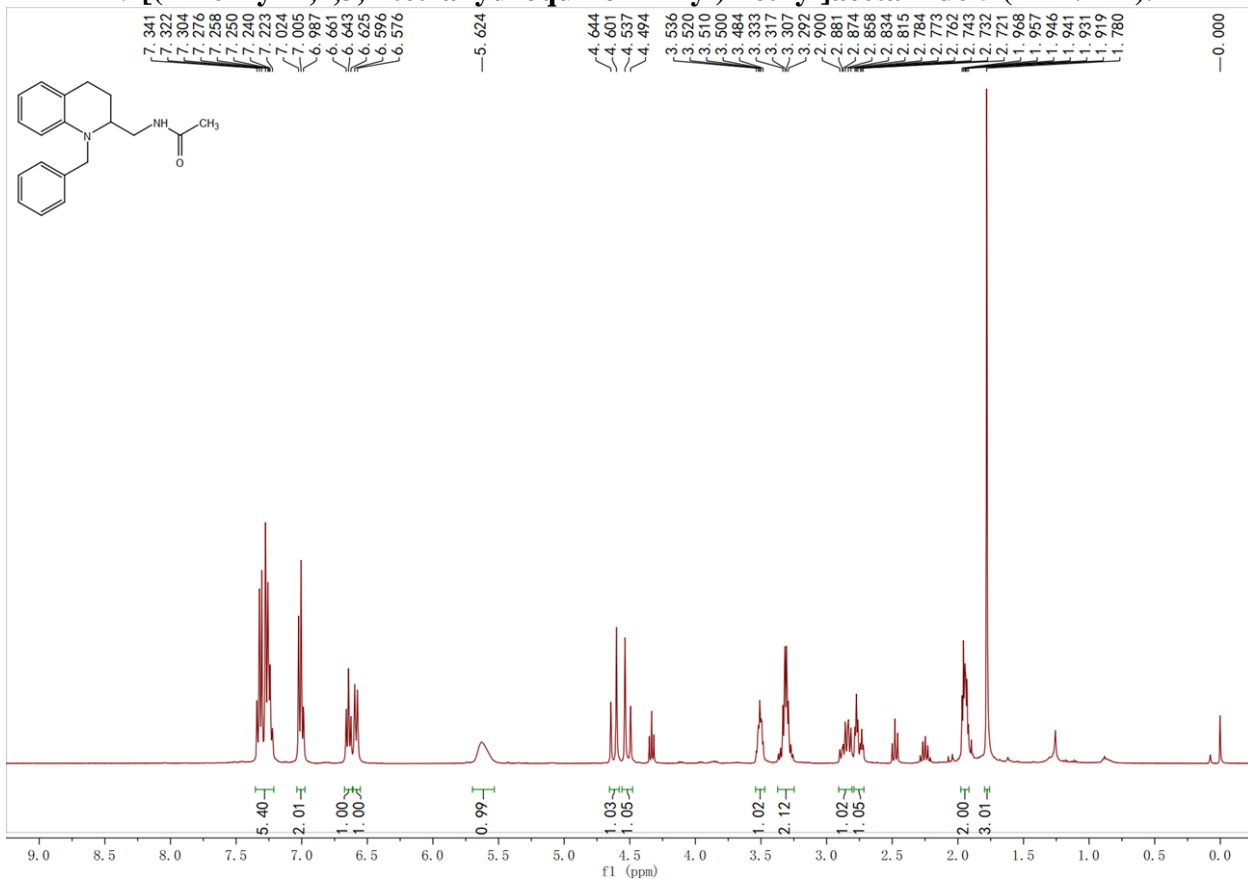

***N*-[(1-Benzyl-1,2,3,4-tetrahydroquinolin-2-yl)methyl]acetamide 5 (<sup>13</sup>C-NMR).**

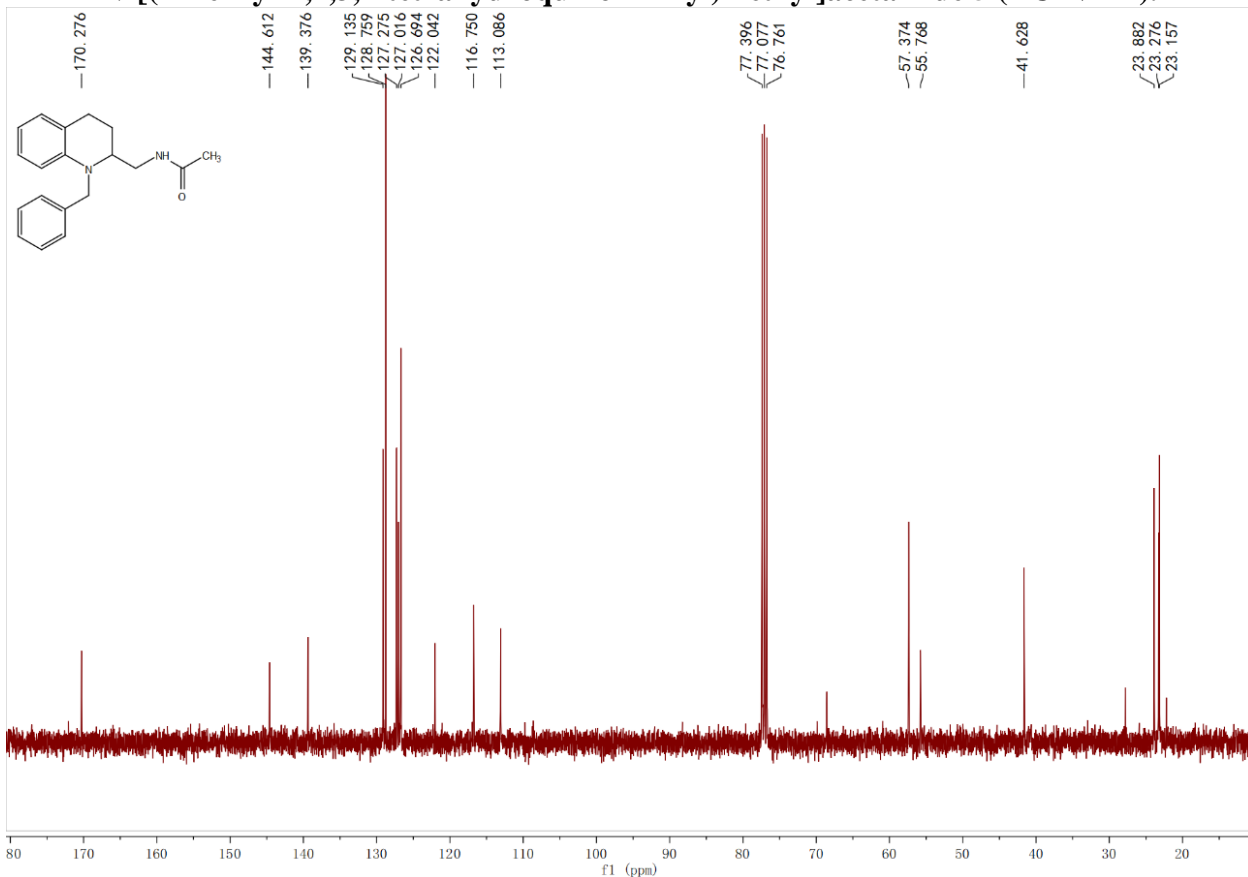



## 2-Methyleneamino-1,2,3,4-tetrahydroquinoline 6 (<sup>1</sup>H-NMR)

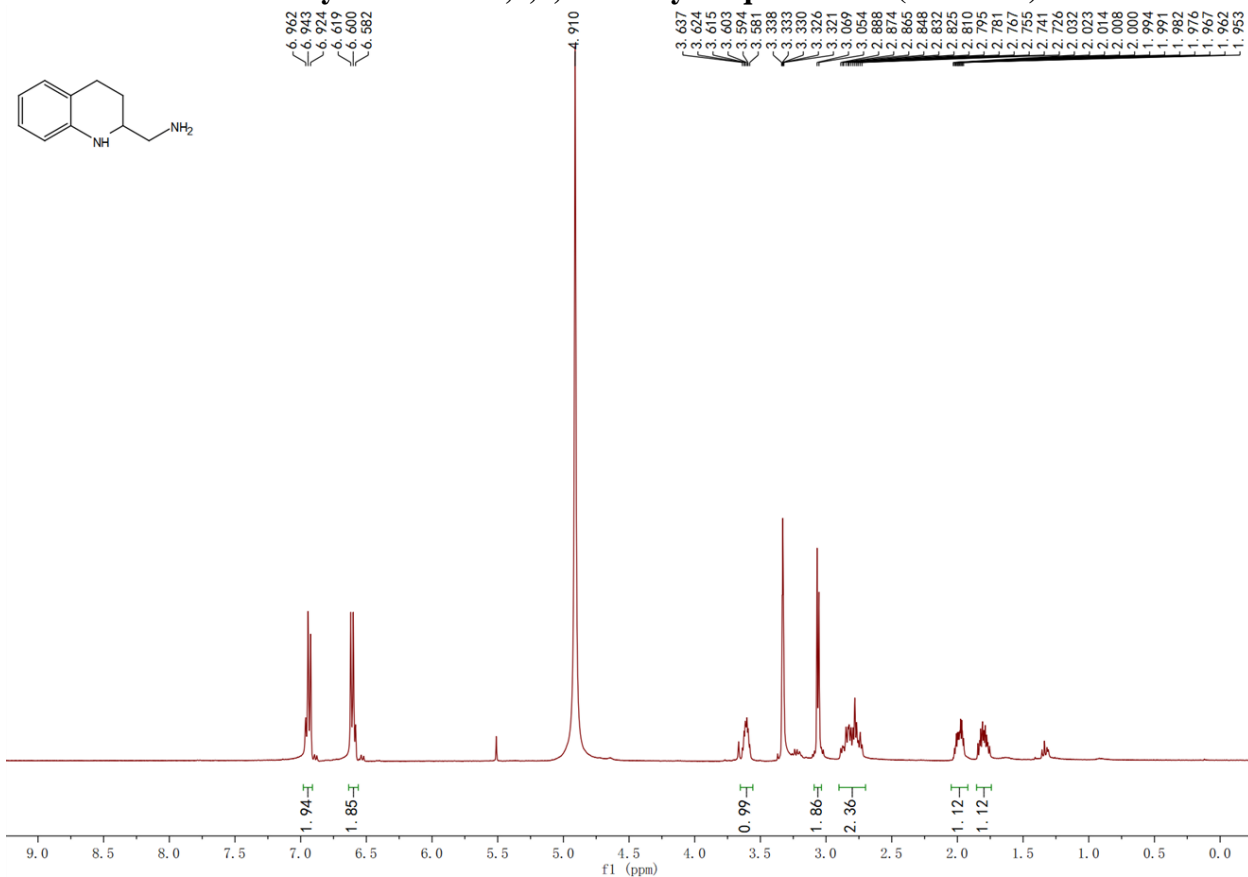

## 3,3a,4,5-tetrahydroimidazo[1,5-a]quinolin-1(2H)-one 7 (<sup>1</sup>H-NMR)

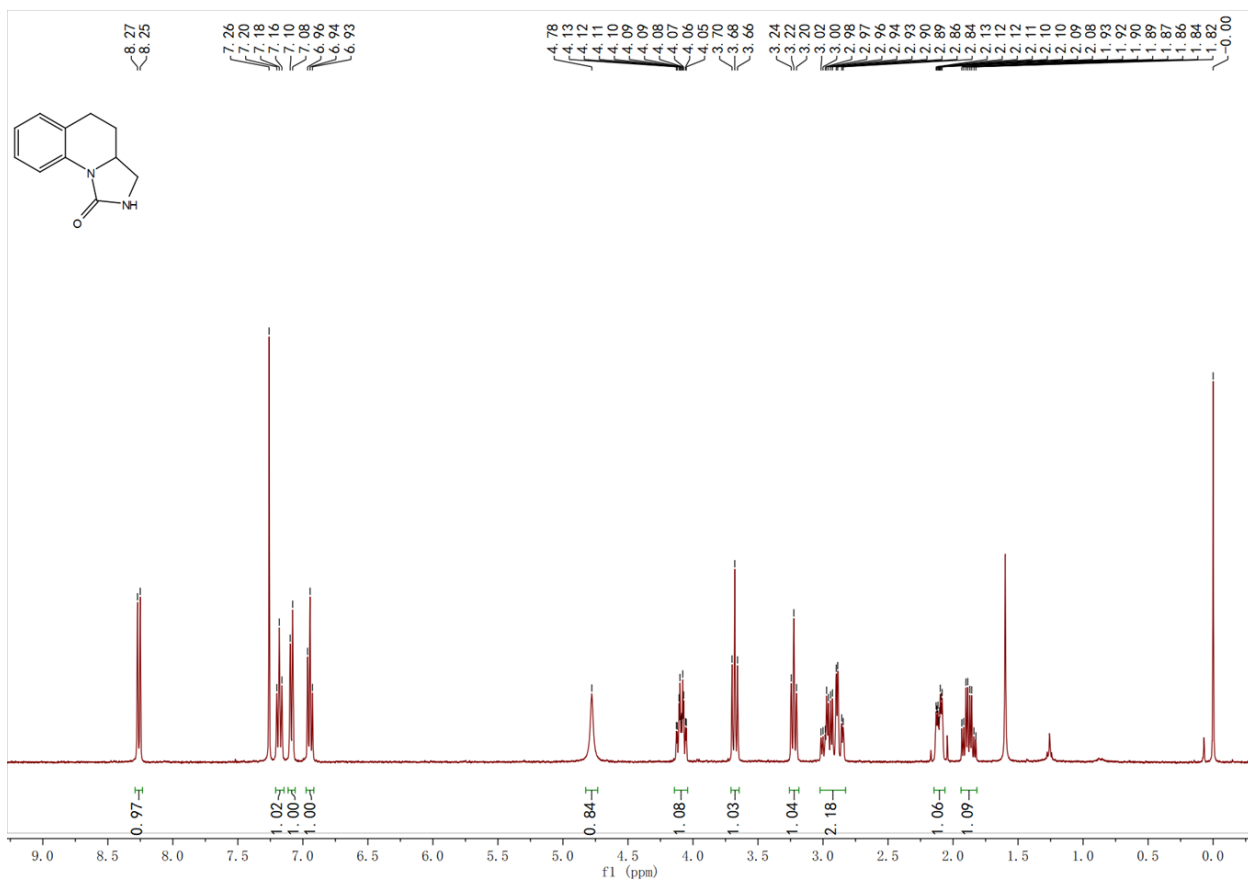

**3,3a,4,5-tetrahydroimidazo[1,5-a]quinolin-1(2H)-one 7 (<sup>13</sup>C-NMR)**

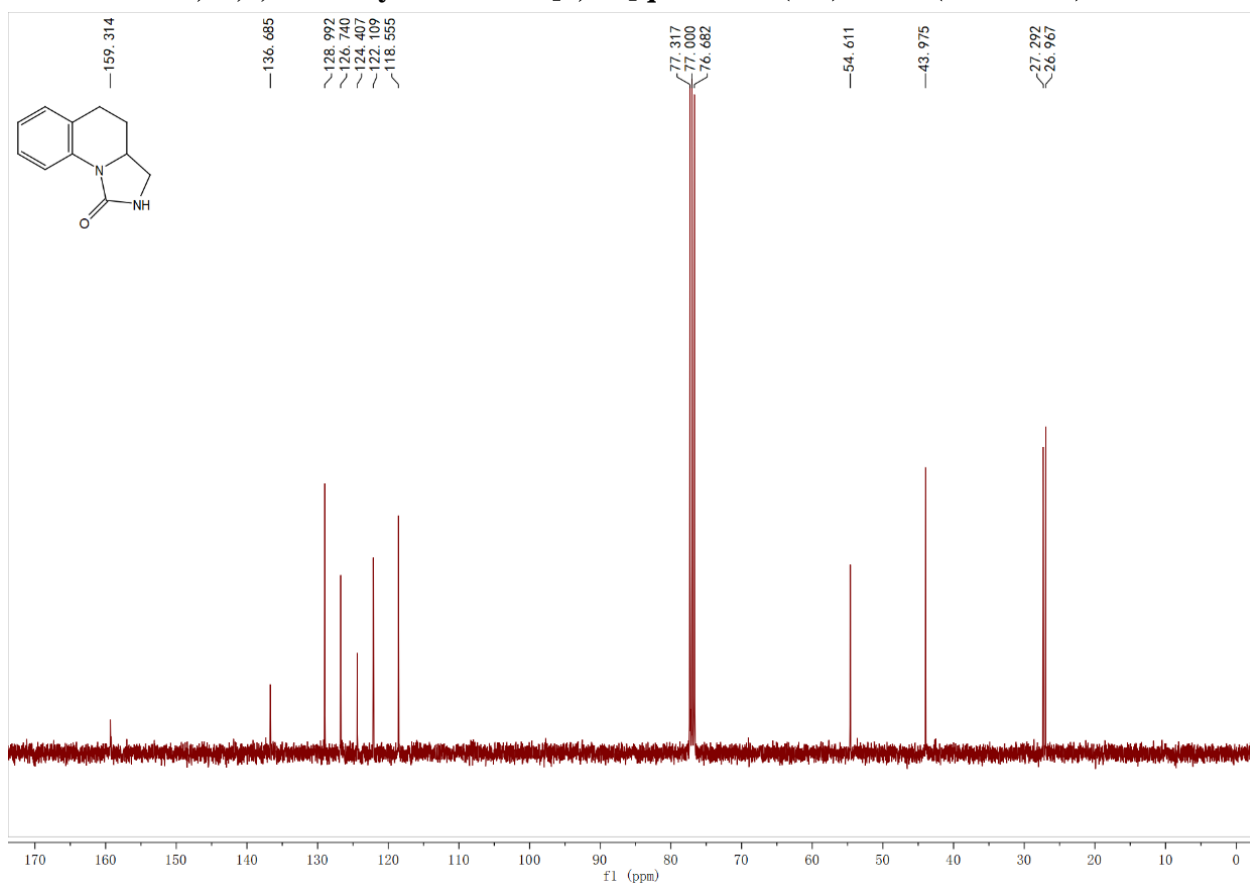

***N*-Benzyl-2-ethynylbenzene-1,2,3,4-tetrahydroquinoline 9aa (<sup>1</sup>H-NMR)**

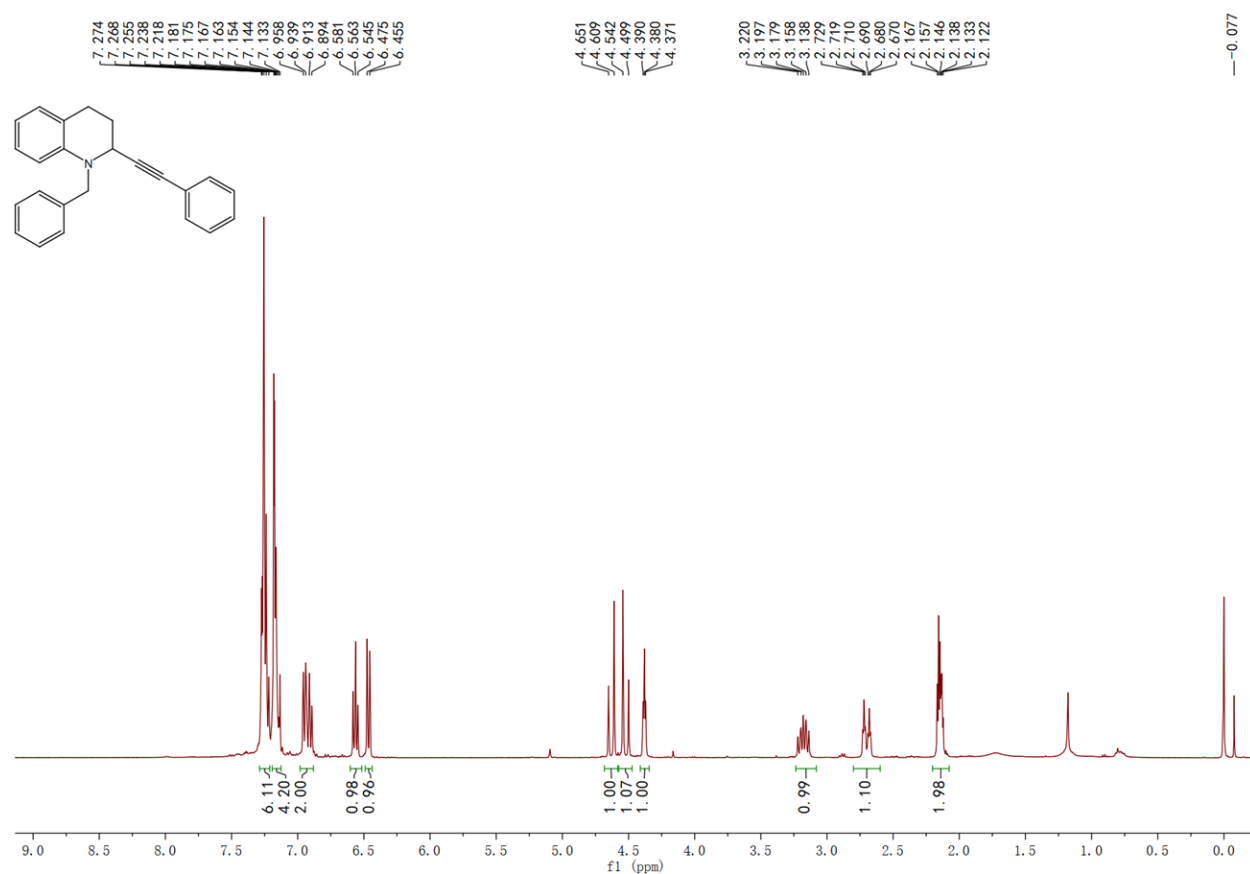

—0.077

***N*-Benzyl-2-ethynylbenzene-1,2,3,4-tetrahydroquinoline 9aa (<sup>13</sup>C-NMR)**

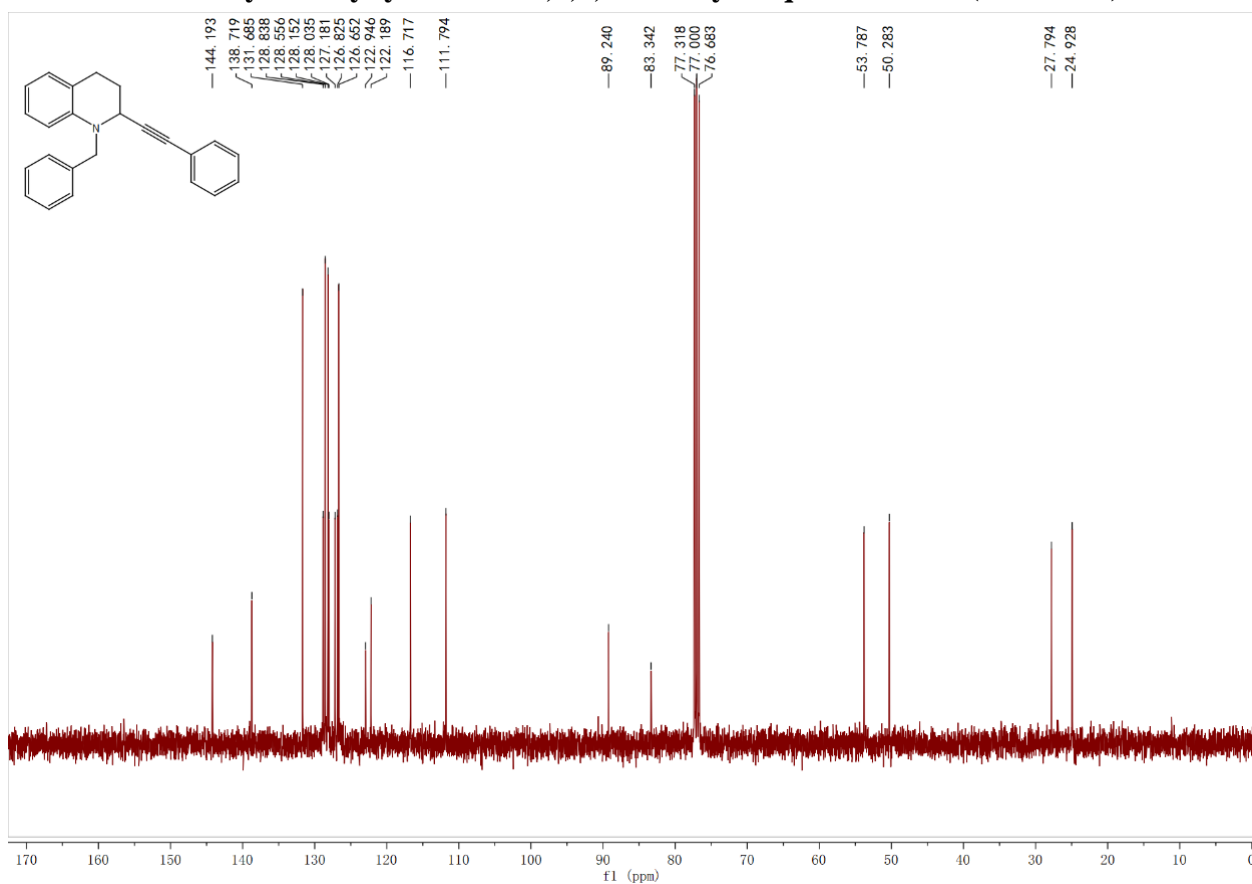

***N*-Phenyl-2-ethynylbenzene-1,2,3,4-tetrahydroquinoline 9ba (<sup>1</sup>H-NMR)**

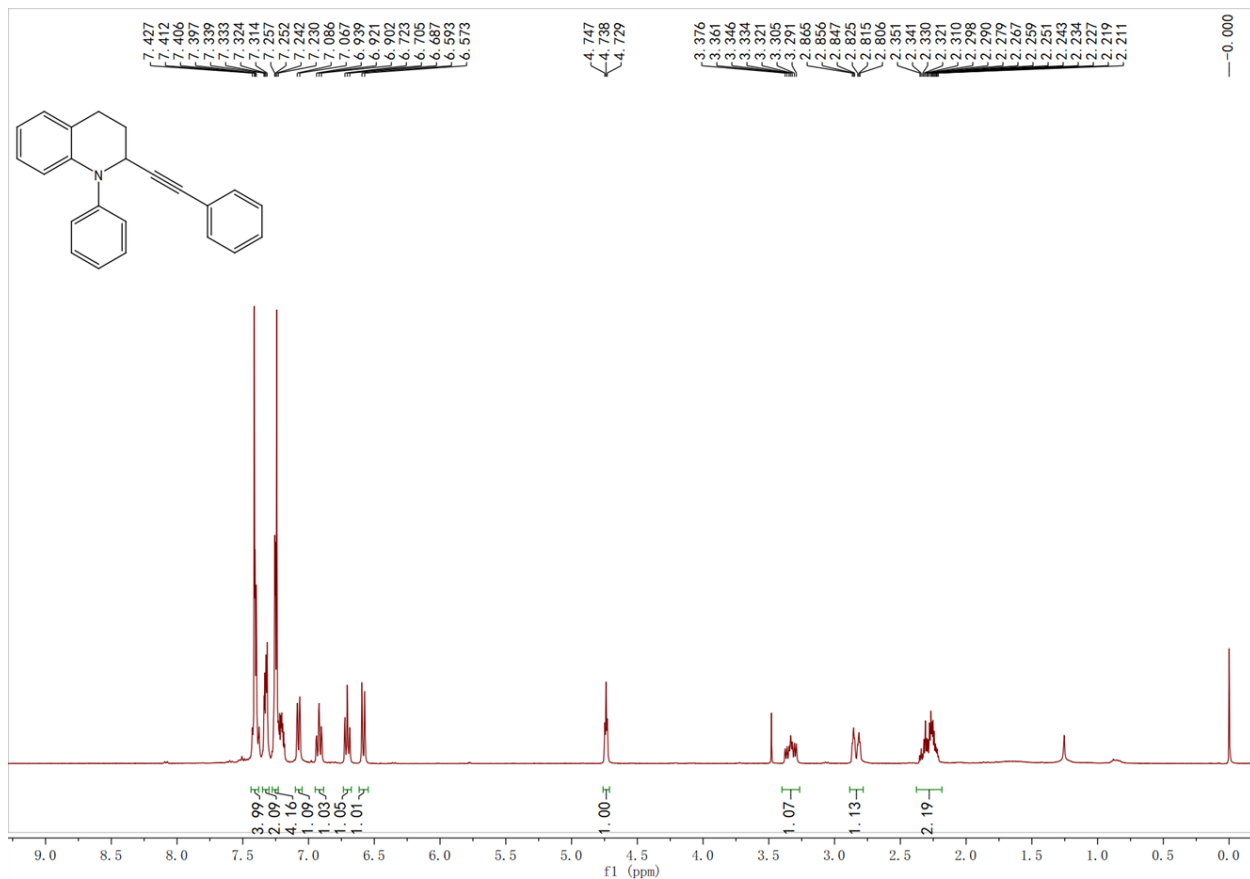

***N*-Phenyl -2-ethynylbenzene-1,2,3,4-tetrahydroquinoline 9ba (<sup>13</sup>C-NMR)**

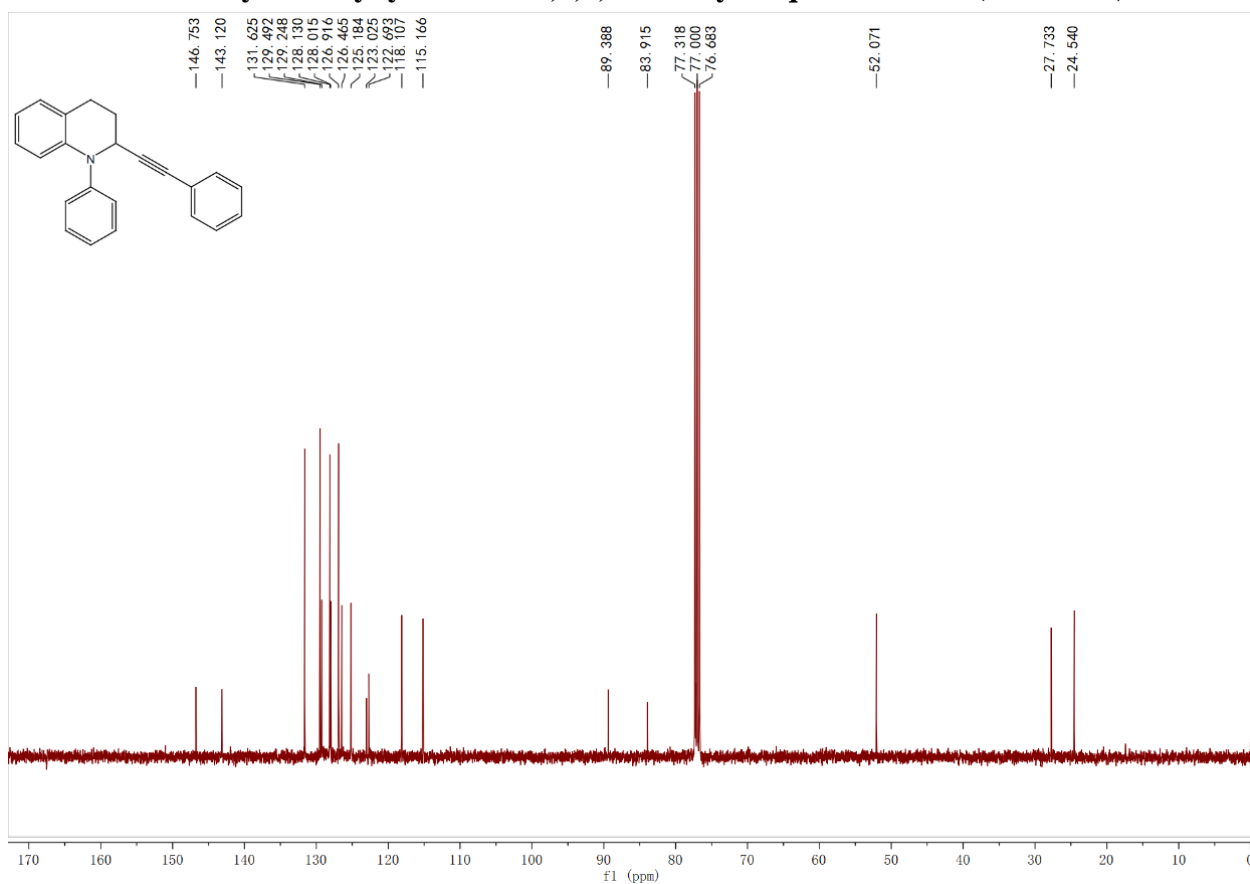

***N*-Allyl-2-ethynylbenzene-1,2,3,4-tetrahydroquinoline 9ca (<sup>1</sup>H-NMR)**

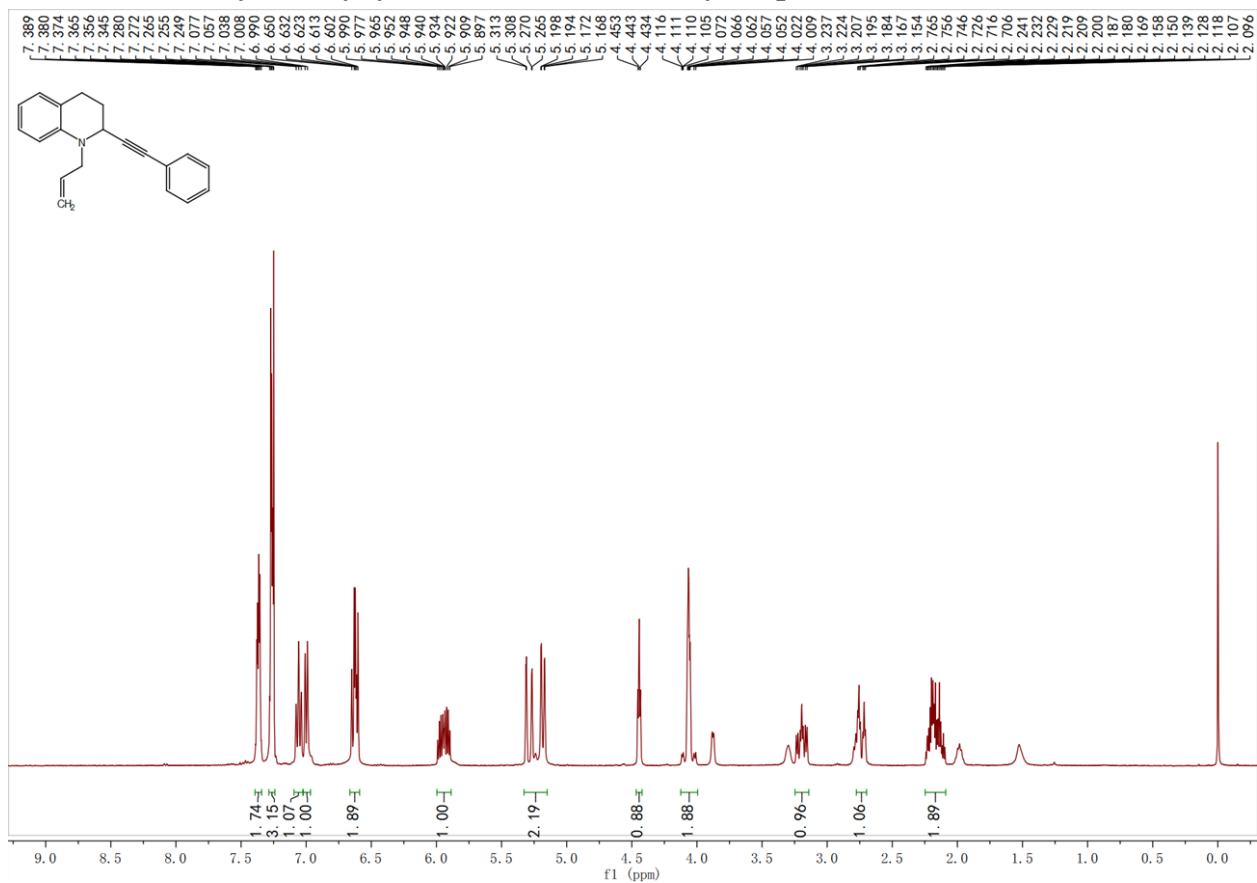

***N*-Allyl-2-ethynylbenzene-1,2,3,4-tetrahydroquinoline 9ca (<sup>13</sup>C-NMR)**

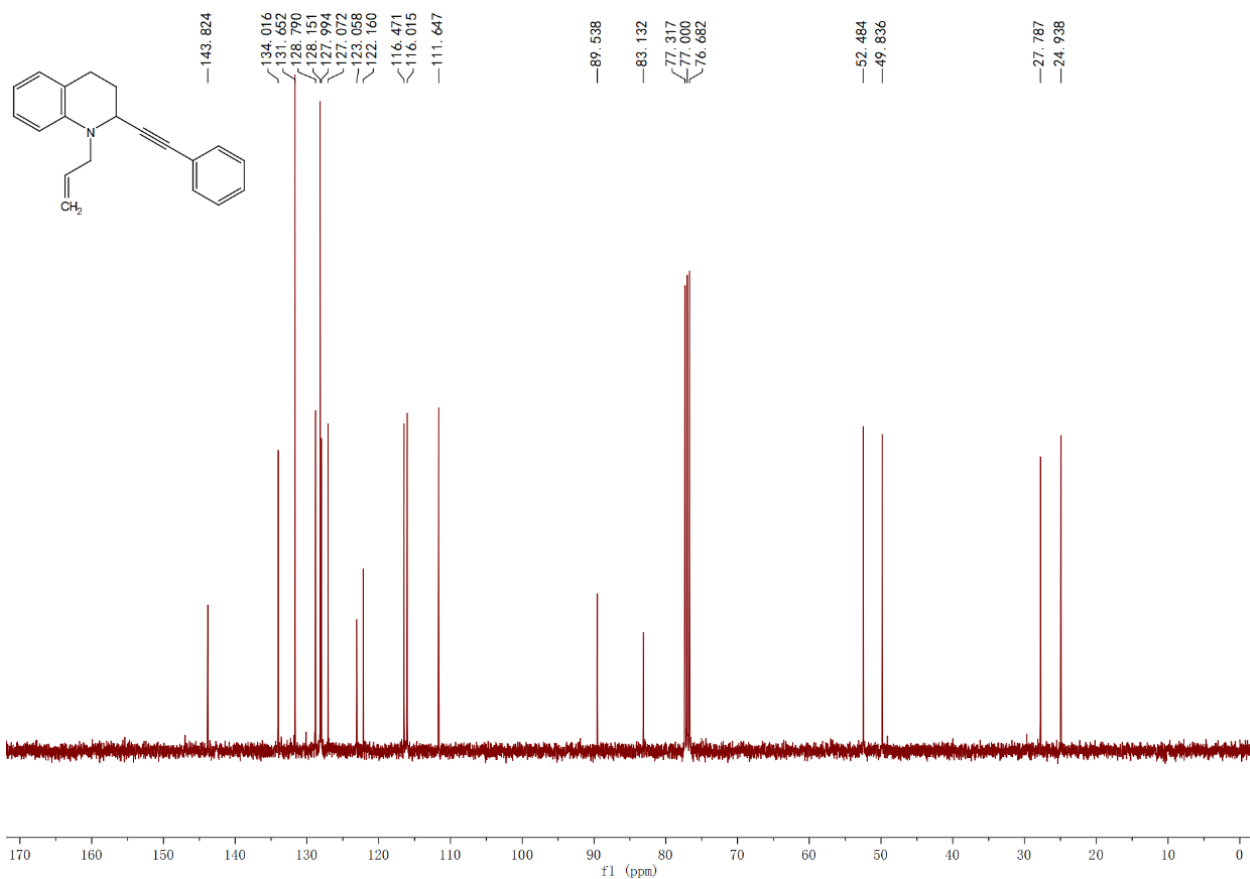

***N*-Methyl-2-ethynylbenzene-1,2,3,4-tetrahydroquinoline 9da (<sup>1</sup>H-NMR)**

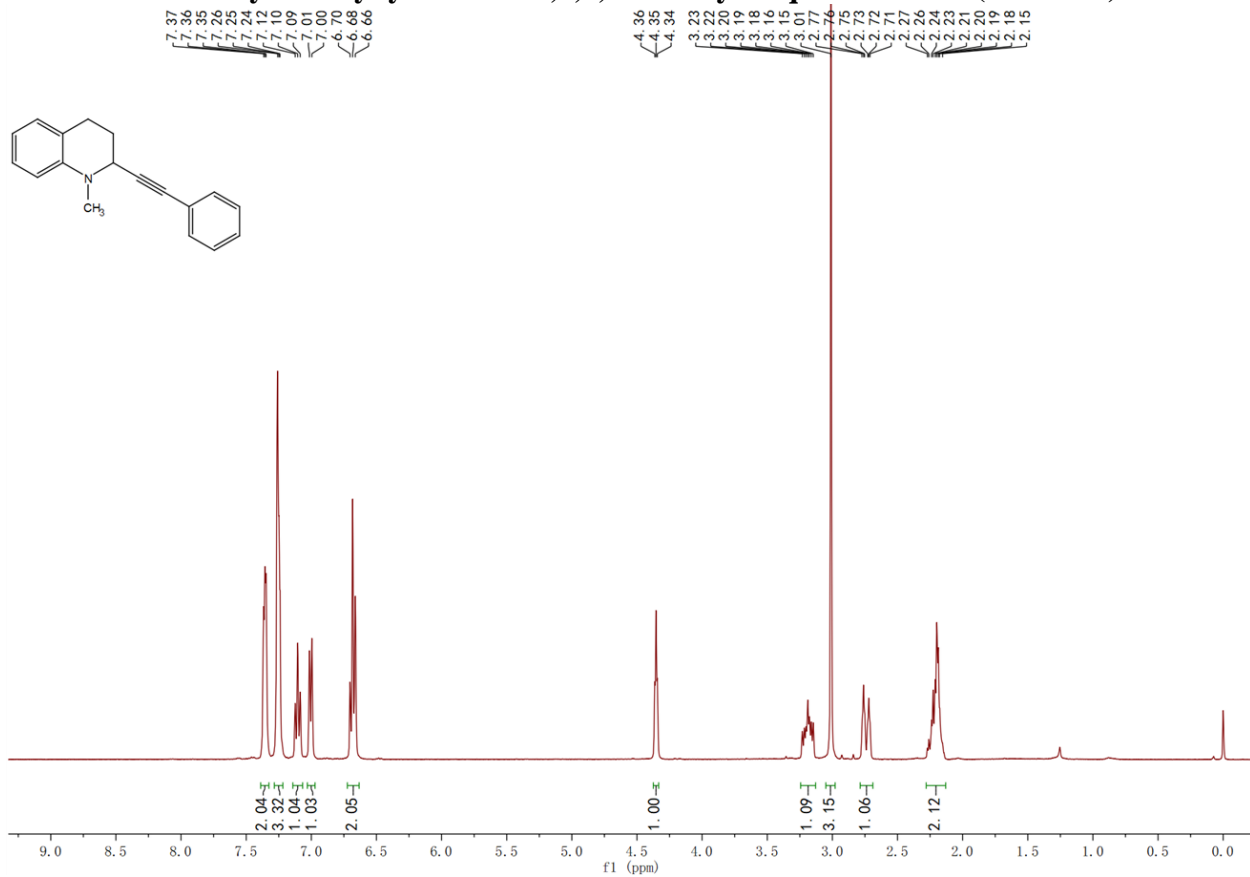

***N*-Methy-2-ethynylbenzene-1,2,3,4-tetrahydroquinoline 9da (<sup>13</sup>C-NMR)**

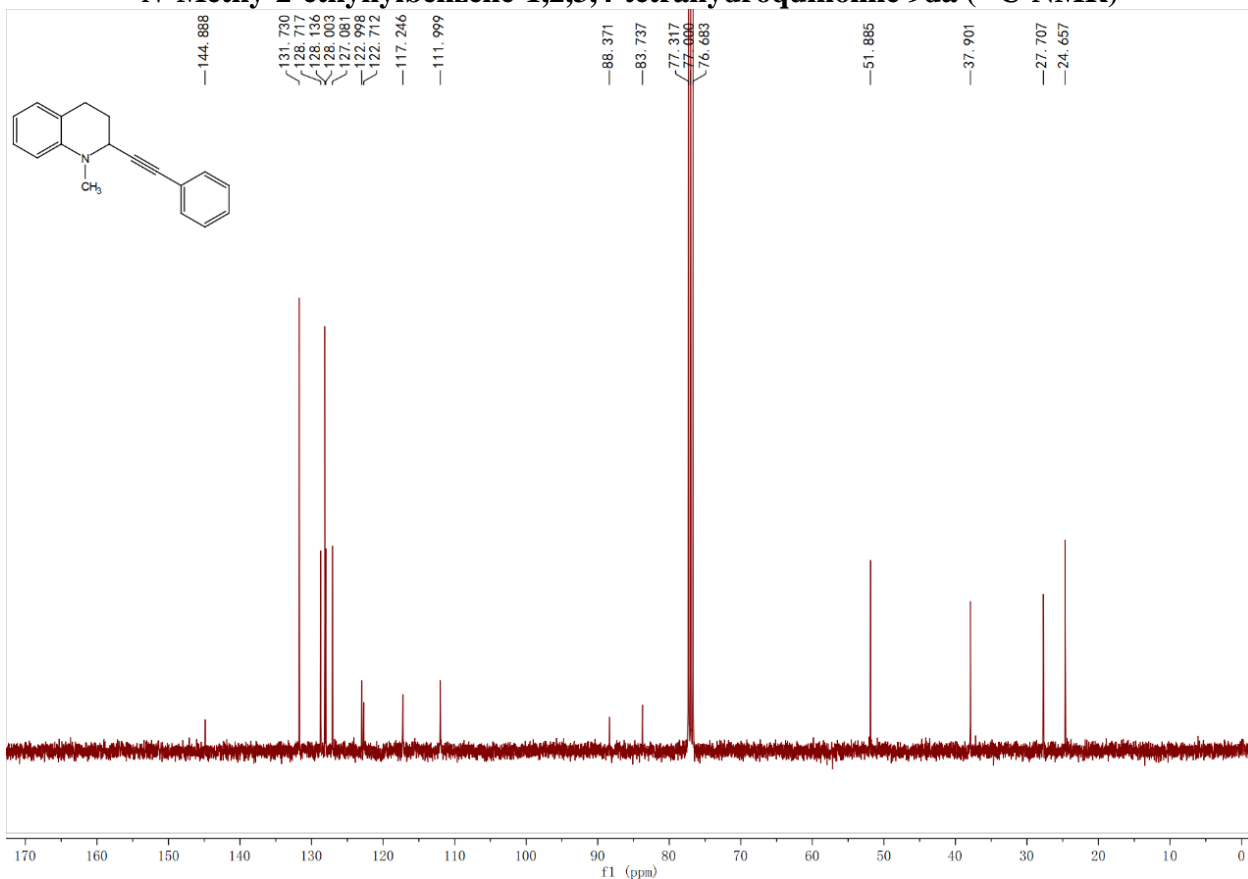

***N*-Benzyl-2-ethynylbenzene-6-methoxy-1,2,3,4-tetrahydroquinoline 9ga (<sup>1</sup>H-NMR)**

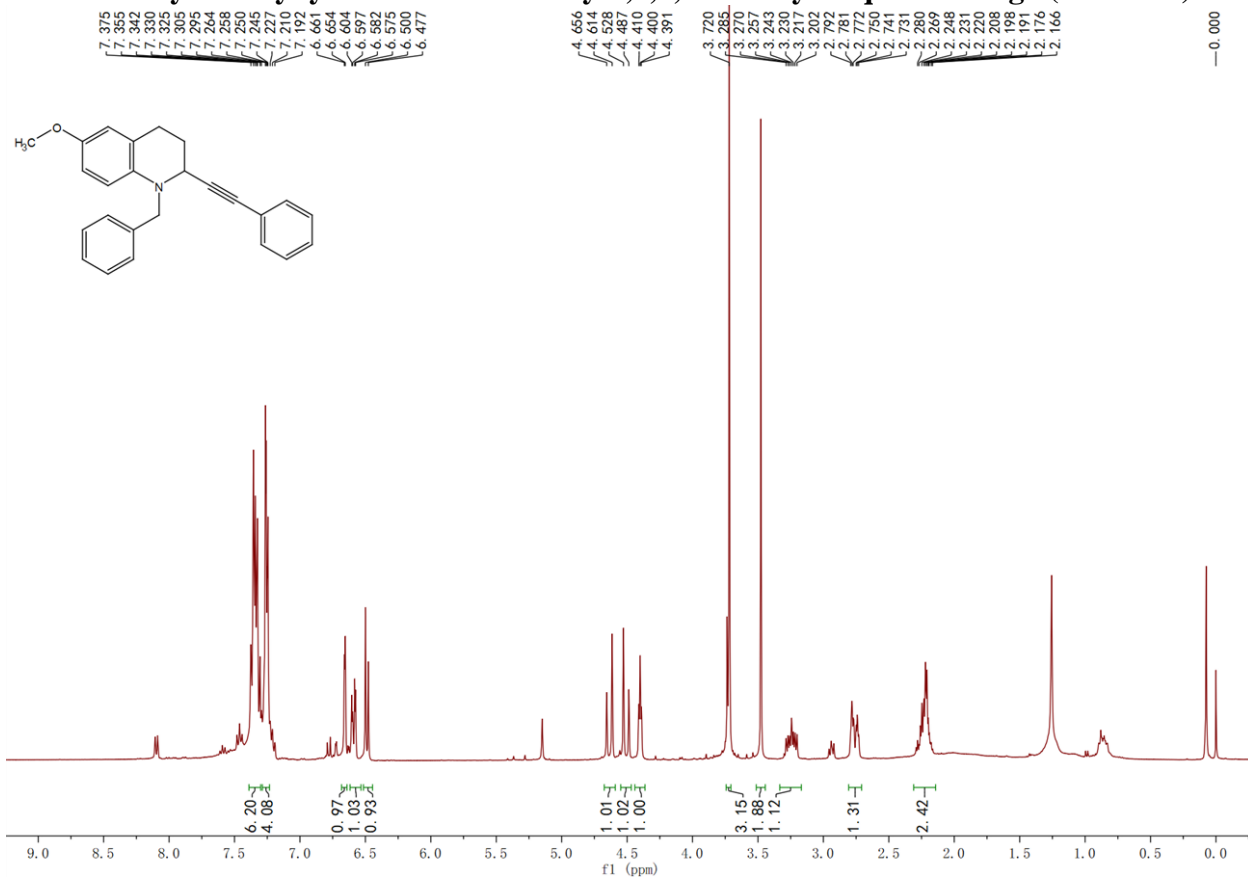

***N*-Benzyl-2-ethynylbenzene-6-methoxy-1,2,3,4-tetrahydroquinoline 9ga (<sup>13</sup>C-NMR)**

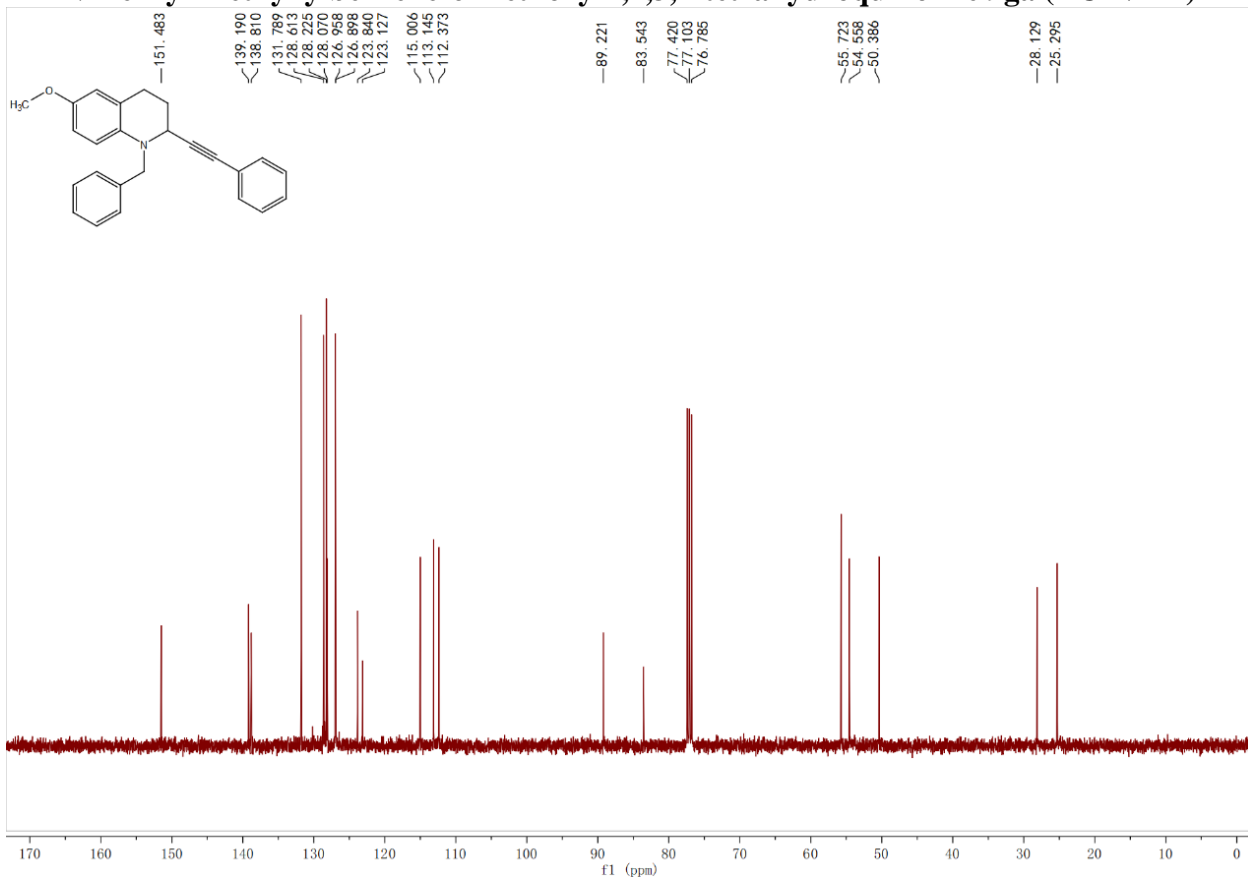

***N*-Benzyl-2-ethynylbenzene-6-methyl-1,2,3,4-tetrahydroquinoline 9ha (<sup>1</sup>H-NMR)**

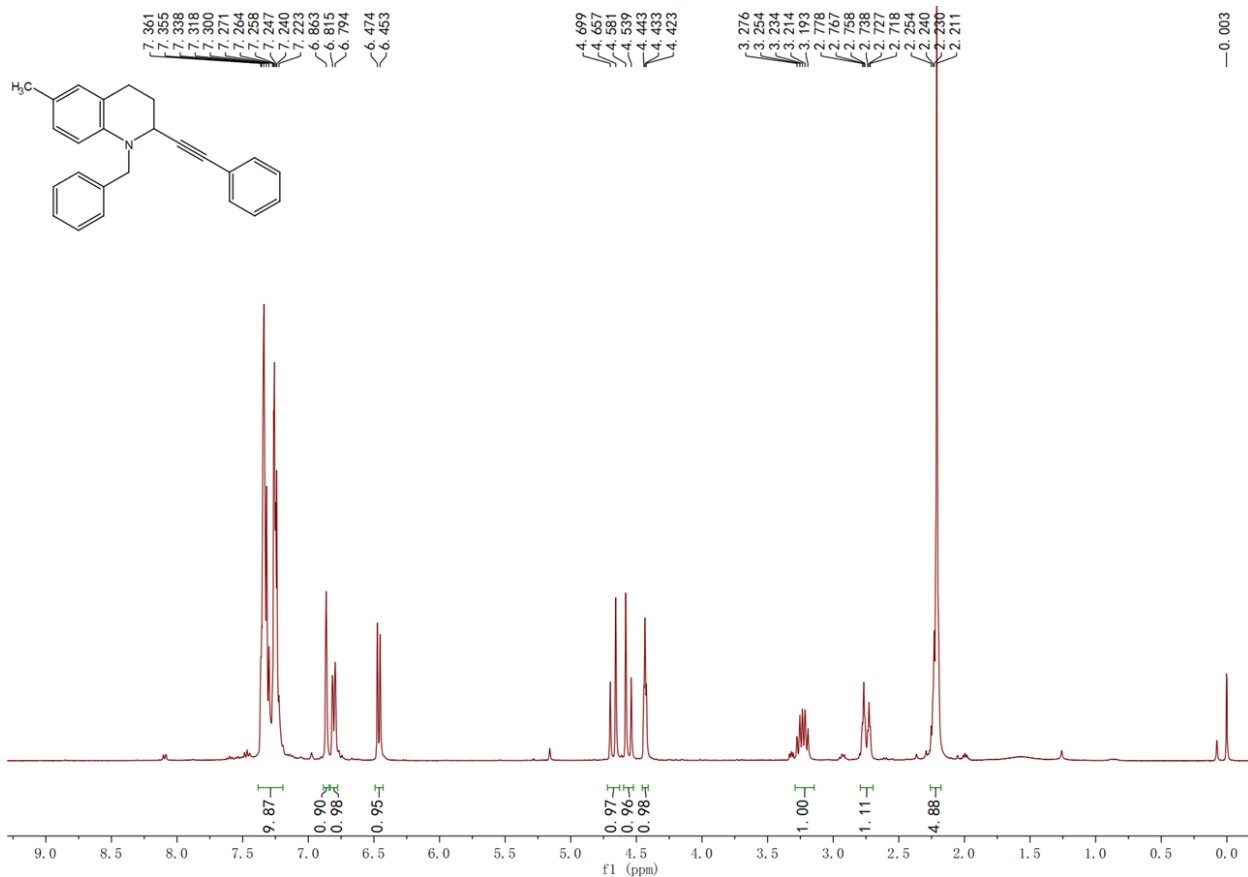

### *N*-Benzyl-2-ethynylbenzene-6-methyl-1,2,3,4-tetrahydroquinoline 9ha (<sup>13</sup>C-NMR)

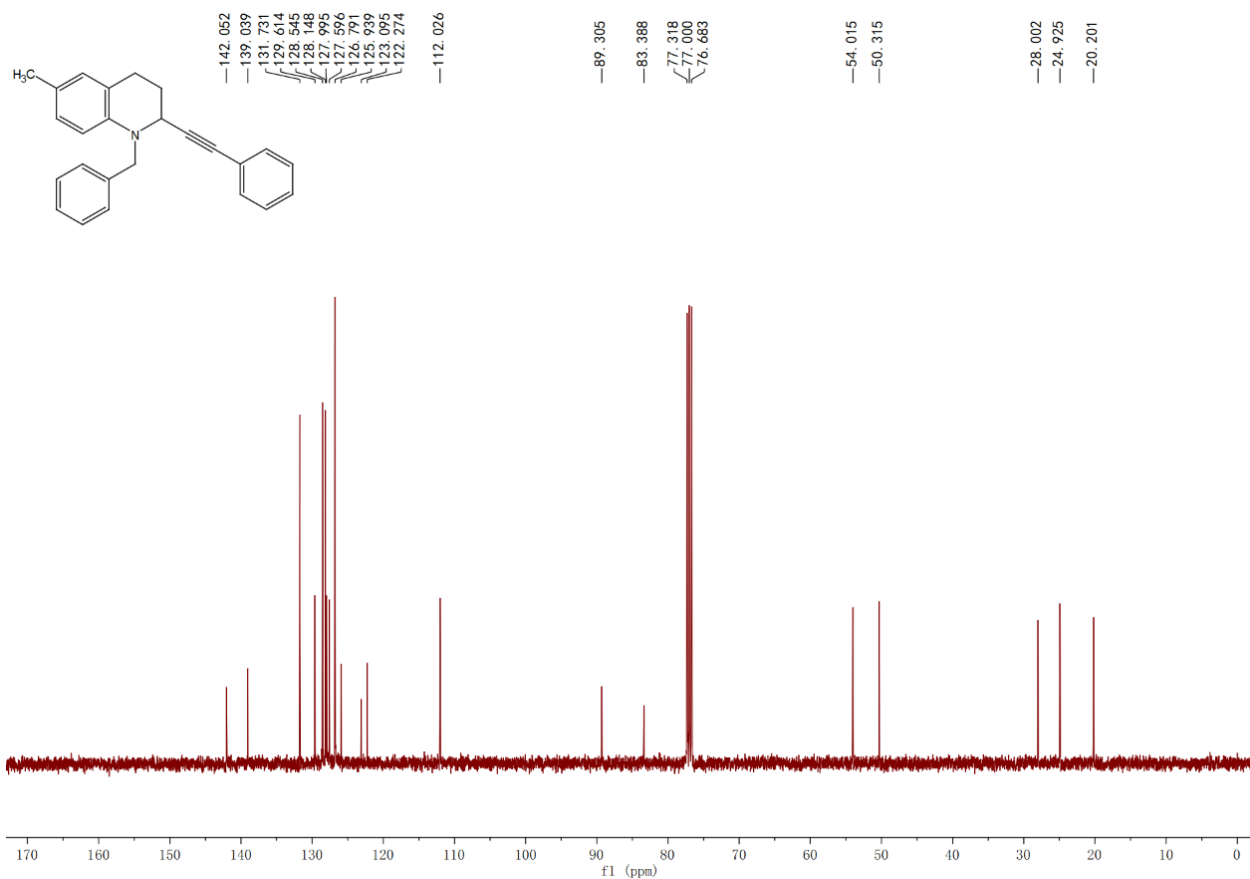

### *N*-Benzyl-2-ethynylbenzene-6-fluoro-1,2,3,4-tetrahydroquinoline 9ia (<sup>1</sup>H-NMR)

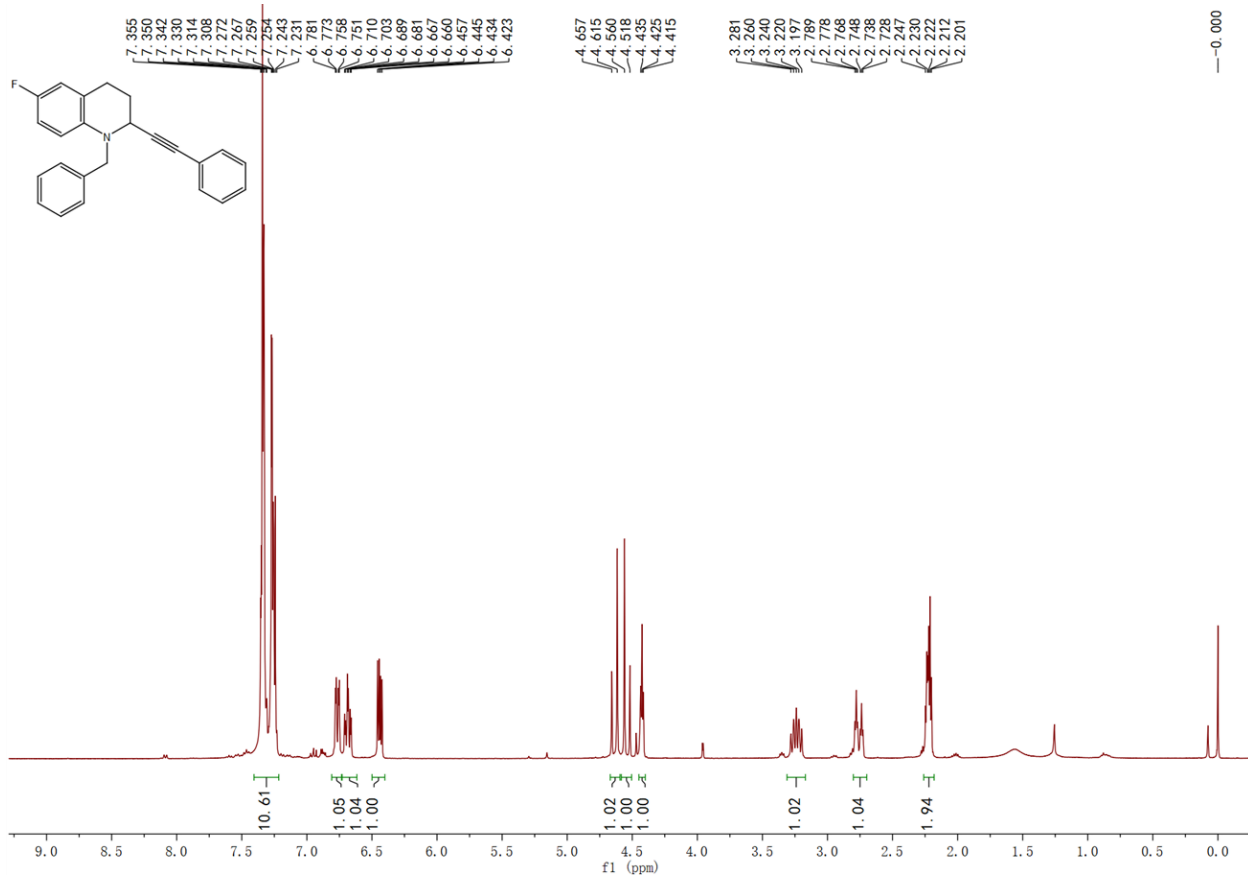

### *N*-Benzyl-2-ethynylbenzene-6-fluoro-1,2,3,4-tetrahydroquinoline 9ia (<sup>13</sup>C-NMR)



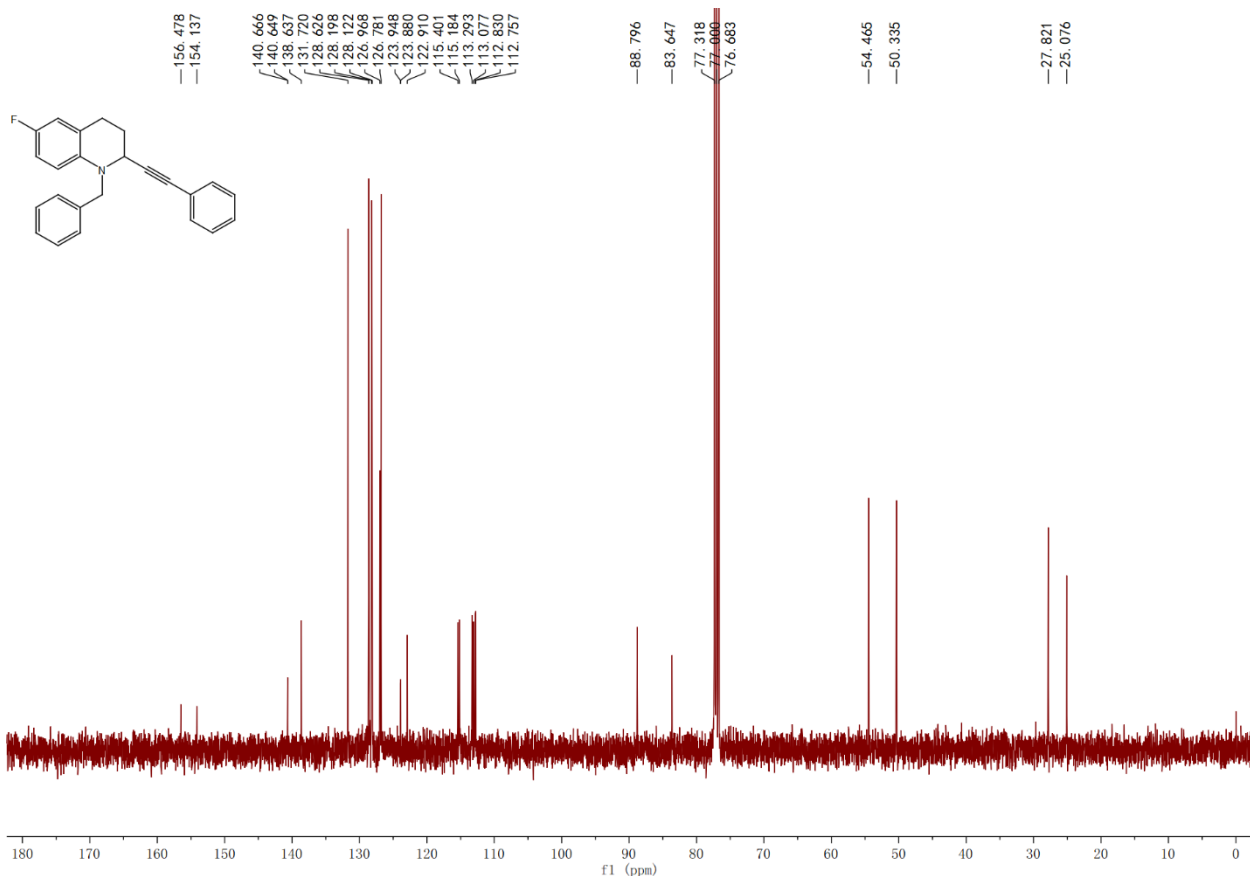

***N*-Benzyl-2-ethynylbenzene-6-chloro-1,2,3,4-tetrahydroquinoline 9ja (<sup>1</sup>H-NMR)**

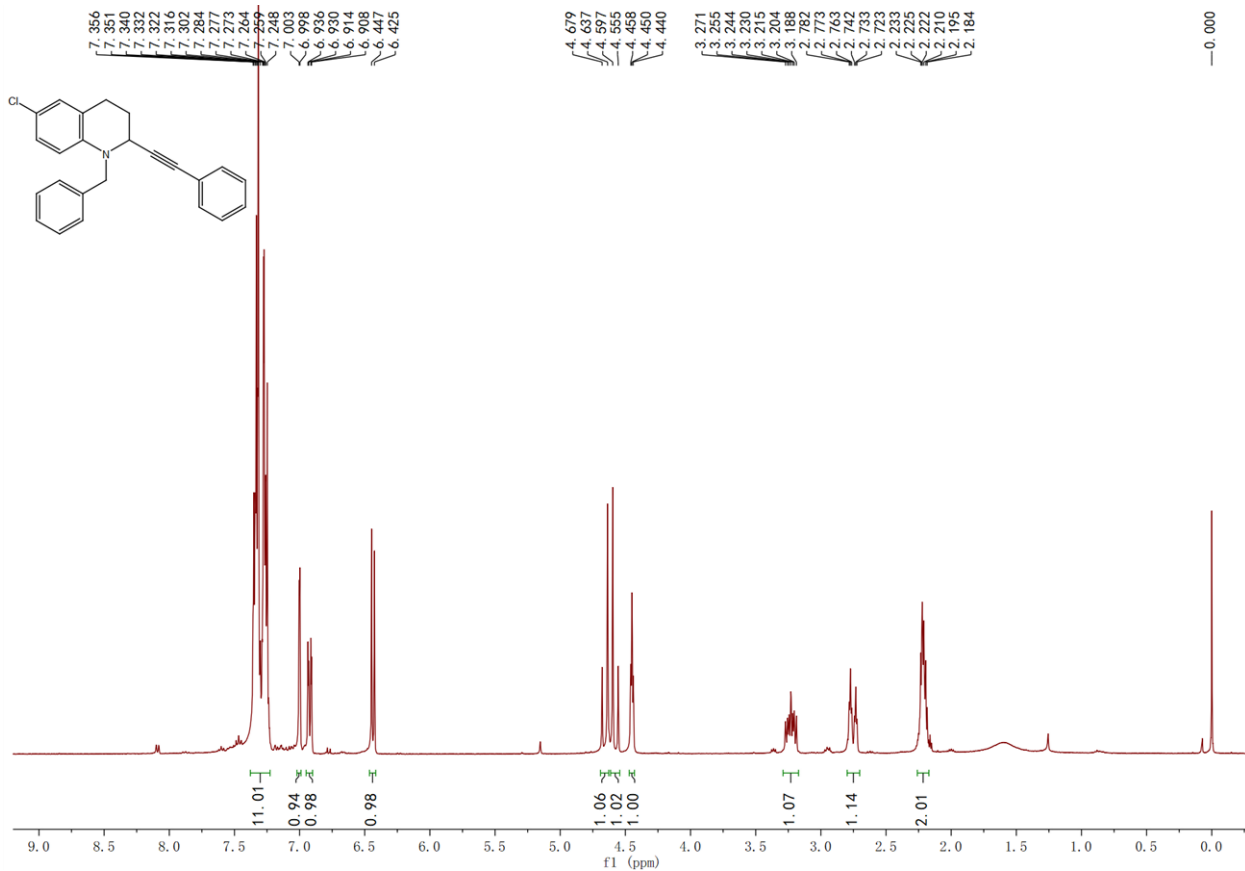

***N*-Benzyl-2-ethynylbenzene-6-chloro-1,2,3,4-tetrahydroquinoline 9ja (<sup>13</sup>C-NMR)**

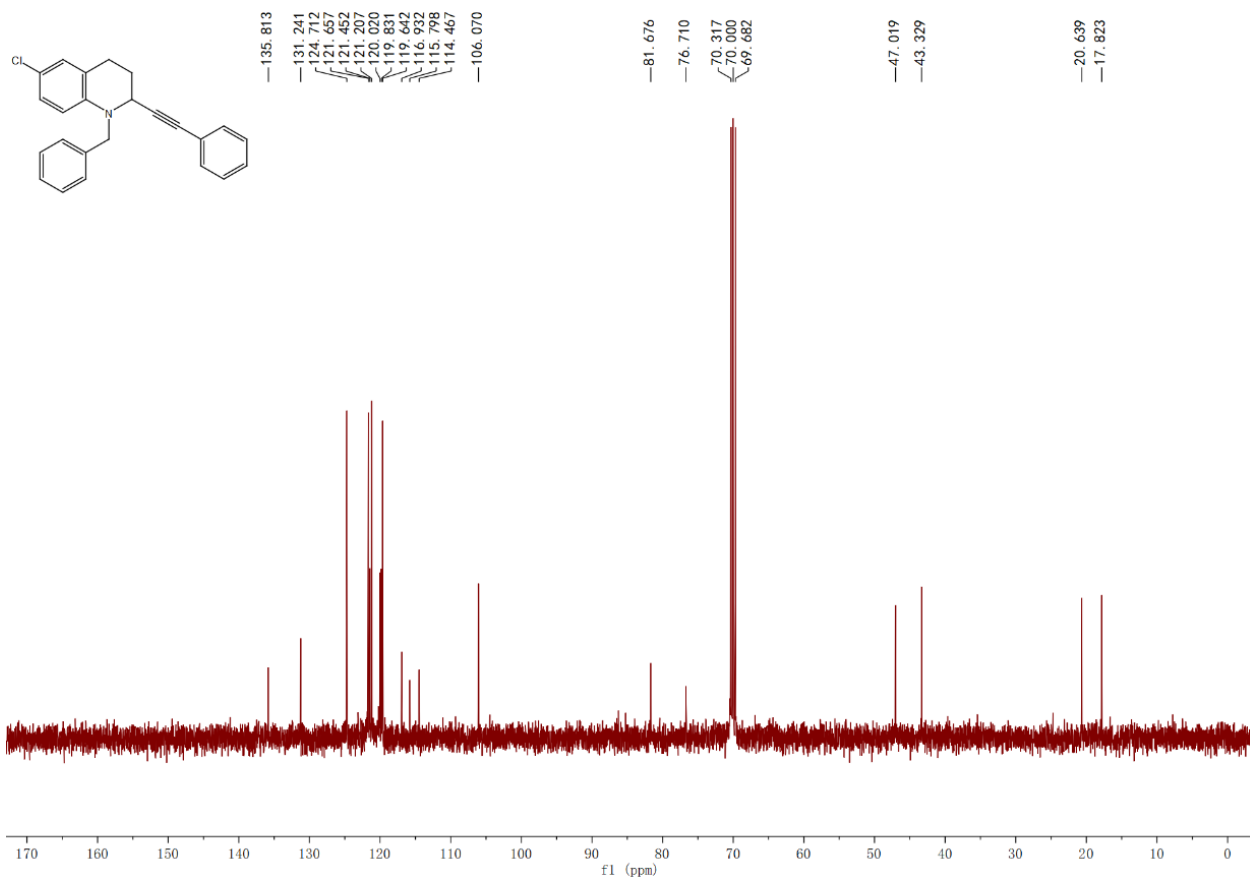

***N*-Benzyl-2-ethynylbenzene-4-phenyl-1,2,3,4-tetrahydroquinoline 9ka (<sup>1</sup>H-NMR)**

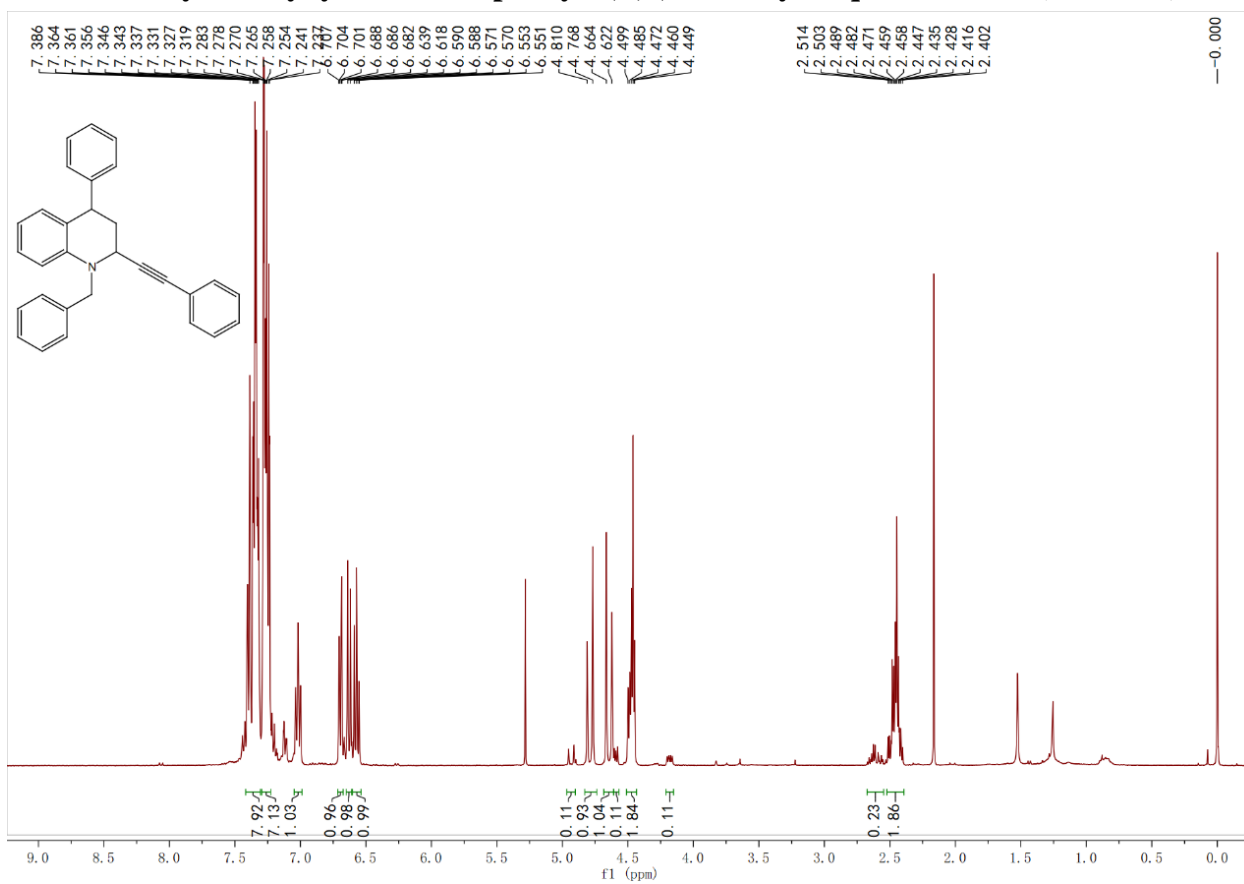

***N*-Benzyl-2-ethynylbenzene-4-phenyl-1,2,3,4-tetrahydroquinoline 9ka (<sup>13</sup>C-NMR)**

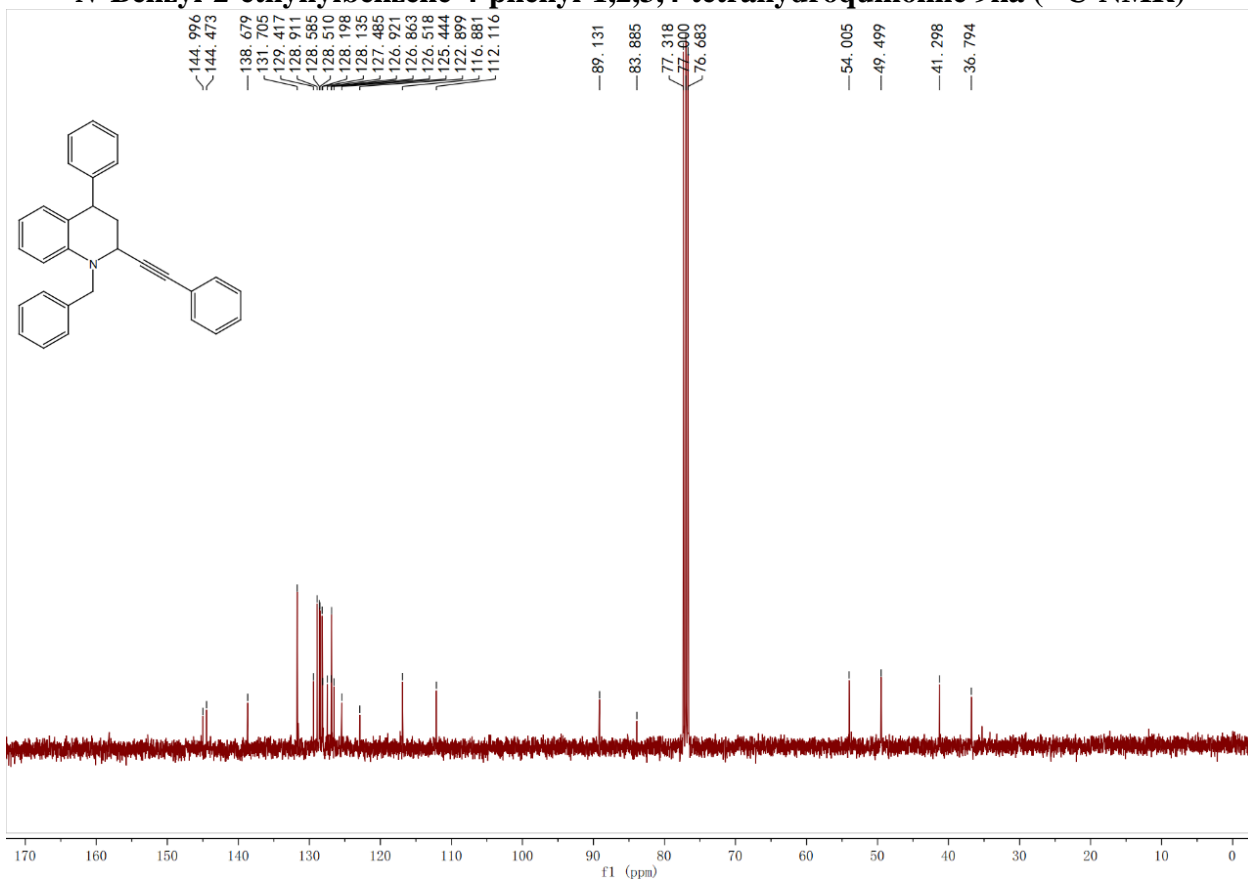

***N*-Benzyl-2-ethynylbenzene-4-*n*-butyl-1,2,3,4-tetrahydroquinoline 9la (<sup>1</sup>H-NMR)**

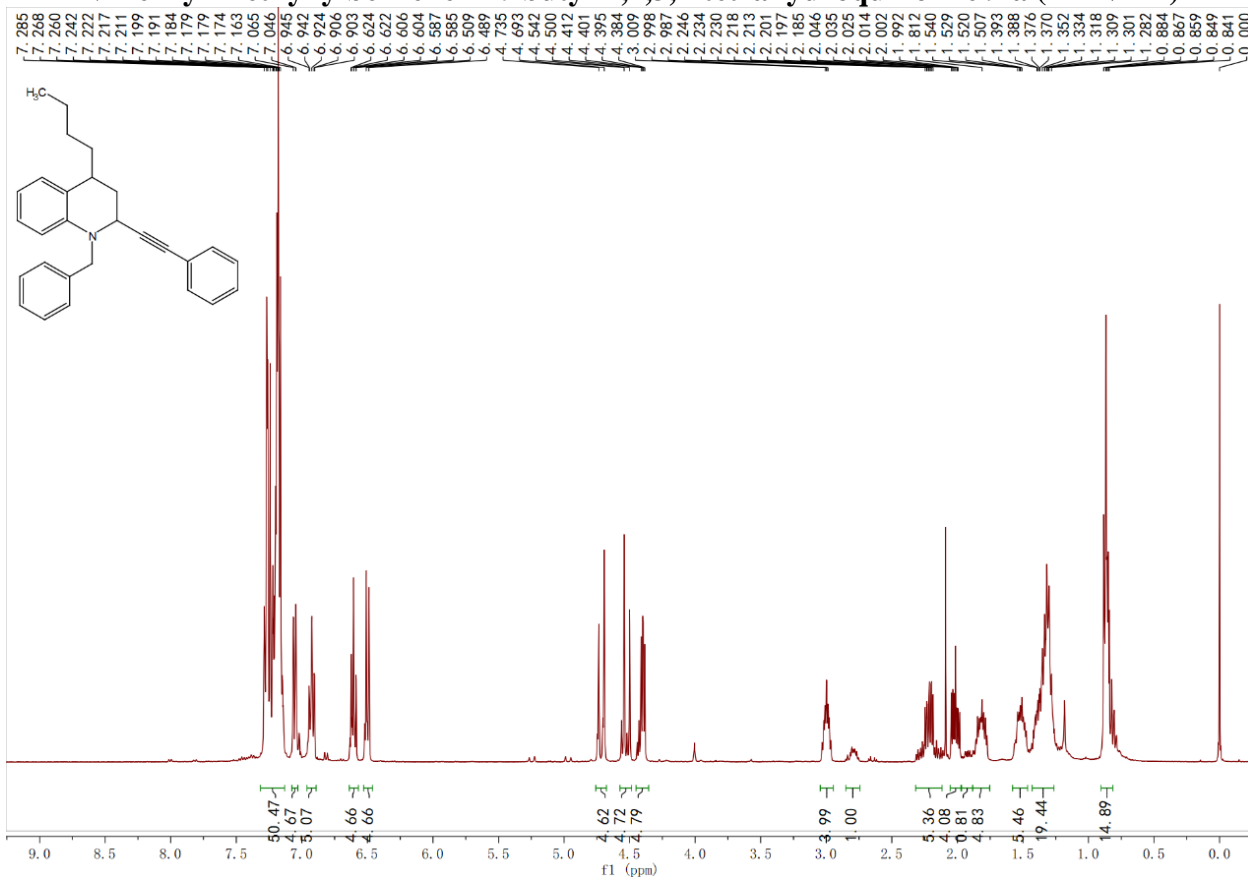

***N*-Benzyl-2-ethynylbenzene-4-*n*-butyl-1,2,3,4-tetrahydroquinoline 9la (<sup>13</sup>C-NMR)**

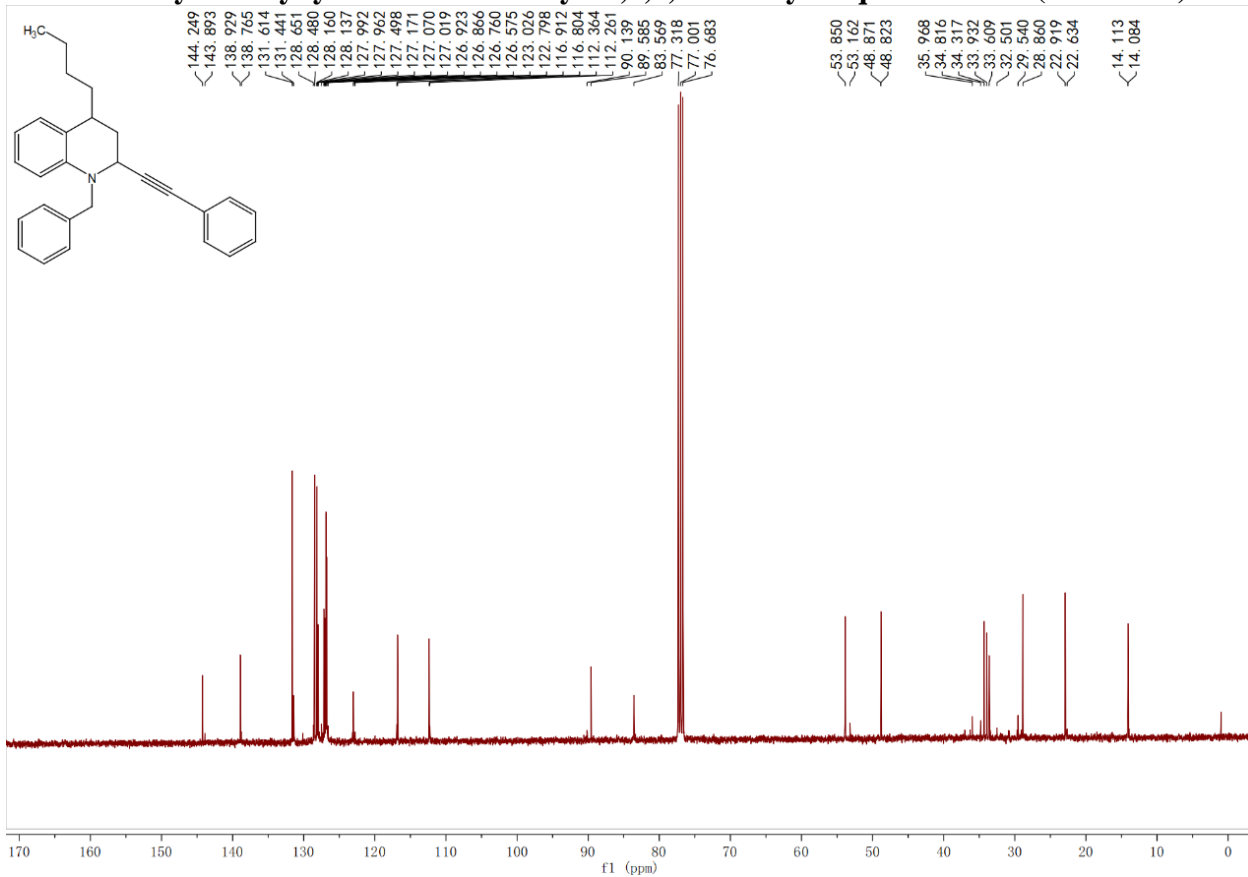

***N*-Benzyl-2-ethynylbenzene-4-methyl-1,2,3,4-tetrahydroquinoline 9ma (<sup>1</sup>H-NMR)**

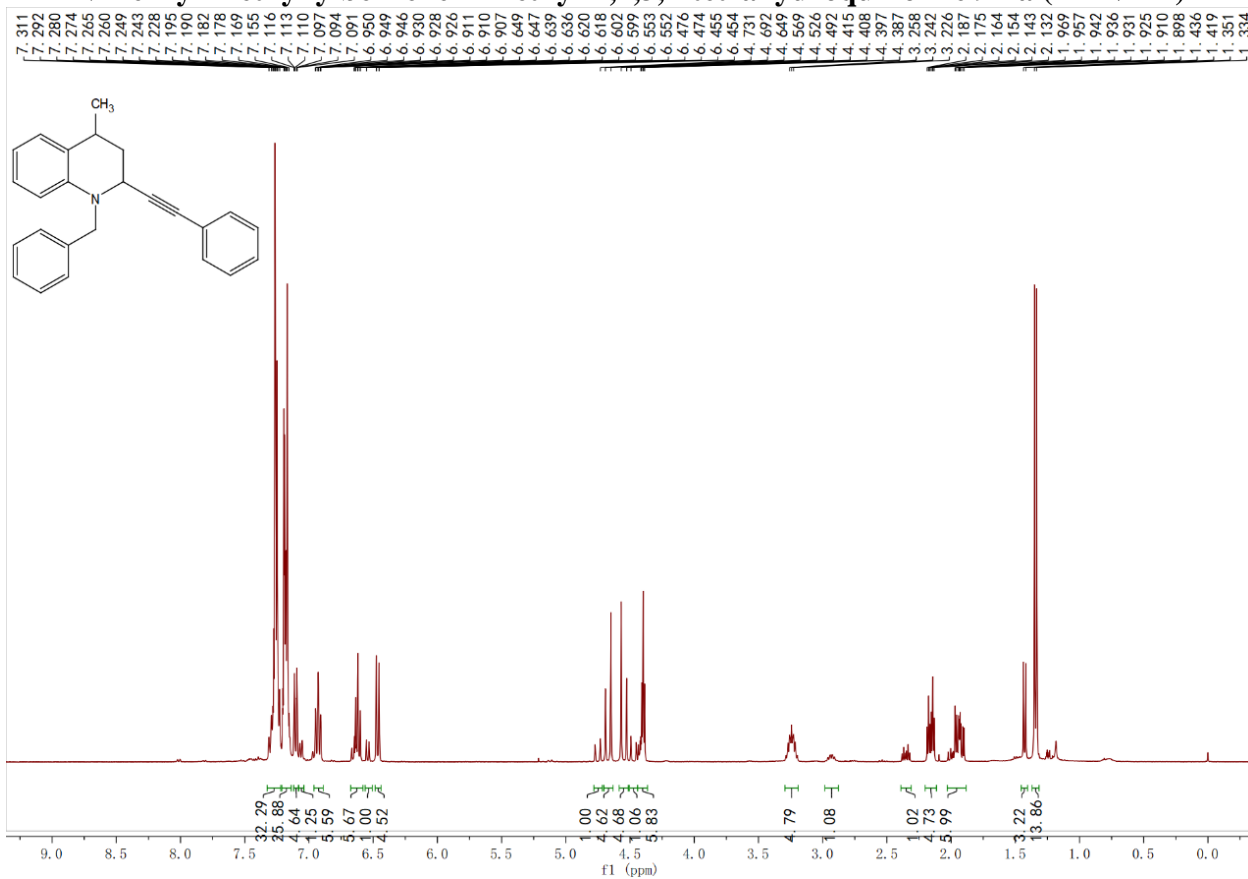

***N*-Benzyl-2-ethynylbenzene-4-methyl-1,2,3,4-tetrahydroquinoline 9ma (<sup>13</sup>C-NMR)**

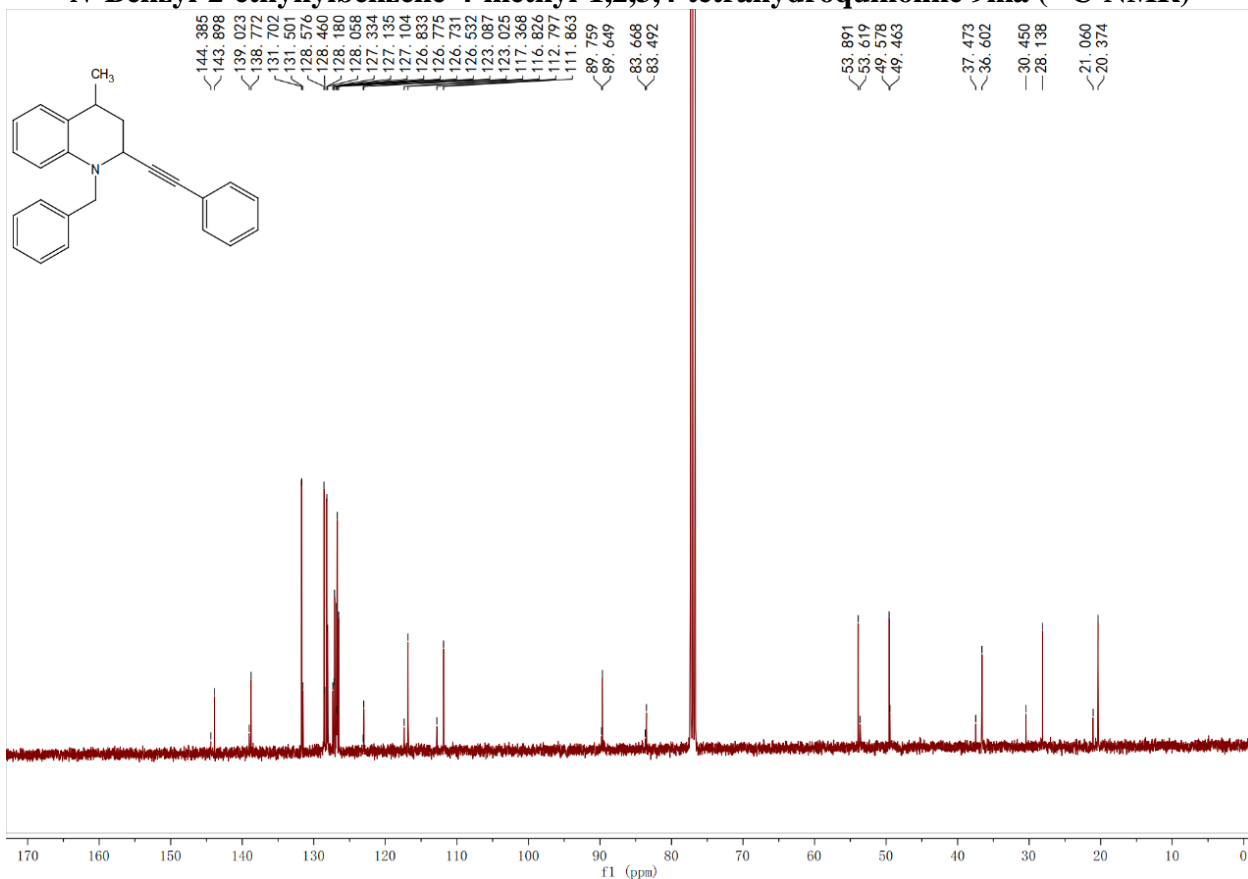

***N*-Benzyl-2-(4-Methoxyphenylethynyl)-1,2,3,4-tetrahydroquinoline 9ab (<sup>1</sup>H-NMR)**

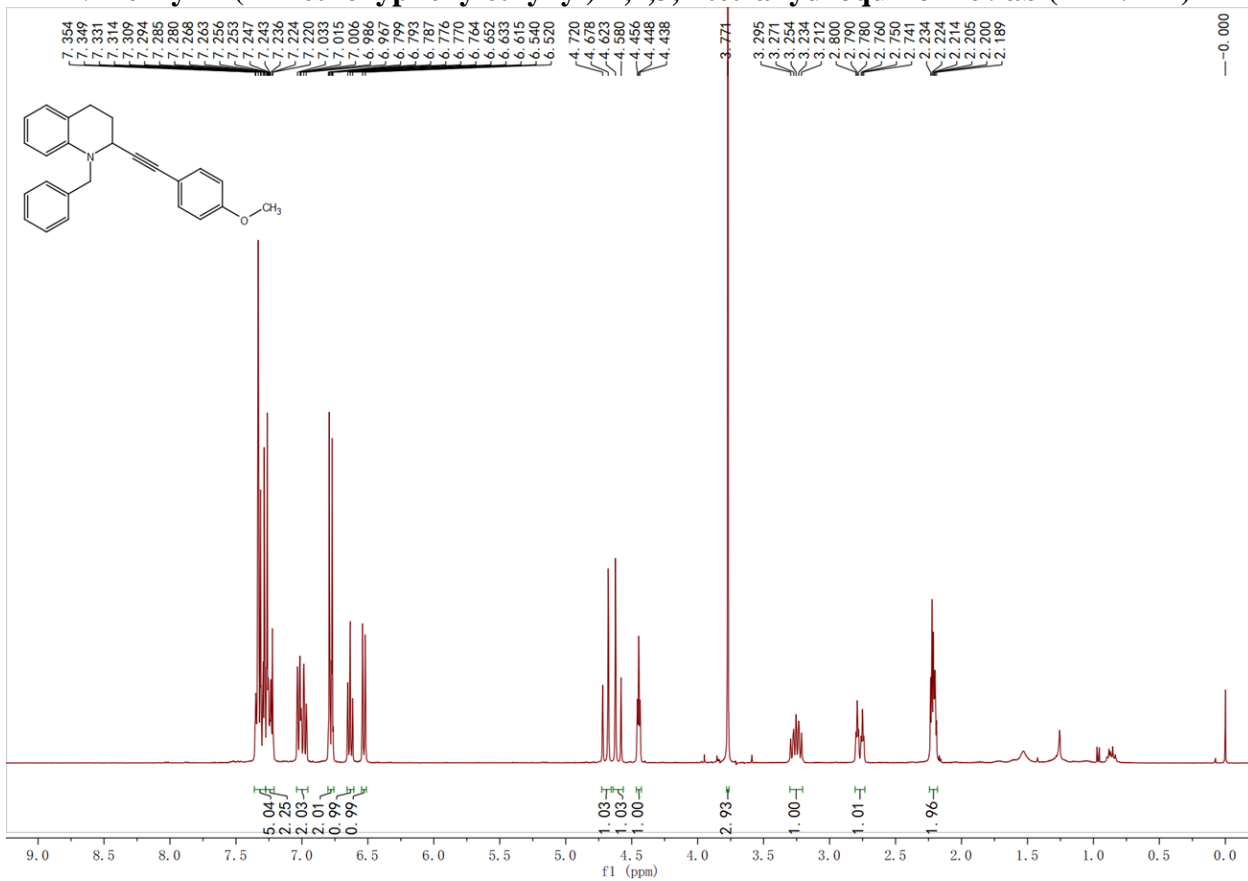

***N*-Benzyl-2-(4-Methoxyphenylethynyl)-1,2,3,4-tetrahydroquinoline 9ab (<sup>13</sup>C-NMR)**

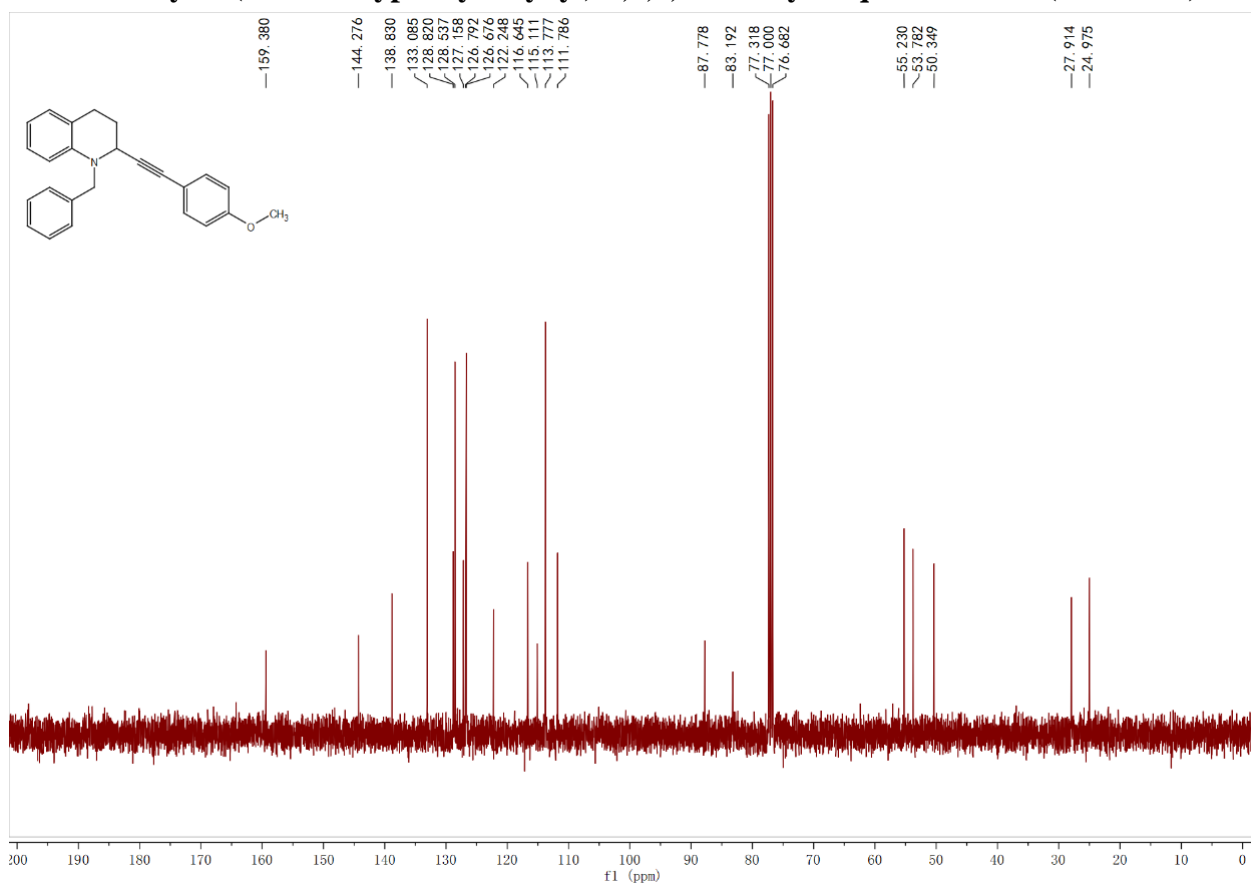

***N*-Benzyl-2-(4-methylphenylethynyl)-1,2,3,4-tetrahydroquinoline 9ac (<sup>1</sup>H-NMR)**

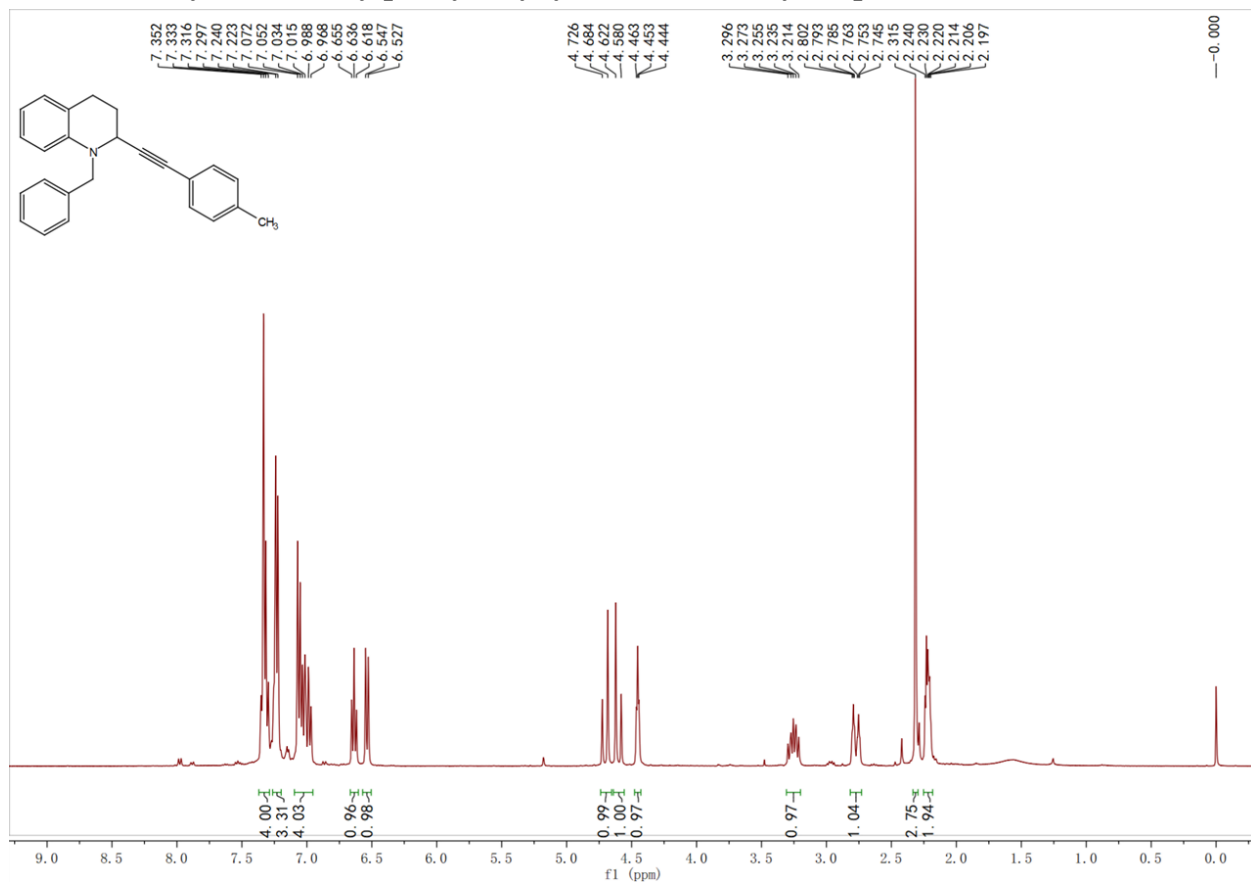

***N*-Benzyl-2-(4-methylphenylethynyl)1,2,3,4-tetrahydroquinoline 9ac (<sup>13</sup>C-NMR)**

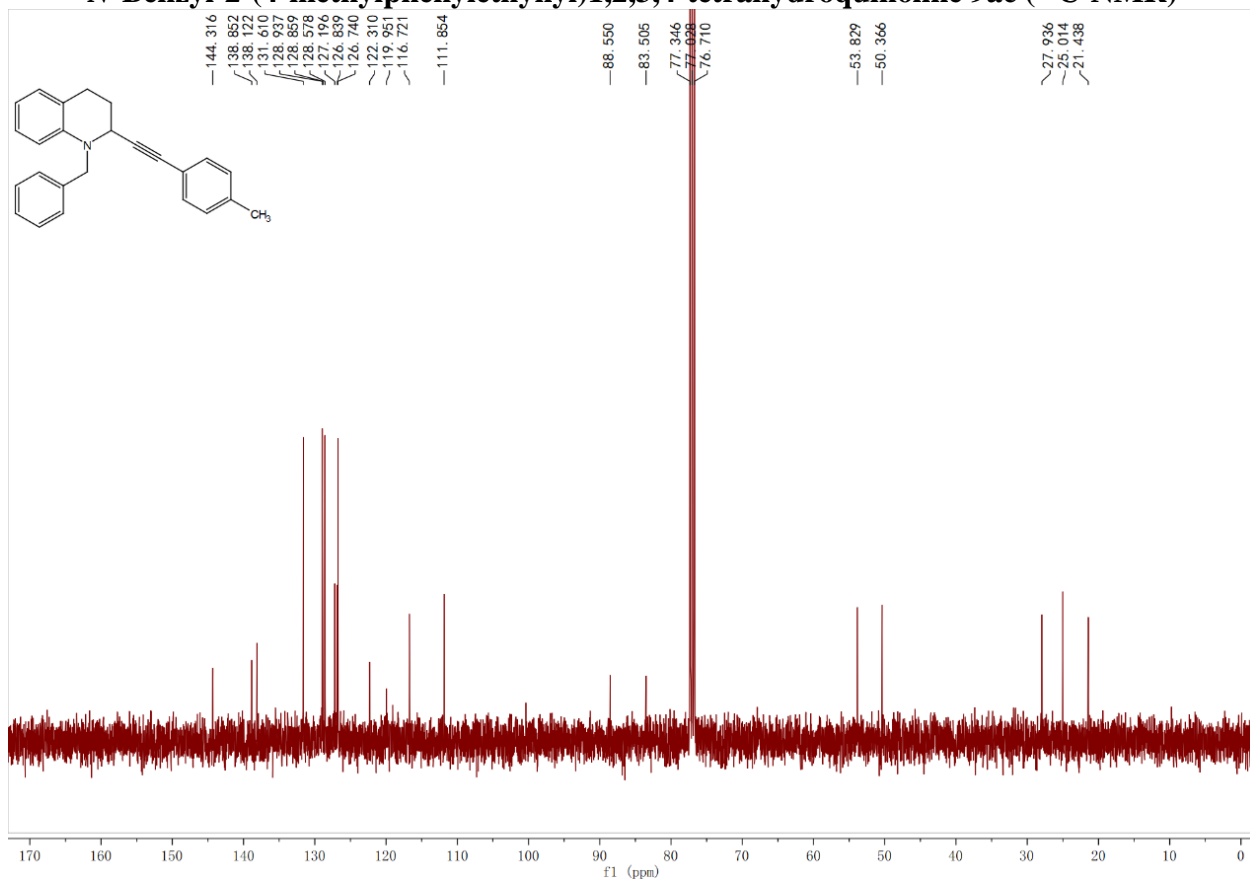

***N*-Benzyl-2-(4-fluorophenylethynyl)-1,2,3,4-tetrahydroquinoline 9ad (<sup>1</sup>H-NMR)**

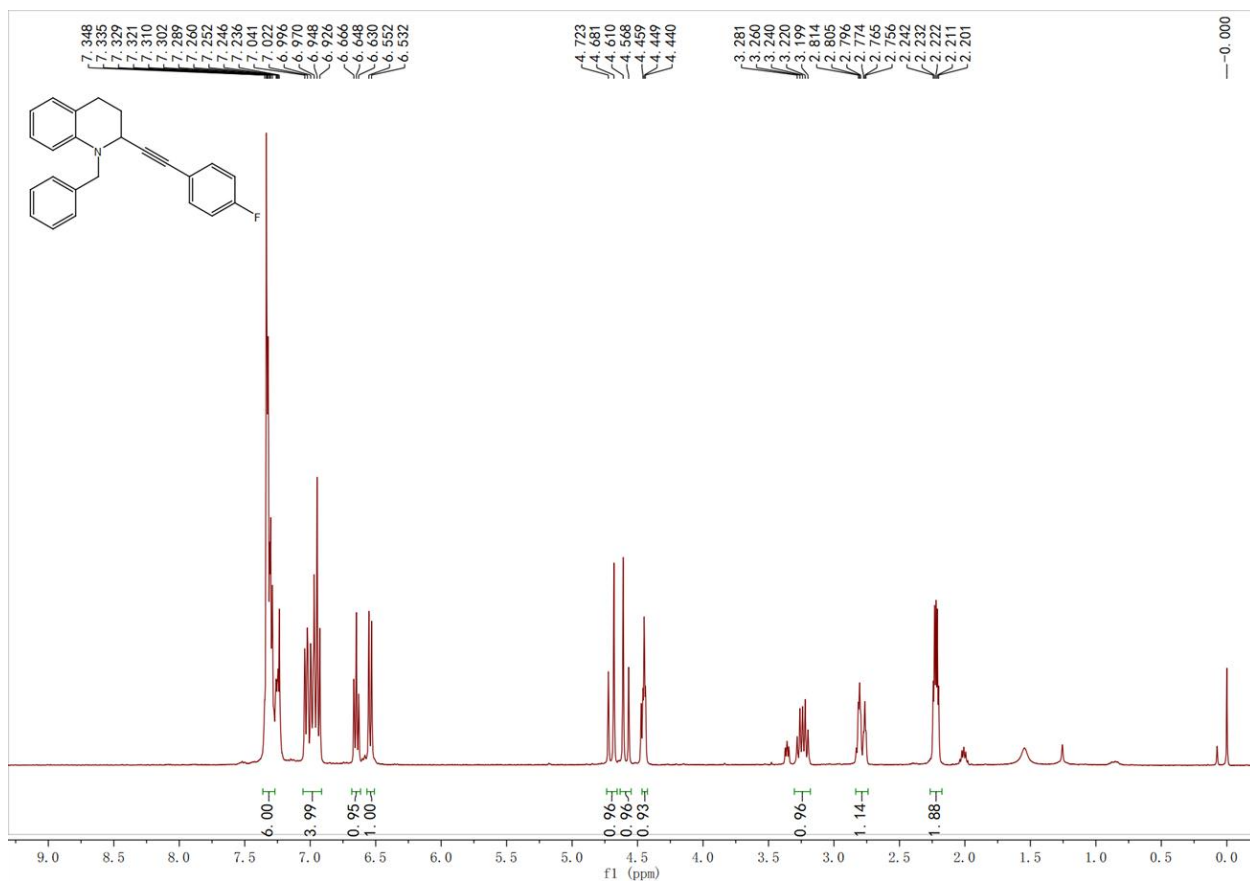

***N*-Benzyl-2-(4-fluorophenylethynyl)-1,2,3,4-tetrahydroquinoline 9ad (<sup>13</sup>C-NMR)**

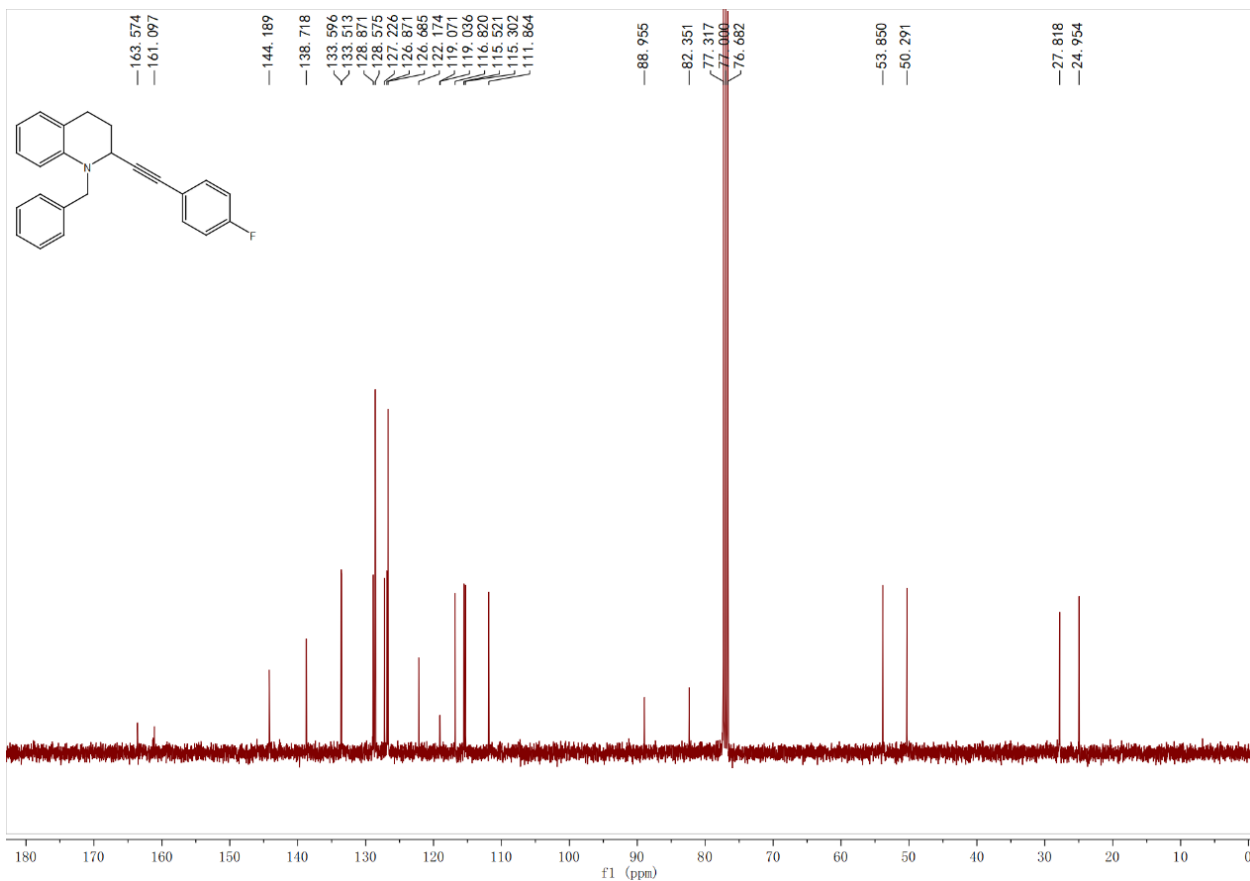

***N*-Benzyl-2-(4-chlorophenylethynyl)-1,2,3,4-tetrahydroquinoline 9ae (<sup>1</sup>H-NMR)**

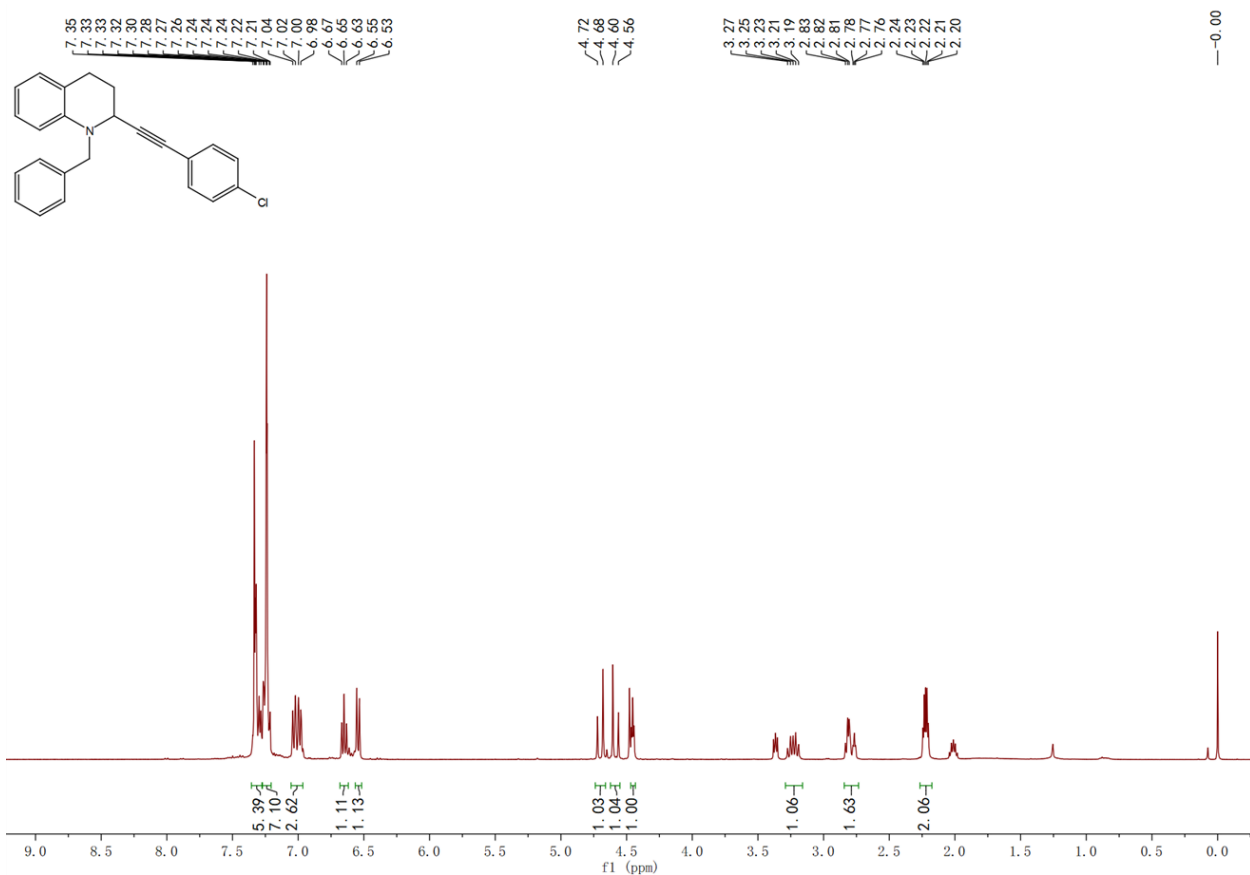



***N*-Benzyl-2-(4-chlorophenylethynyl)-1,2,3,4-tetrahydroquinoline 9ae (<sup>13</sup>C-NMR)**

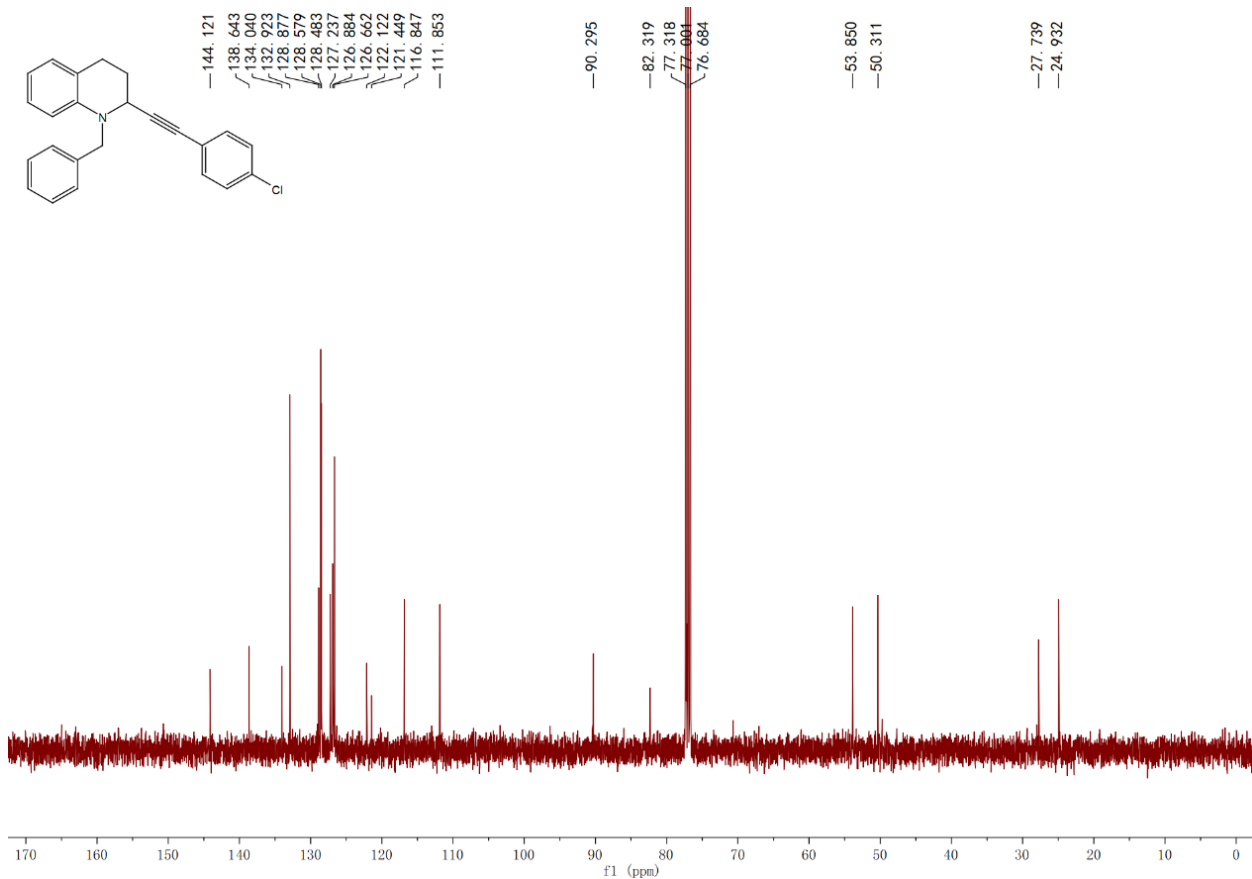

***N*-Benzyl-2-(4-methylformatephenylethynyl)-1,2,3,4-tetrahydroquinoline 9af (<sup>1</sup>H-NMR)**

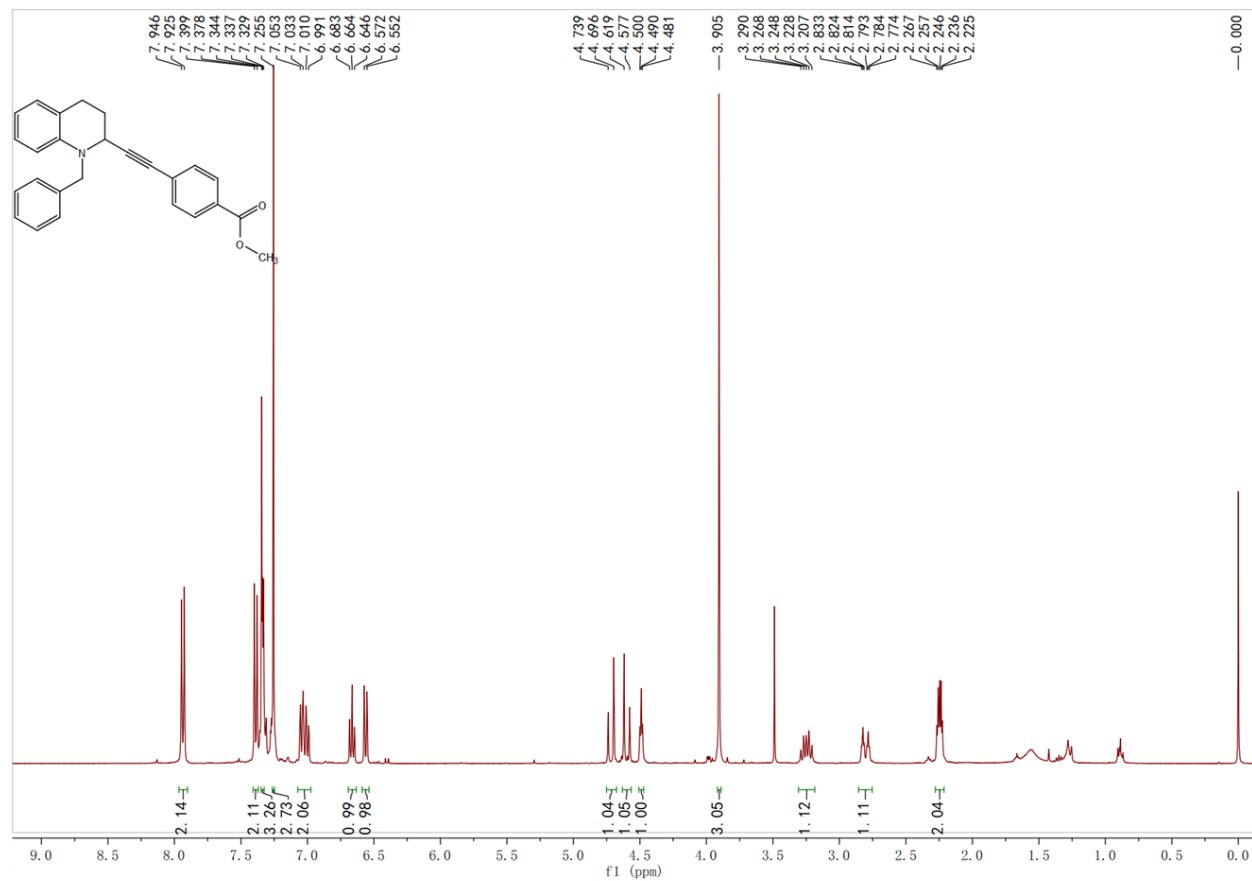

***N*-Benzyl-2-(4-methylformatephenylethynyl)-1,2,3,4-tetrahydroquinoline 9af (<sup>13</sup>C-NMR)**

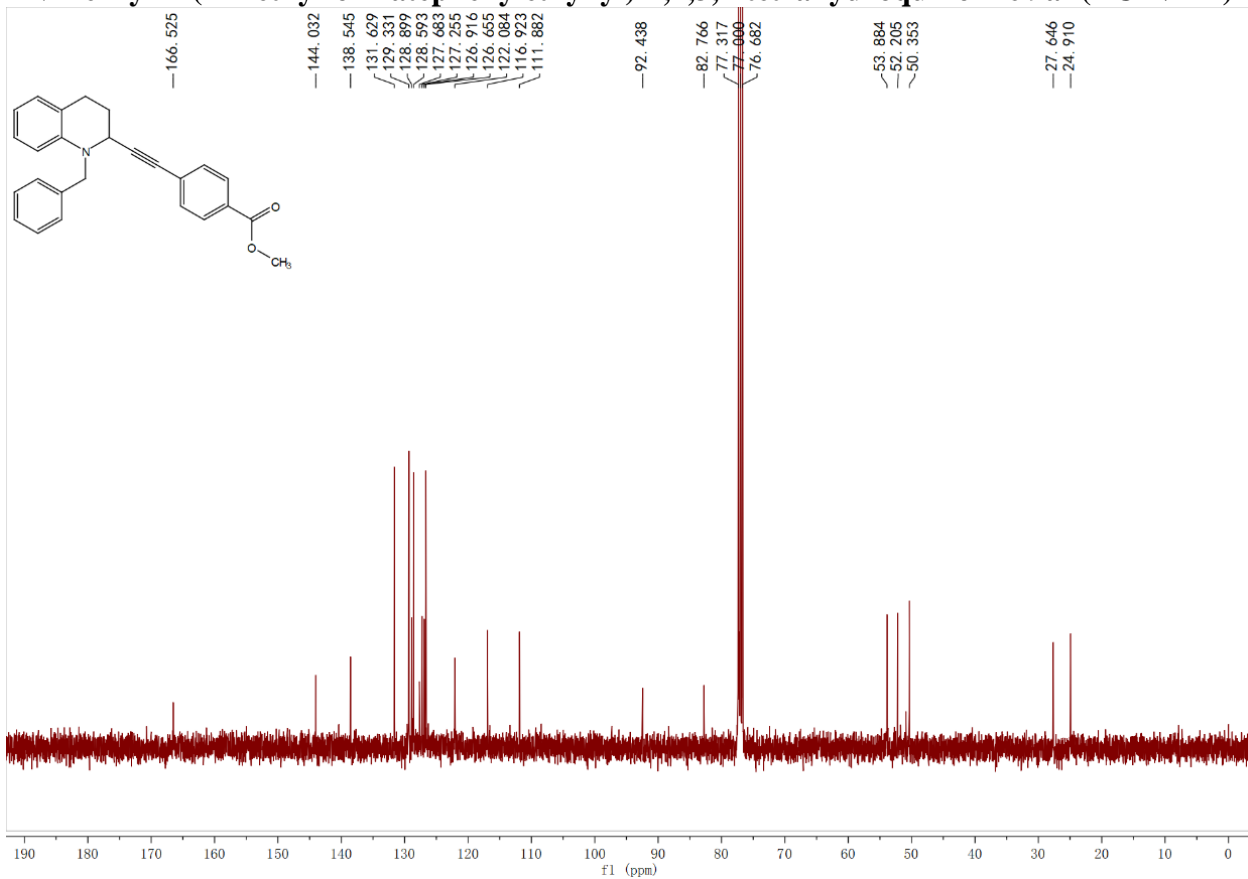

***N*-Benzyl-2-(3,4-dimethoxyphenylethynyl)-1,2,3,4-tetrahydroquinoline 9dg (<sup>1</sup>H-NMR)**

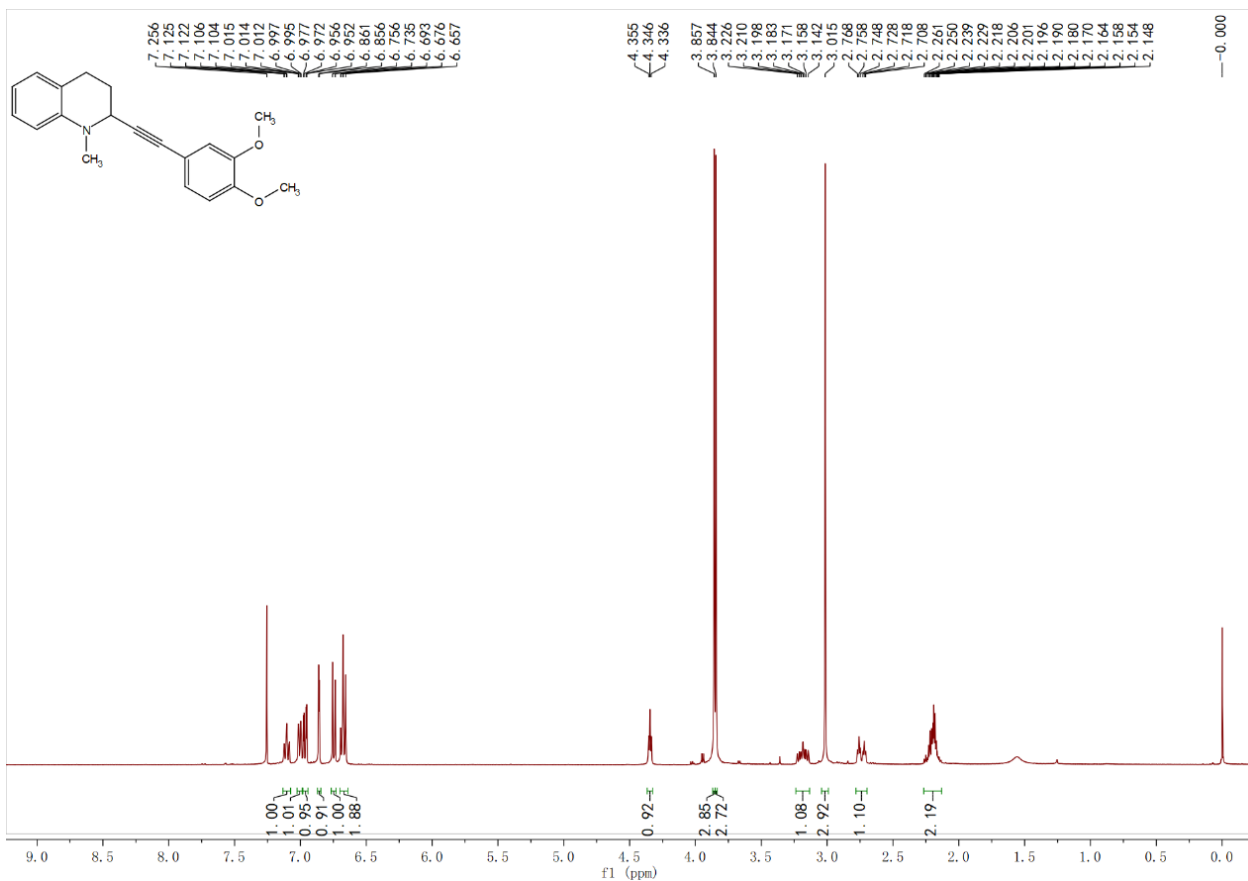

***N*-Benzyl-2-(3,4-dimethoxyphenylethynyl)-1,2,3,4-tetrahydroquinoline 9dg (<sup>13</sup>C-NMR)**

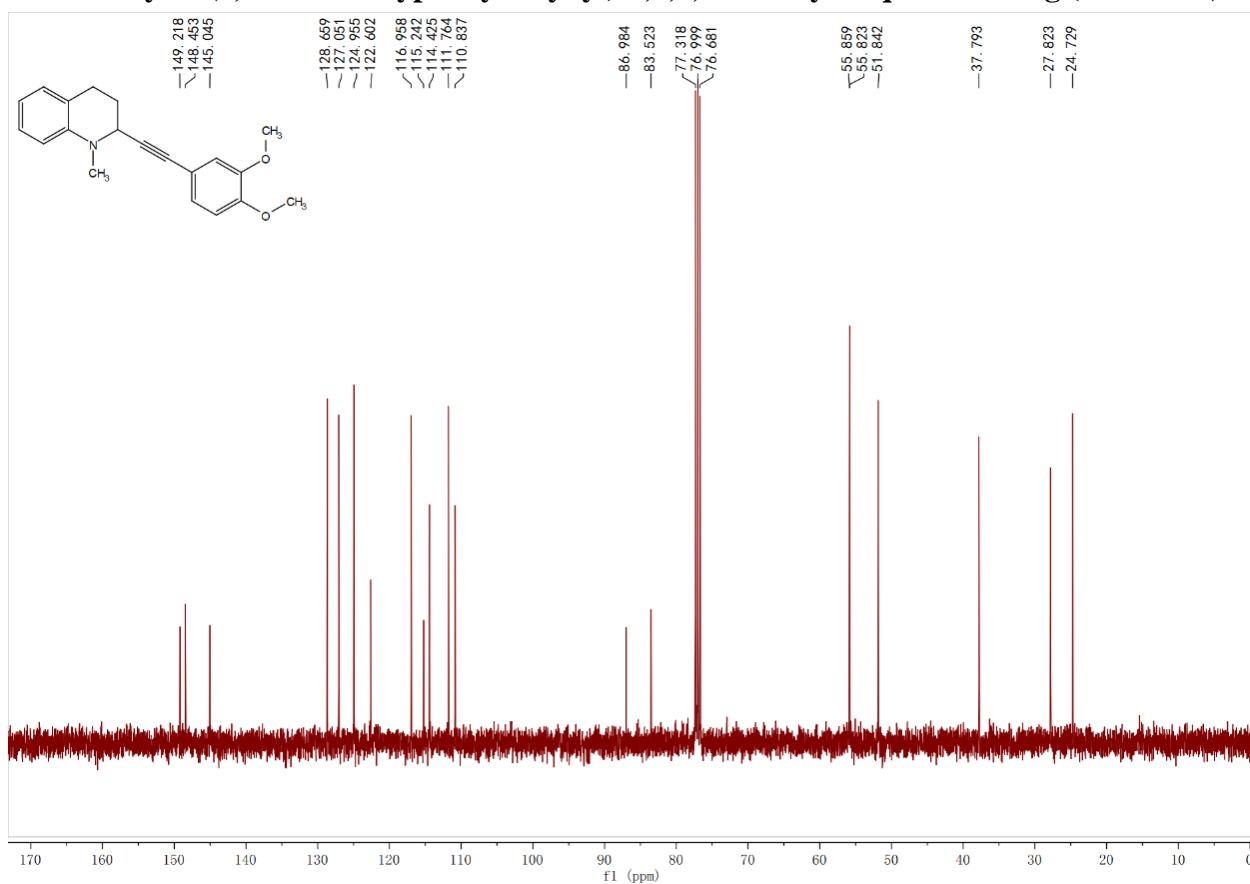

***N*-Benzyl-2-(3,4-dimethoxymethylenephenelethynyl)-1,2,3,4-tetrahydroquinoline 9dh (<sup>1</sup>H-NMR)**

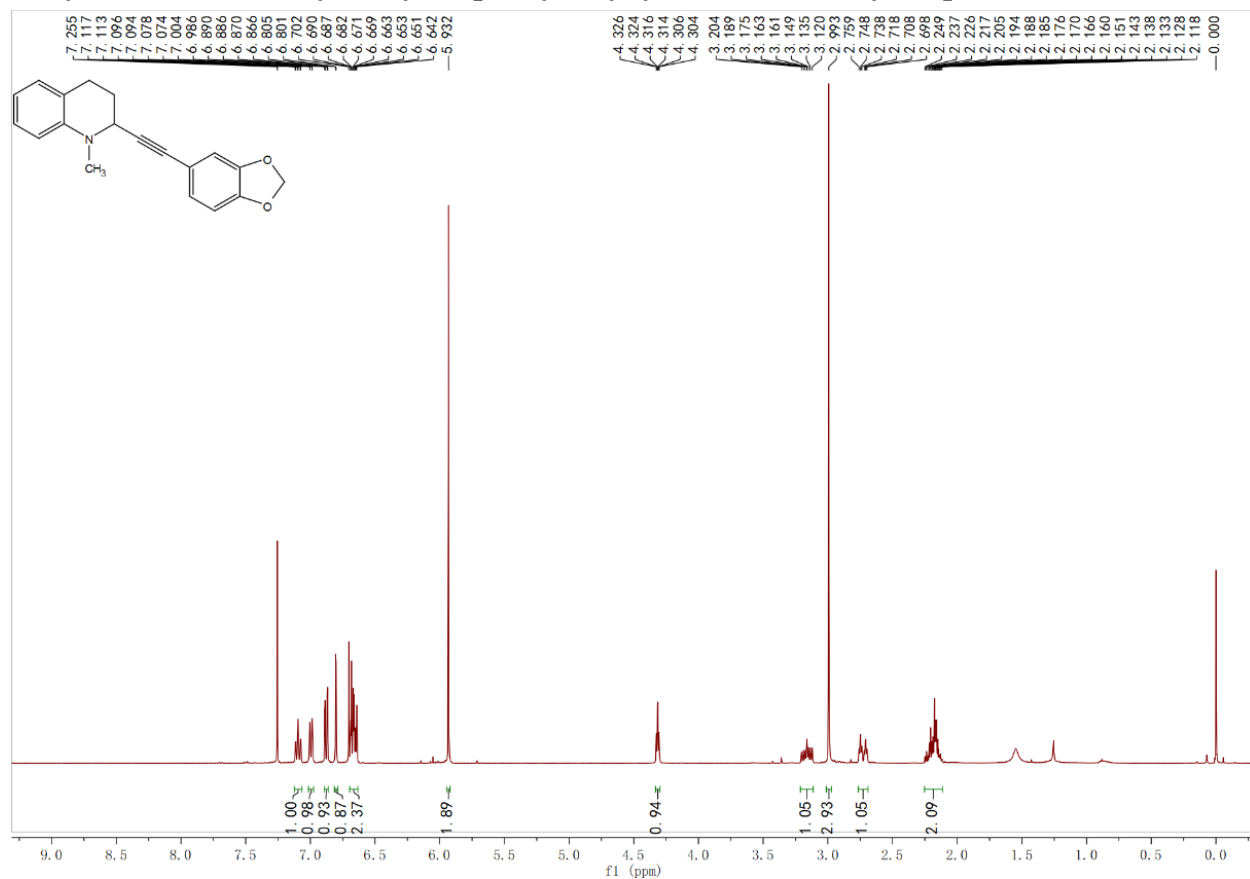

***N*-Benzyl-2-(3,4-dimethoxymethylenephénylethynyl)-1,2,3,4-tetrahydroquinoline 9dh (<sup>13</sup>C-NMR)**

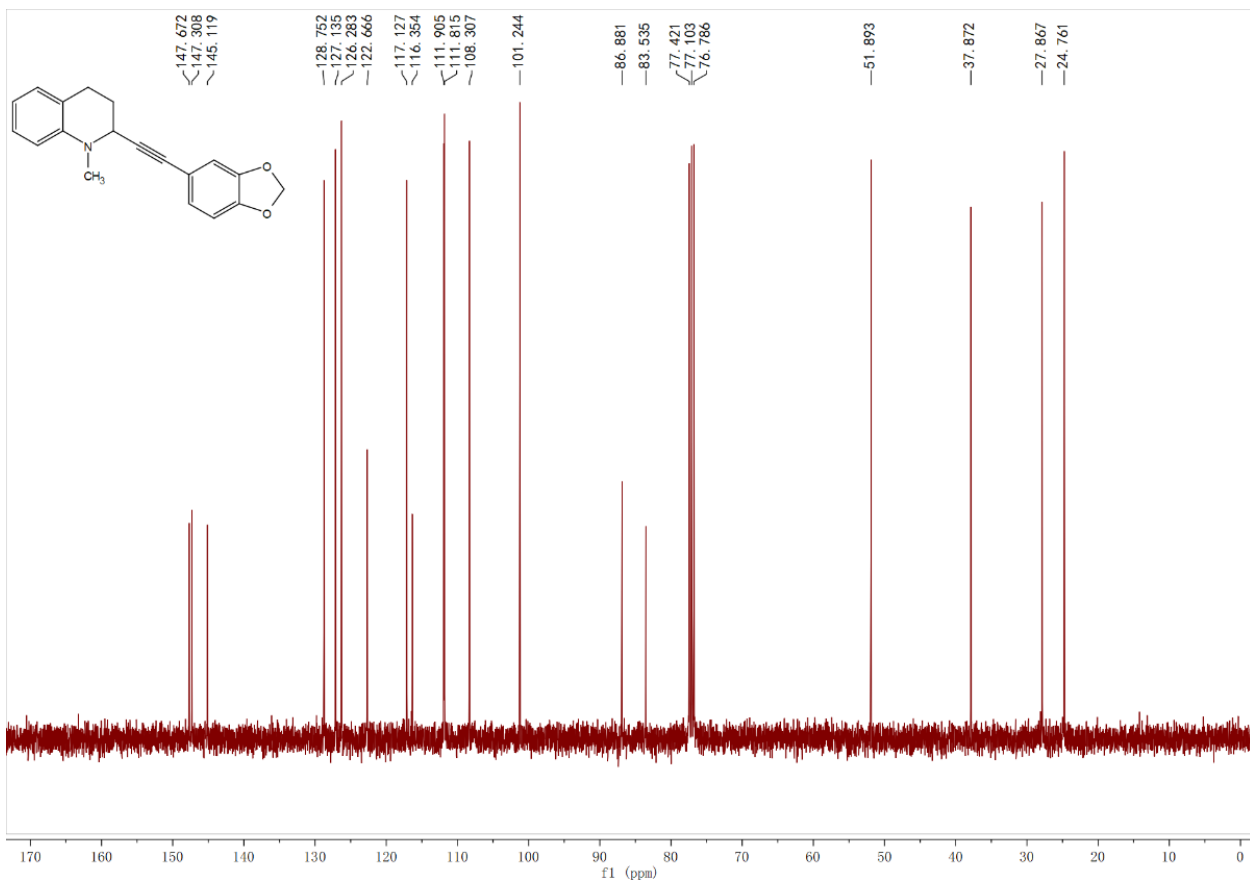

***N*-Benzyl-2-(3,4-dimethoxyphenylethane)-1,2,3,4-tetrahydroquinoline 10 (<sup>1</sup>H-NMR)**

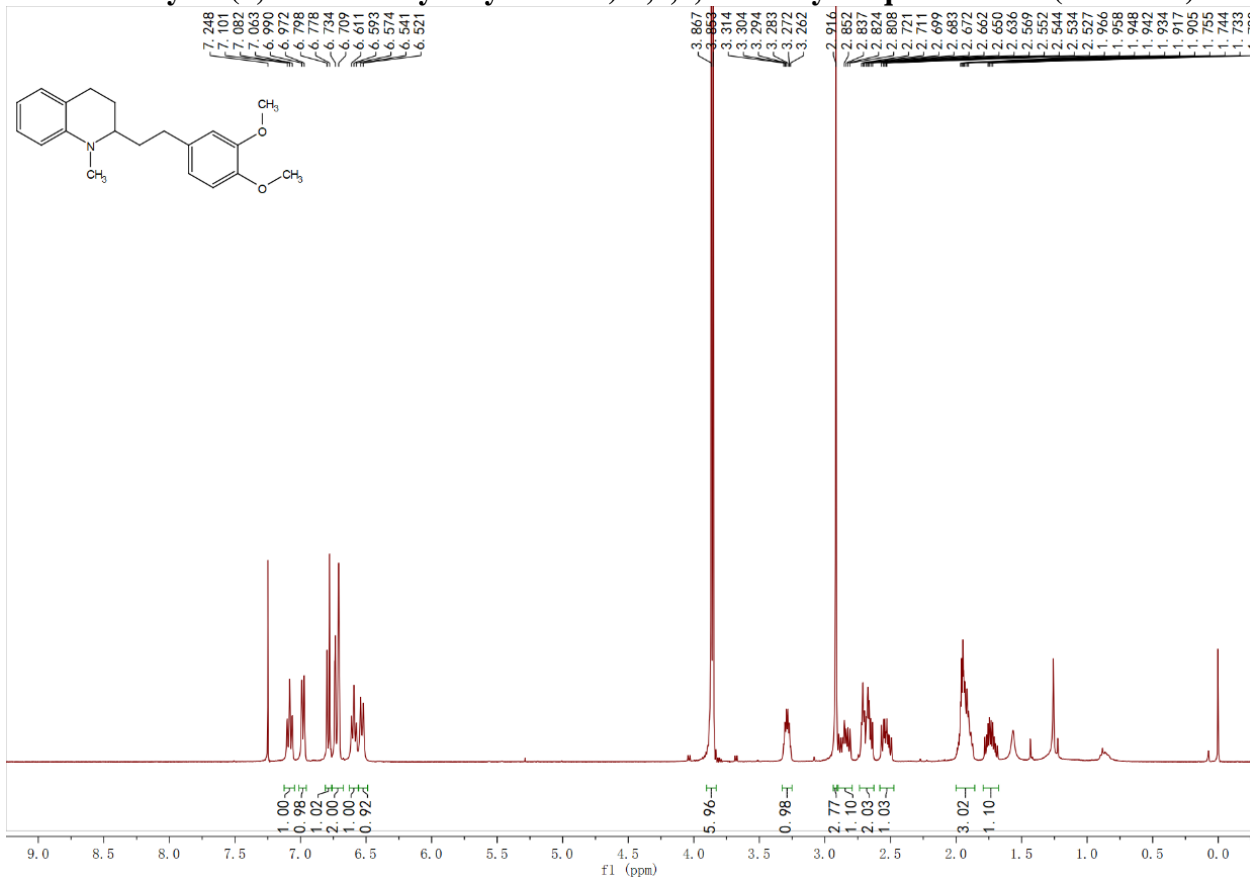



### 3-(1-Phenylvinyl)-4,5-dihydropyrrolo[1,2-a]quinoline 12 (<sup>13</sup>C-NMR)

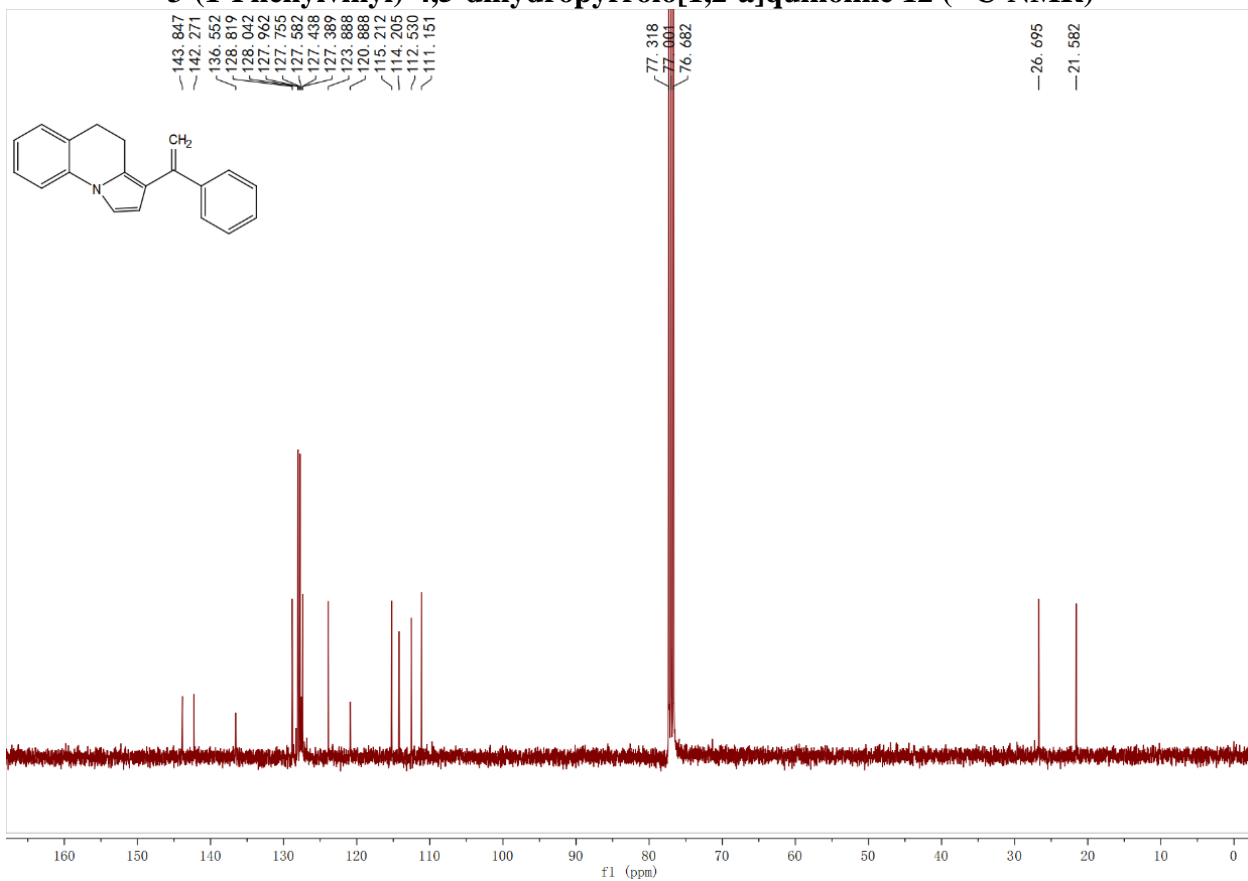

### N-Benzyl-2-(3-indolyl)-1,2,3,4-tetrahydroquinoline 22a (<sup>1</sup>H-NMR)

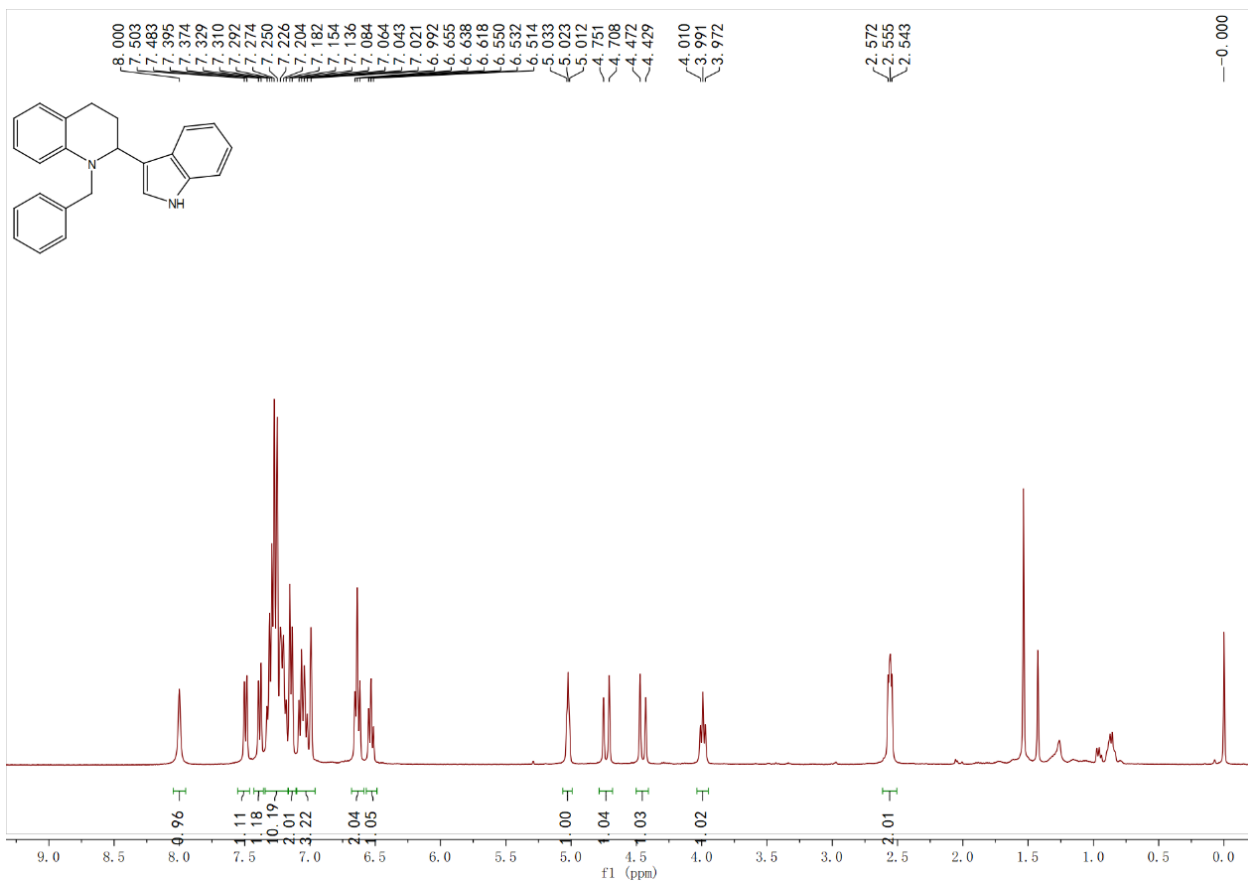

### Compound *d*-22a (<sup>1</sup>H-NMR)

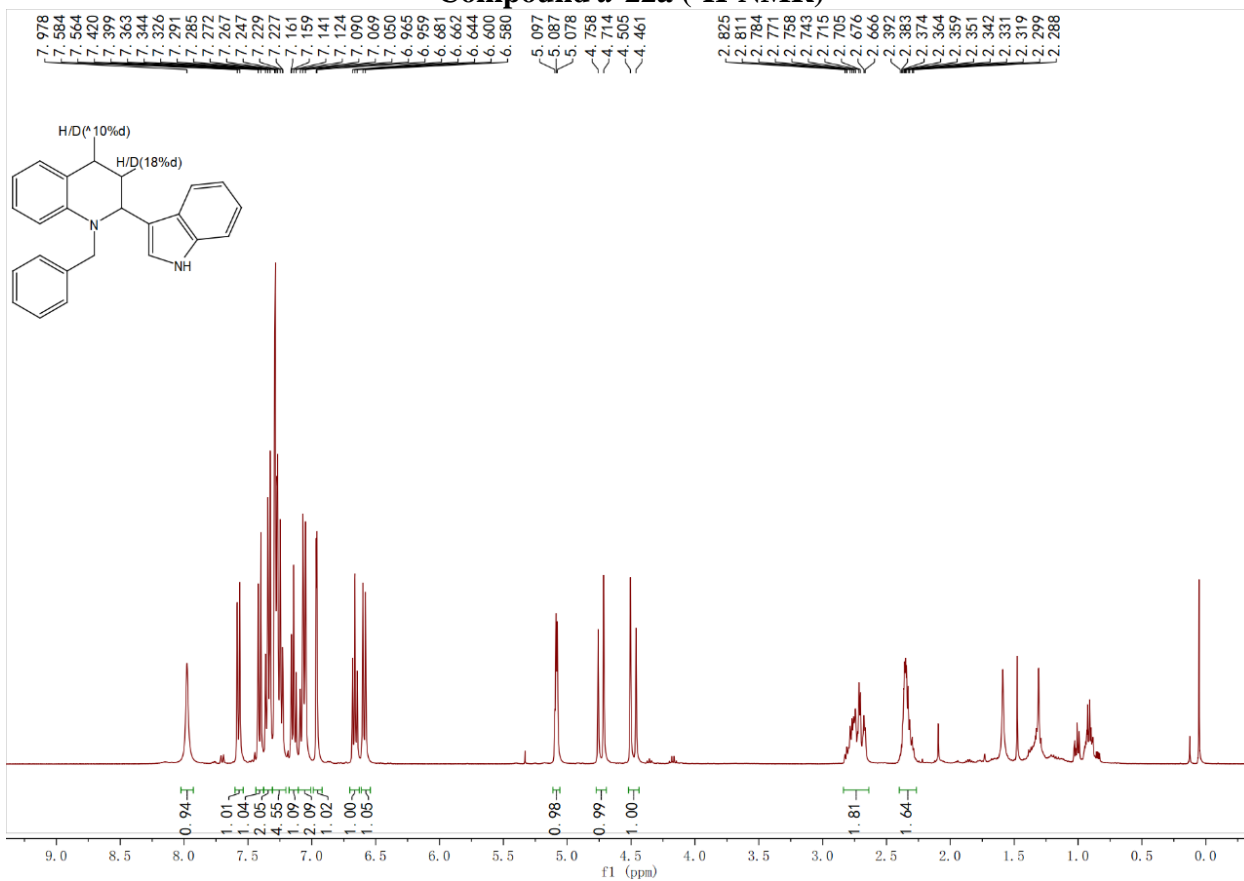

### Compound *d*-1a (<sup>1</sup>H-NMR)

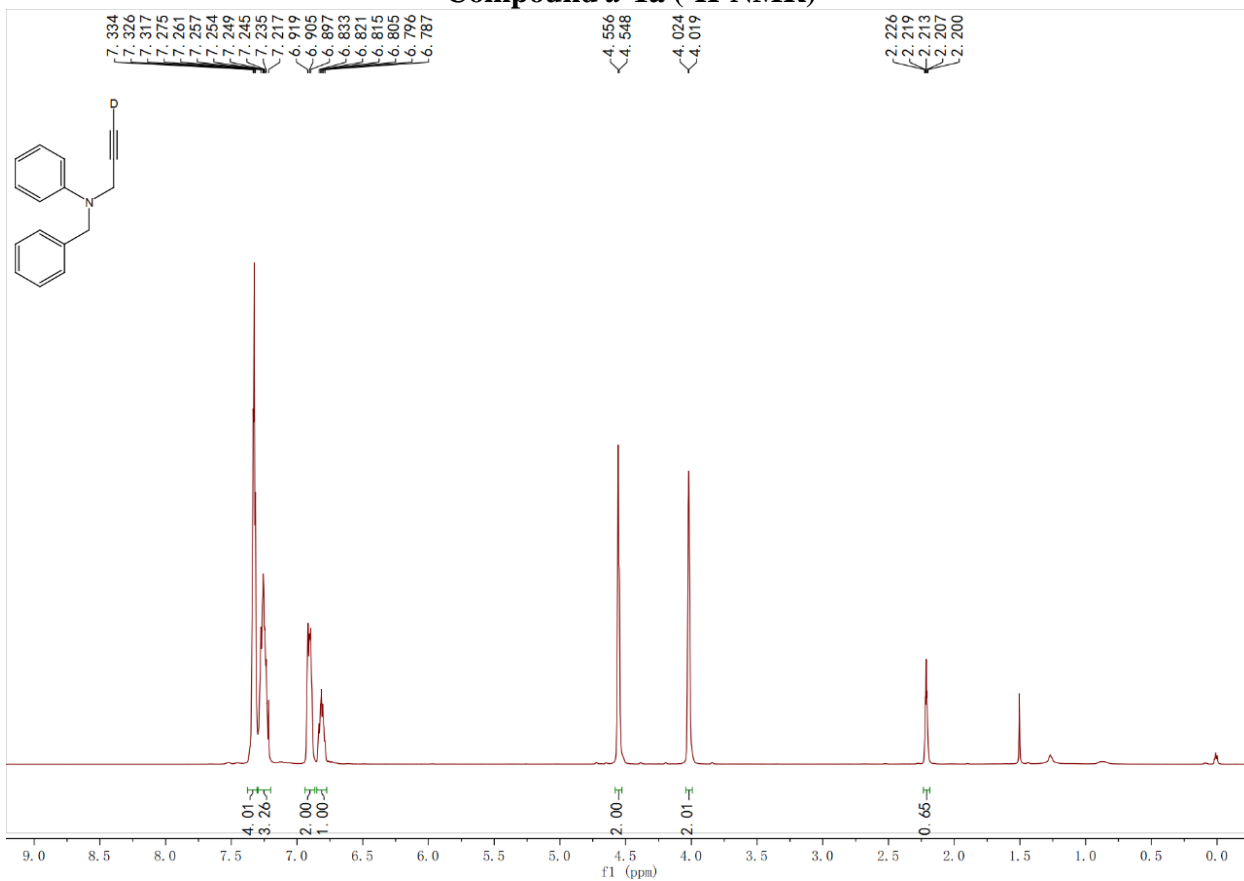

### *N*-Benzyl-2-(3-indolyl)-4-phenyl-1,2,3,4-tetrahydroquinoline 22k (<sup>1</sup>H-NMR)

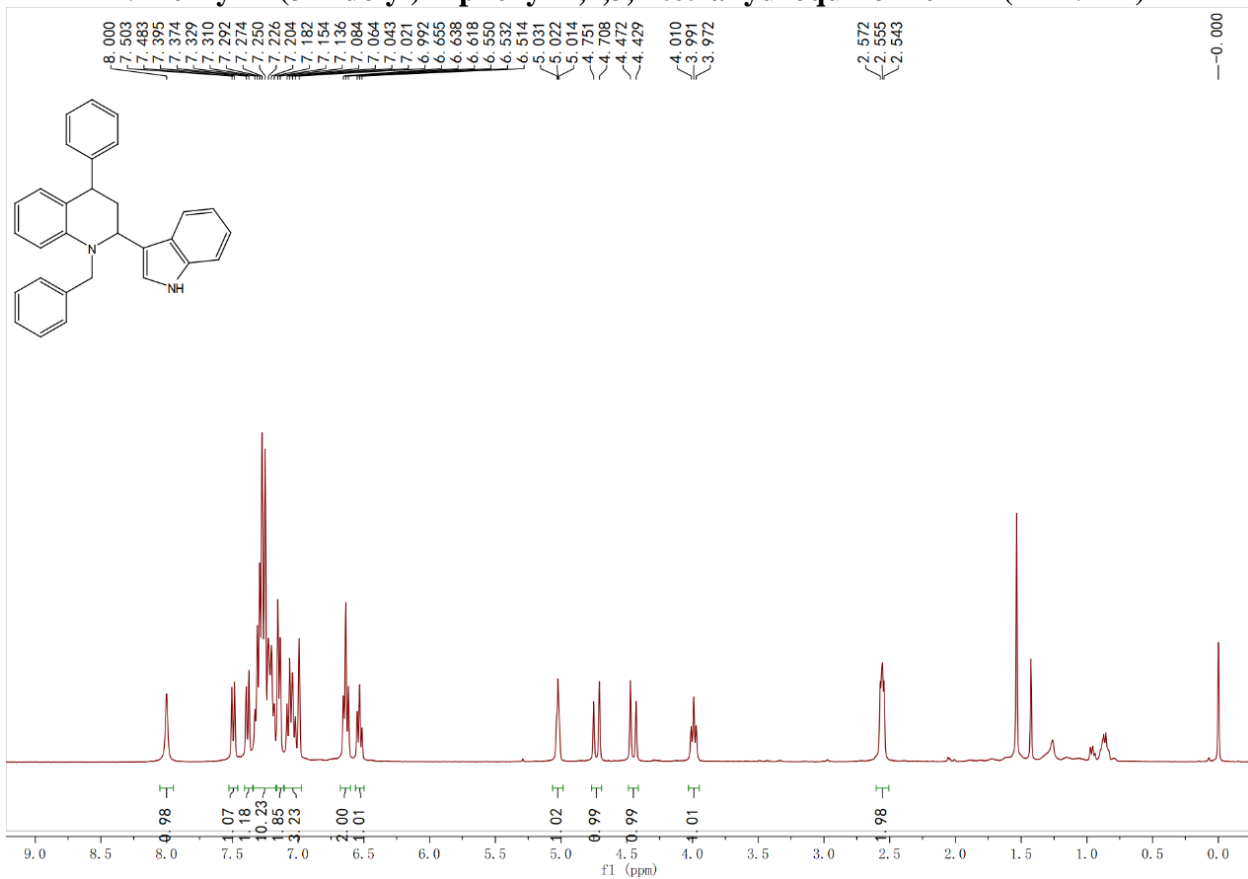

### Compound *d*-22k (<sup>1</sup>H-NMR)

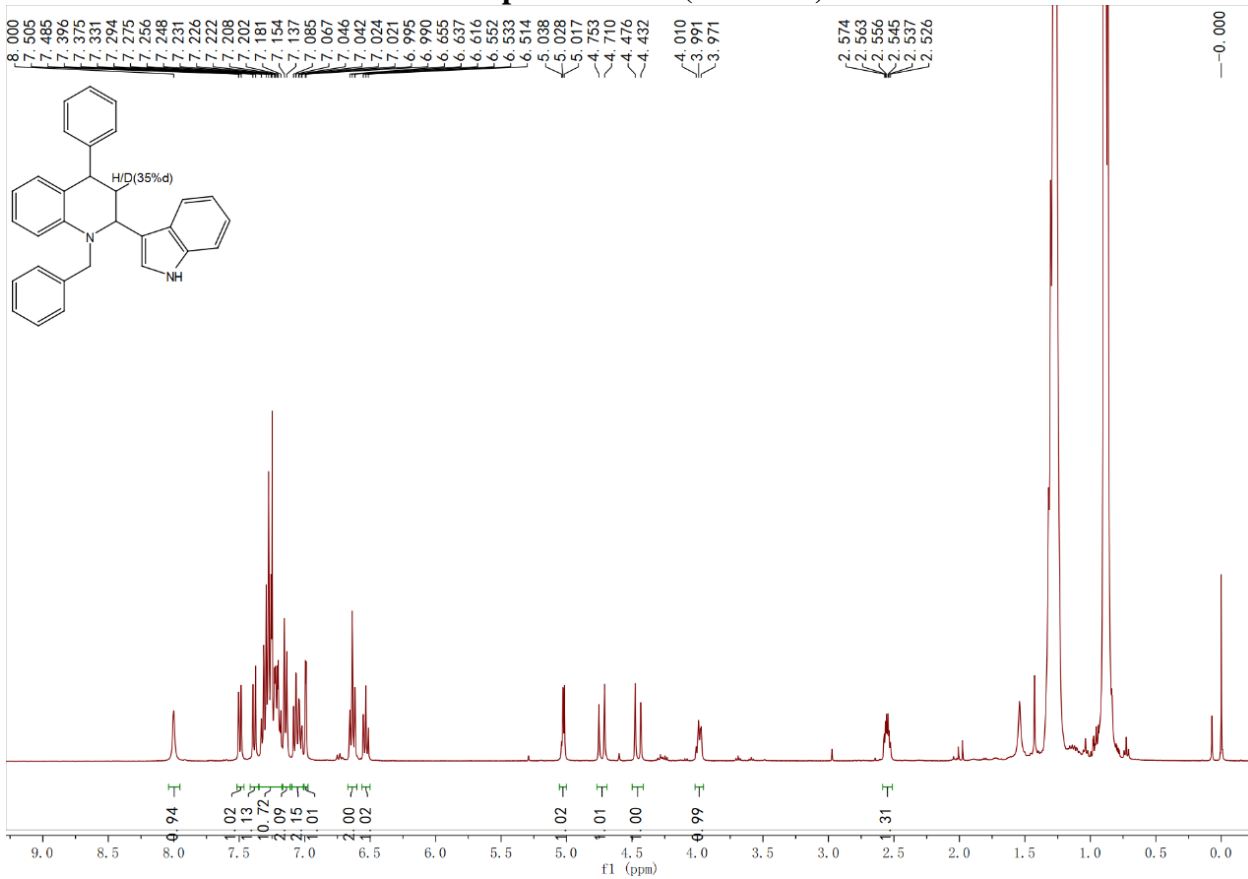

### Compound *d*-9aa (<sup>1</sup>H-NMR)



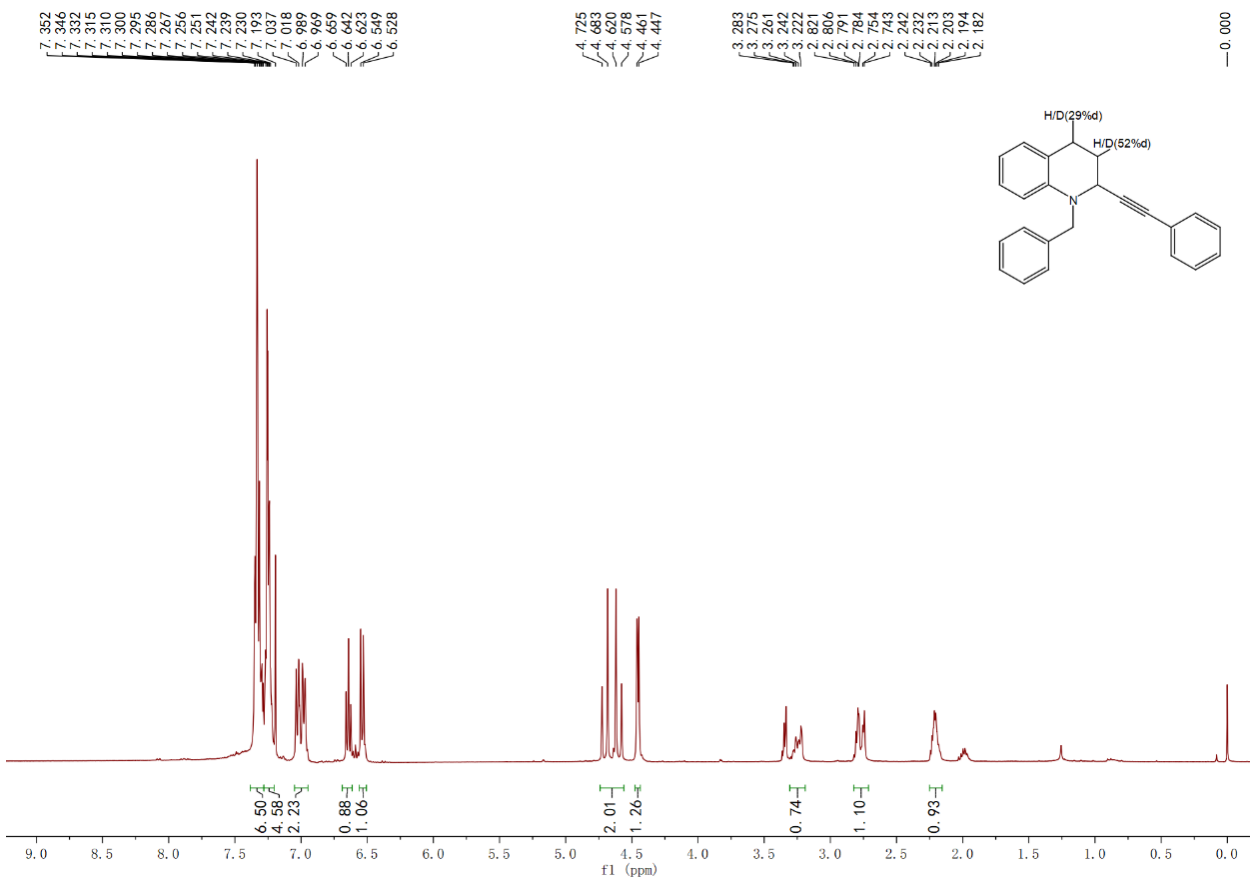

**Compound *d*-9aa (Scheme 4, eq2) (<sup>1</sup>H-NMR)**

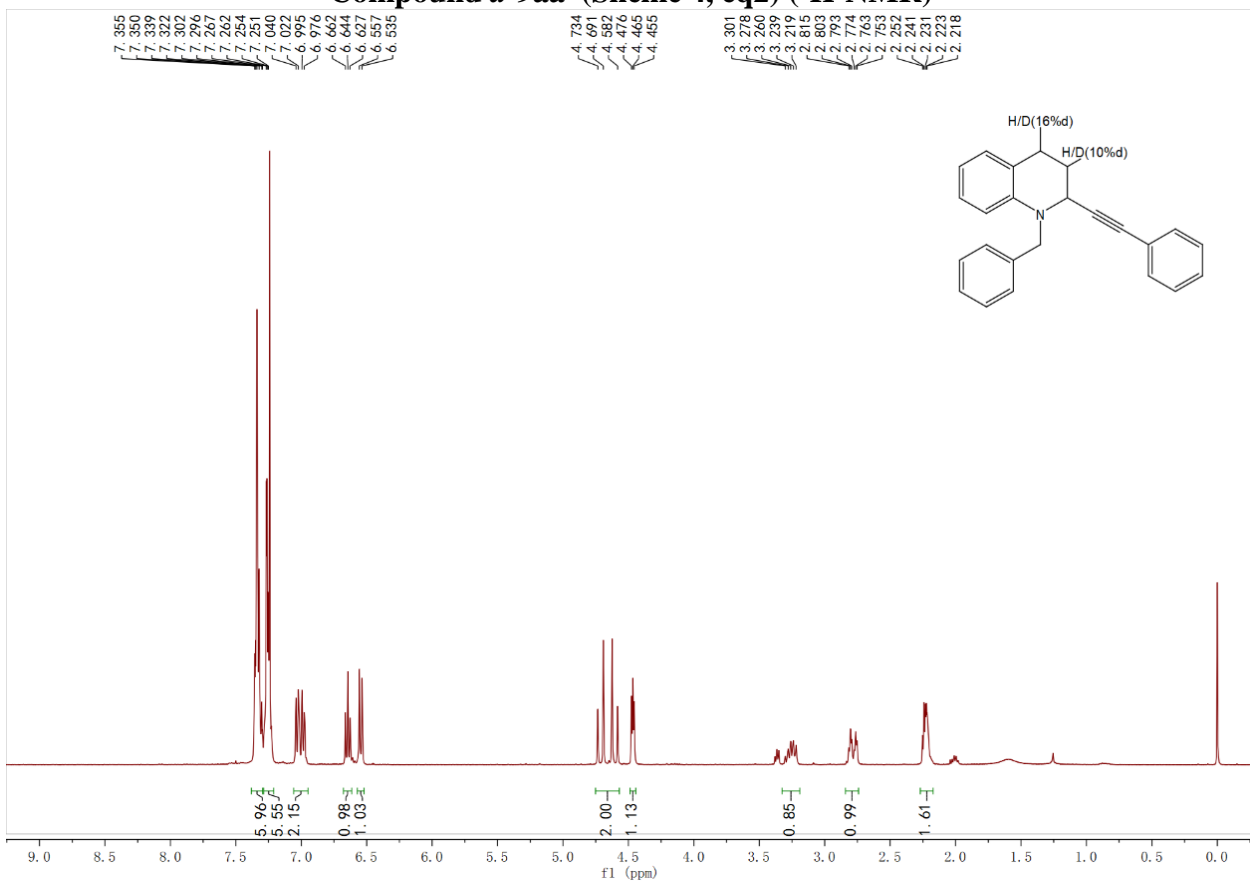

**Compound *d*-9aa (<sup>1</sup>H-NMR)**

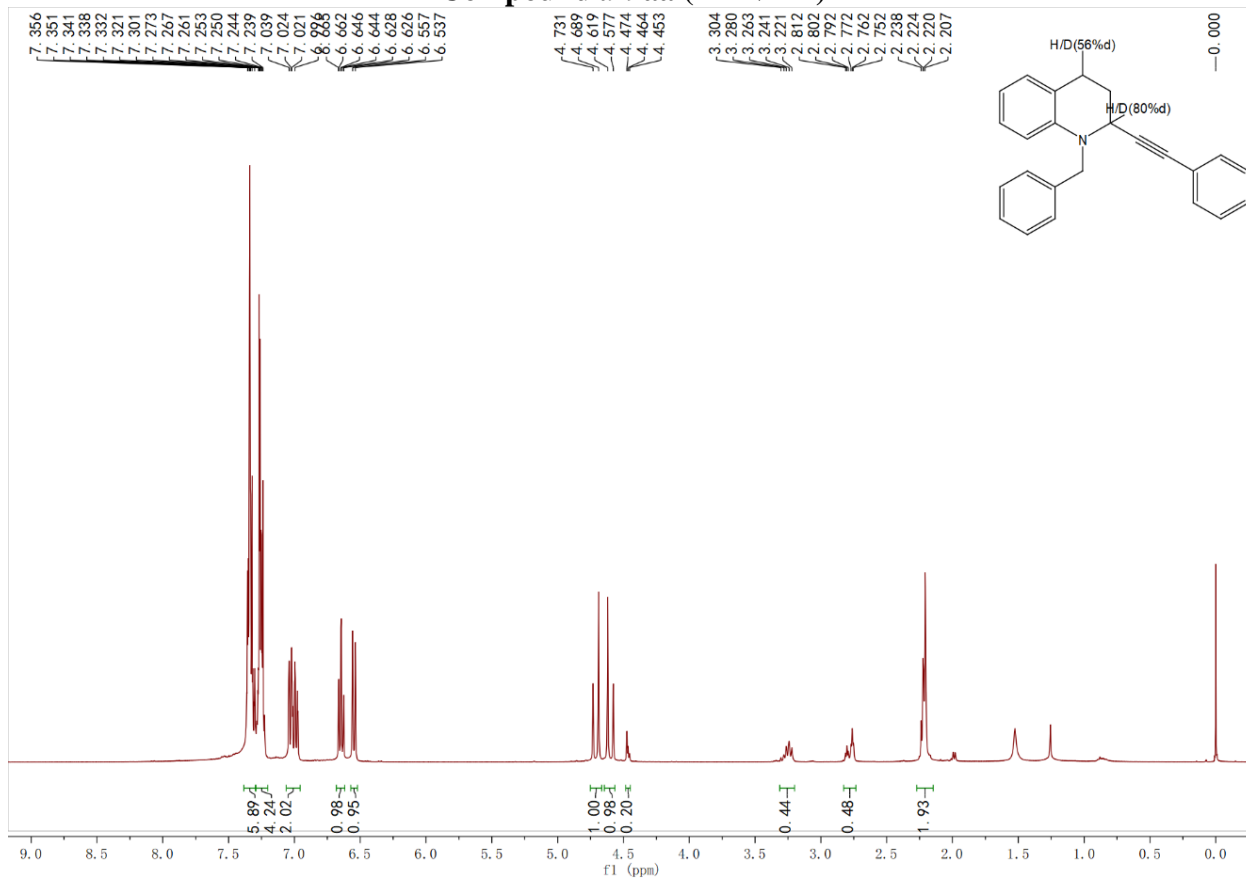

***N*-Benzyl-*N*-(2-propynyl)aniline 1a (<sup>1</sup>H-NMR)**

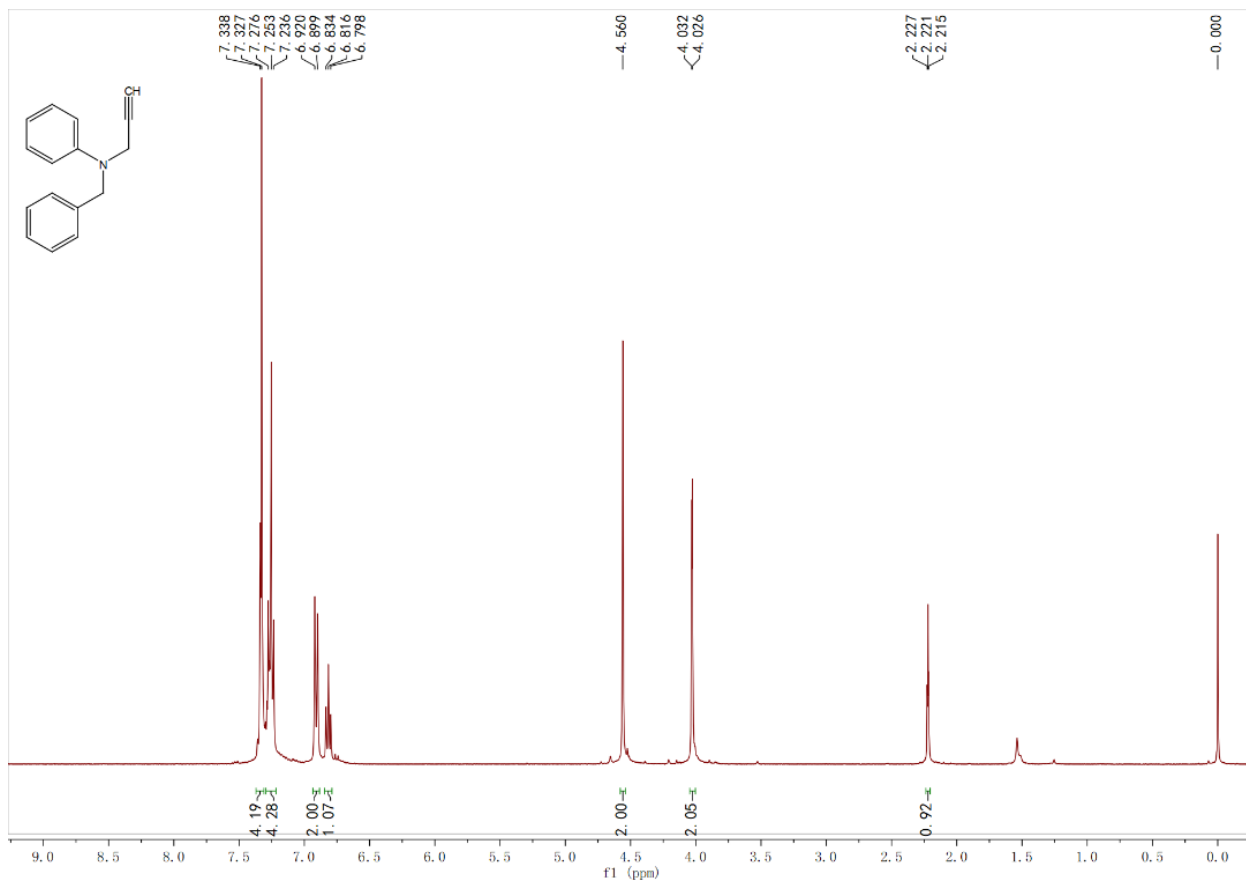

### *N*-Phenyl-*N*-(2-propynyl)aniline 1b (<sup>1</sup>H-NMR)

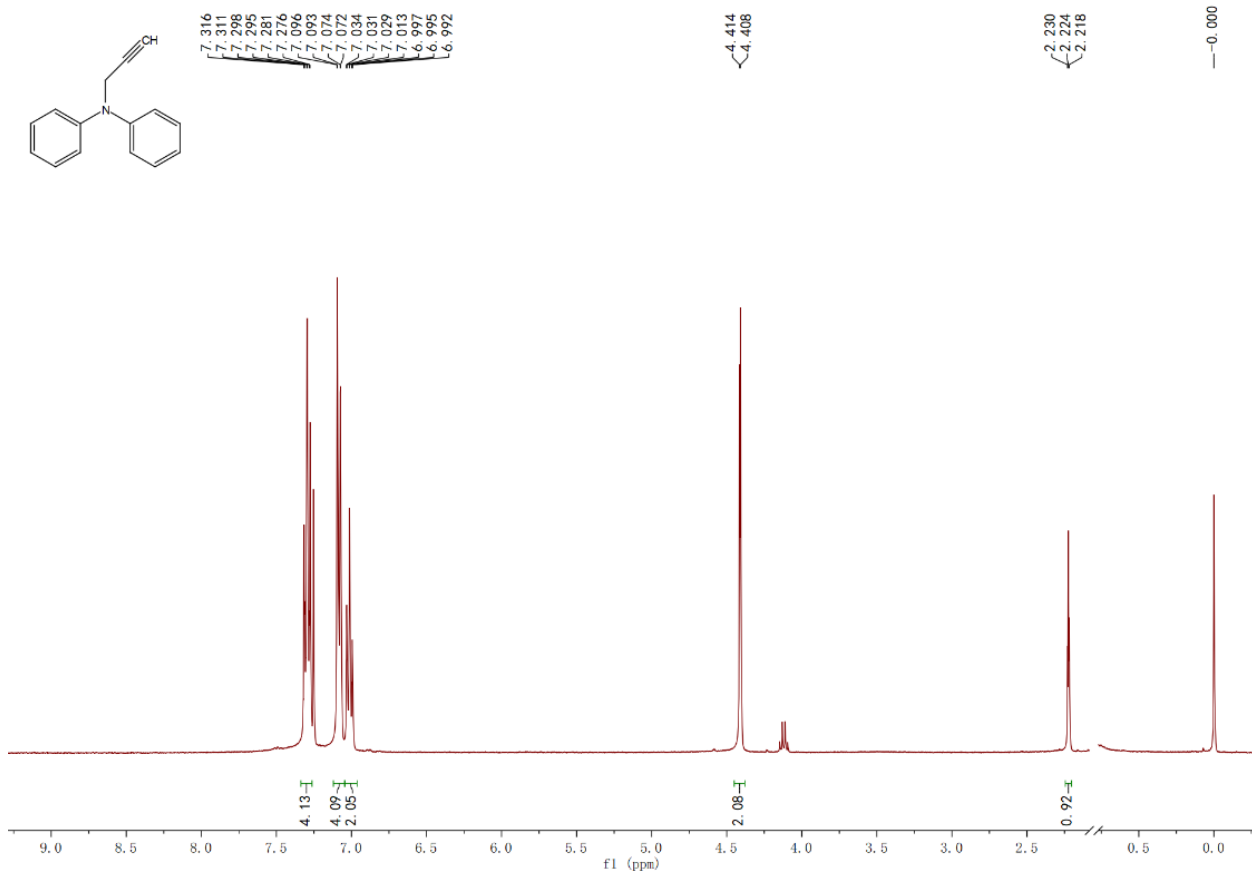

### *N*-Allyl-*N*-(2-propynyl)aniline 1c (<sup>1</sup>H-NMR)

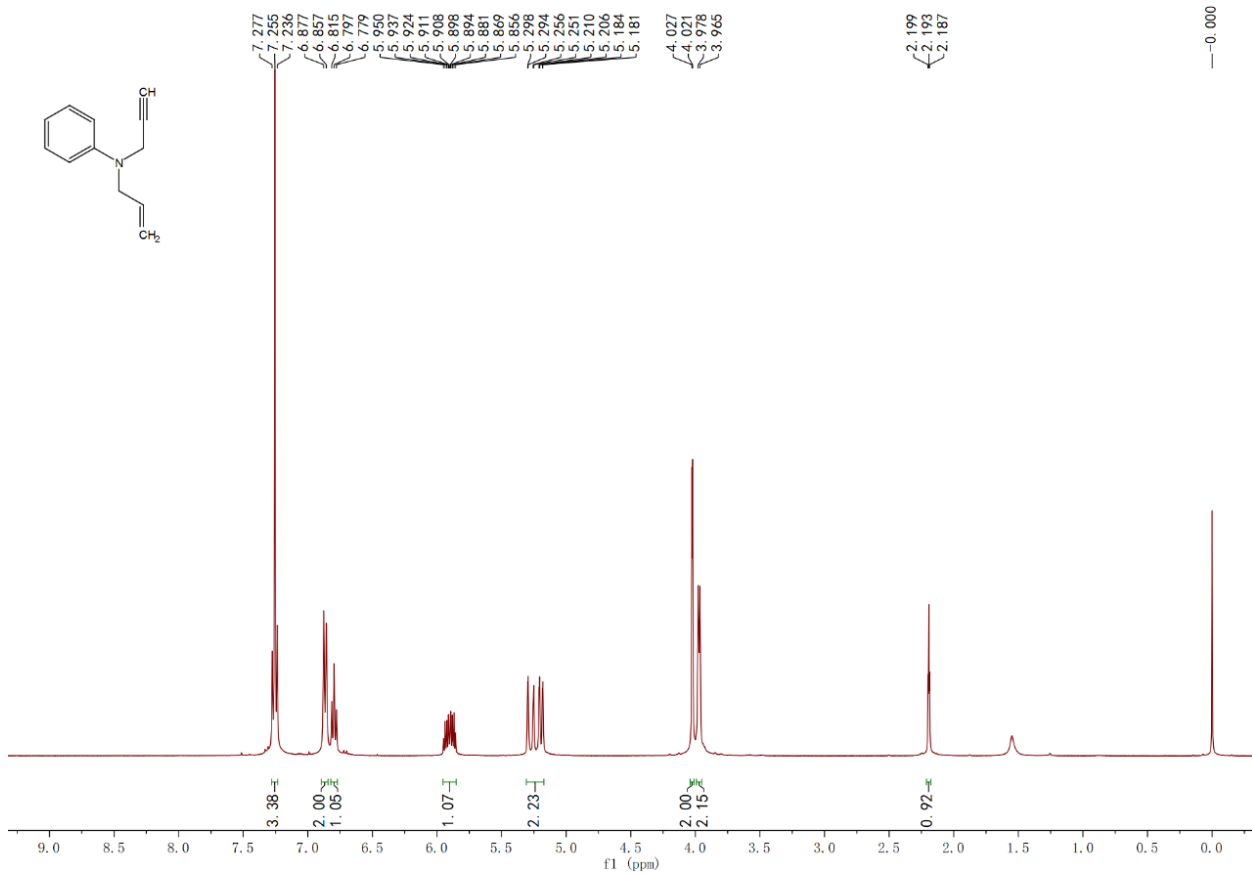

***N*-Methyl-*N*-(2-propynyl)aniline 1d (<sup>1</sup>H-NMR)**

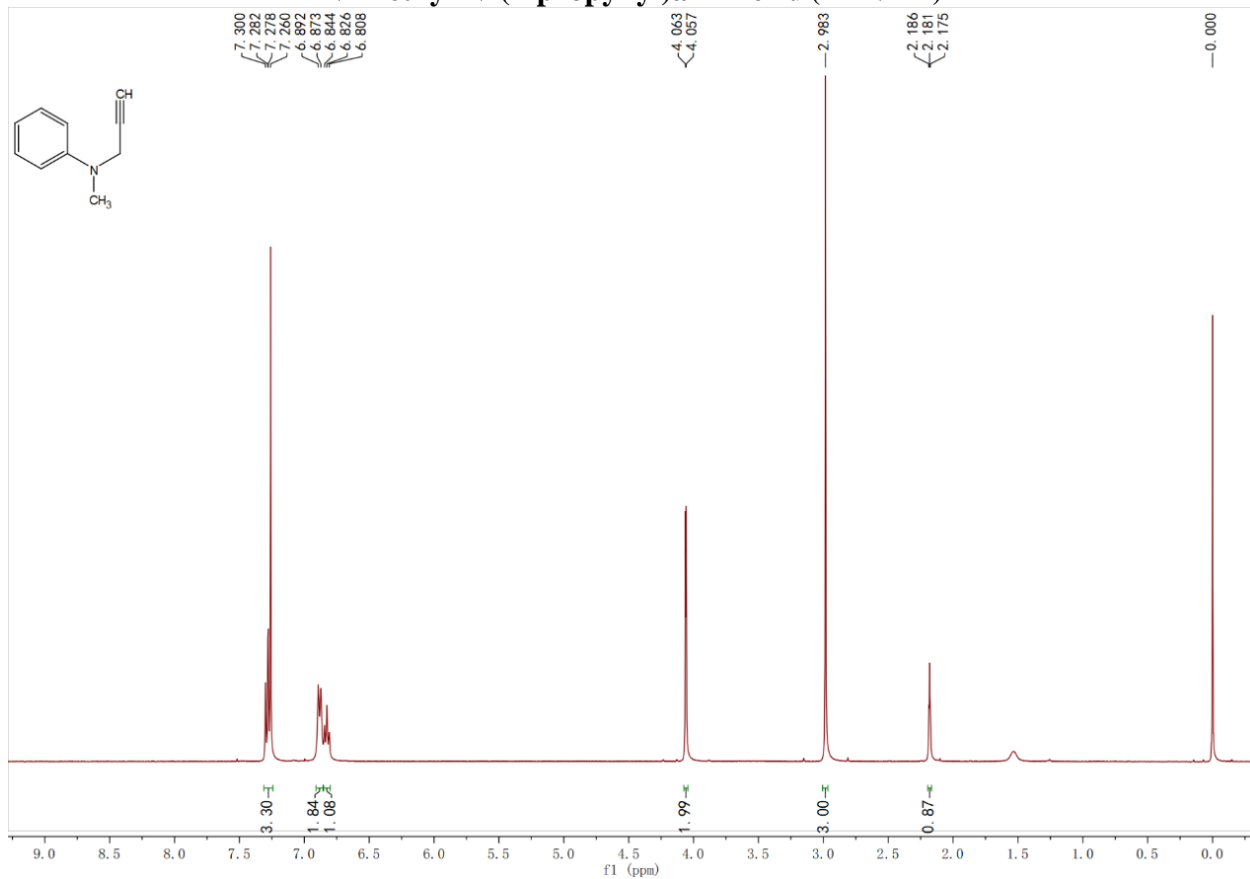

***Ethyl-N*-phenyl-*N*-(prop-2-yn-1-yl)glycinate 1e (<sup>1</sup>H-NMR)**

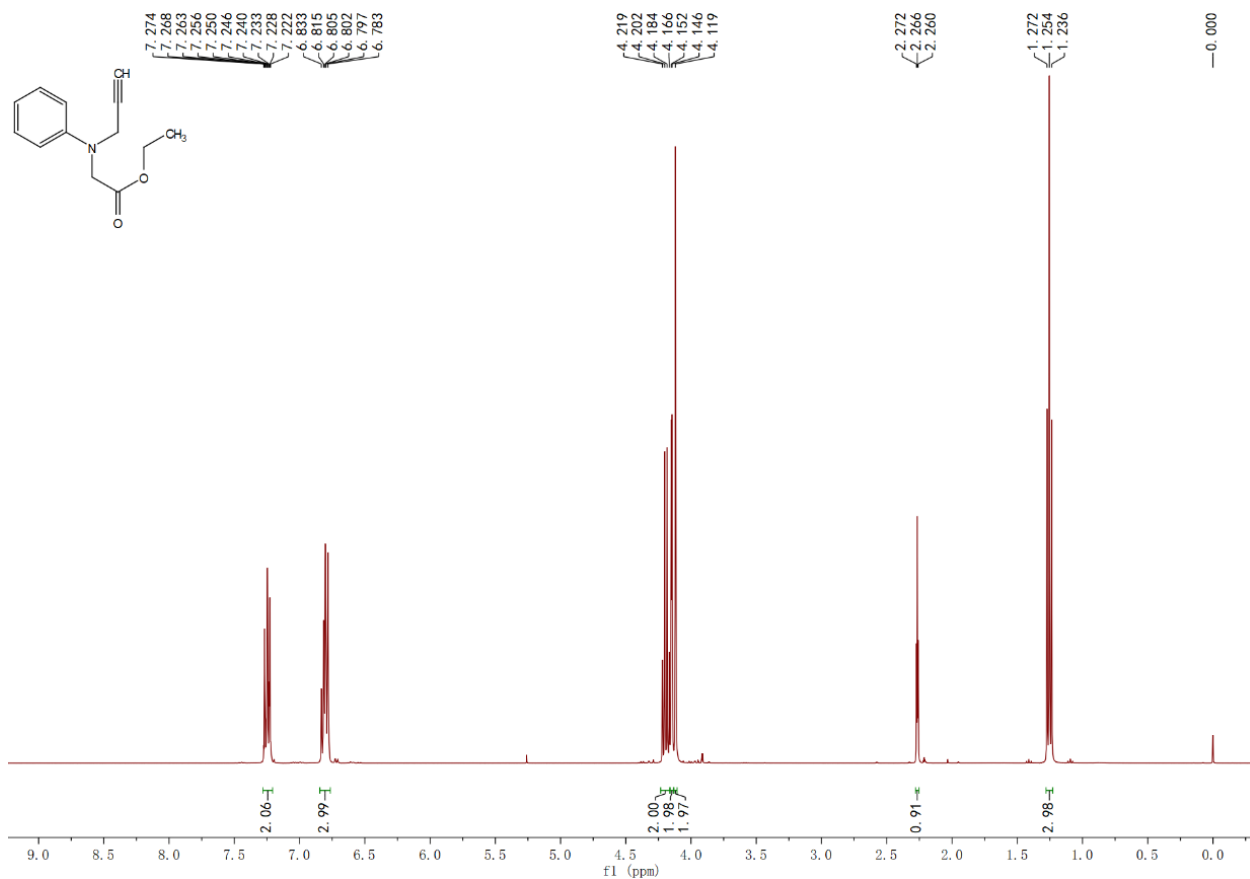

### Ethyl-N-phenyl-N-(prop-2-yn-1-yl)glycinate 1e (<sup>13</sup>C-NMR)

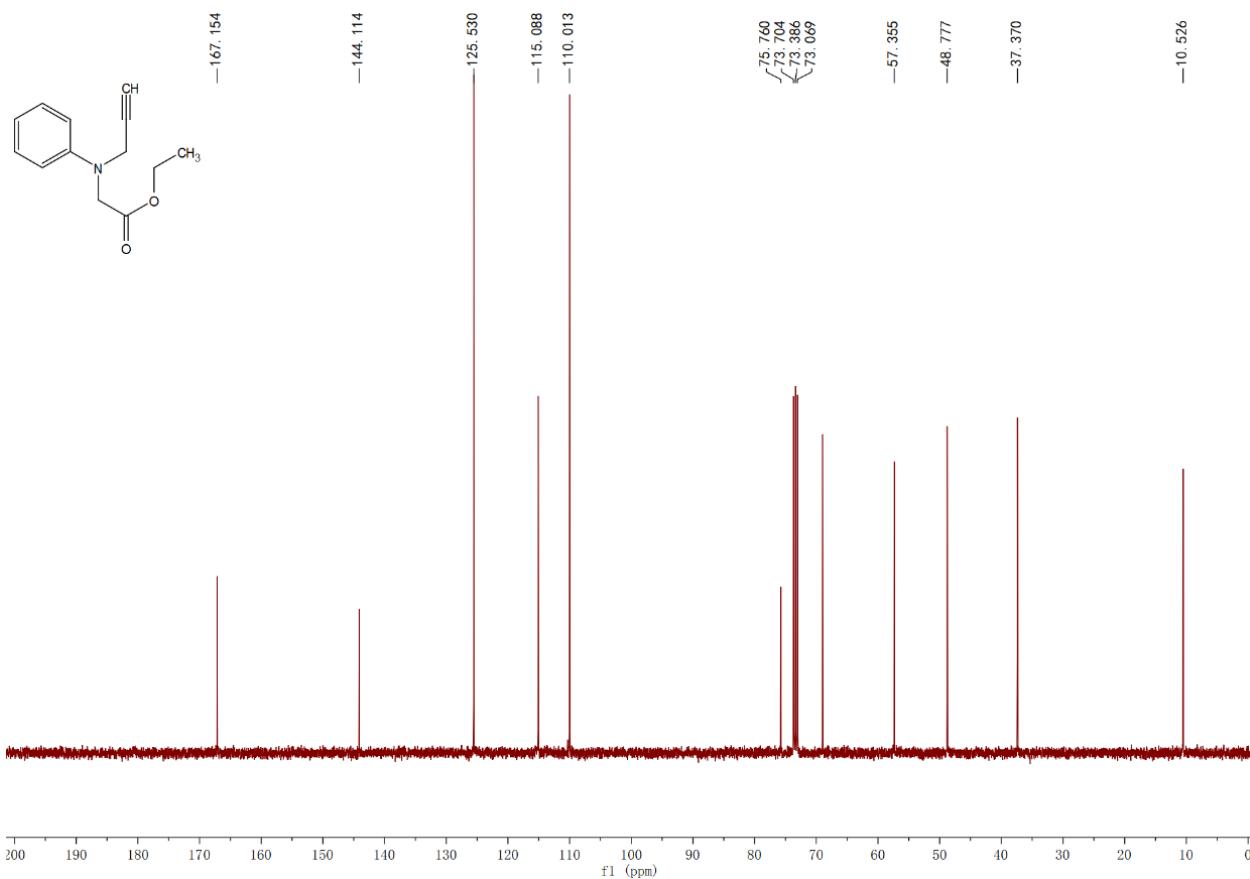

### N-(2-Chloroethyl)-N-(prop-2-yn-1-yl)aniline 1f (<sup>1</sup>H-NMR)

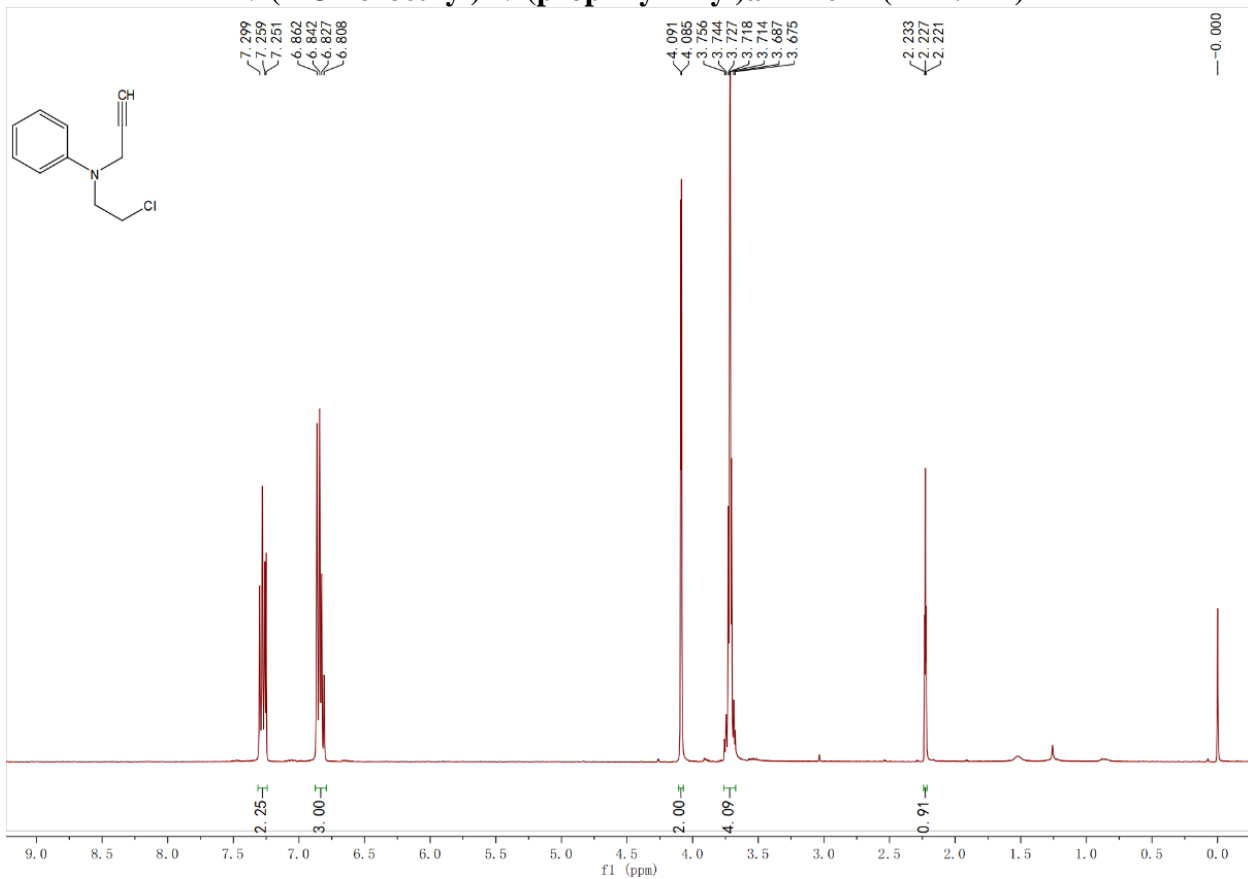

***N*-(2-Chloroethyl)-*N*-(prop-2-yn-1-yl)aniline 1f (<sup>13</sup>C-NMR)**

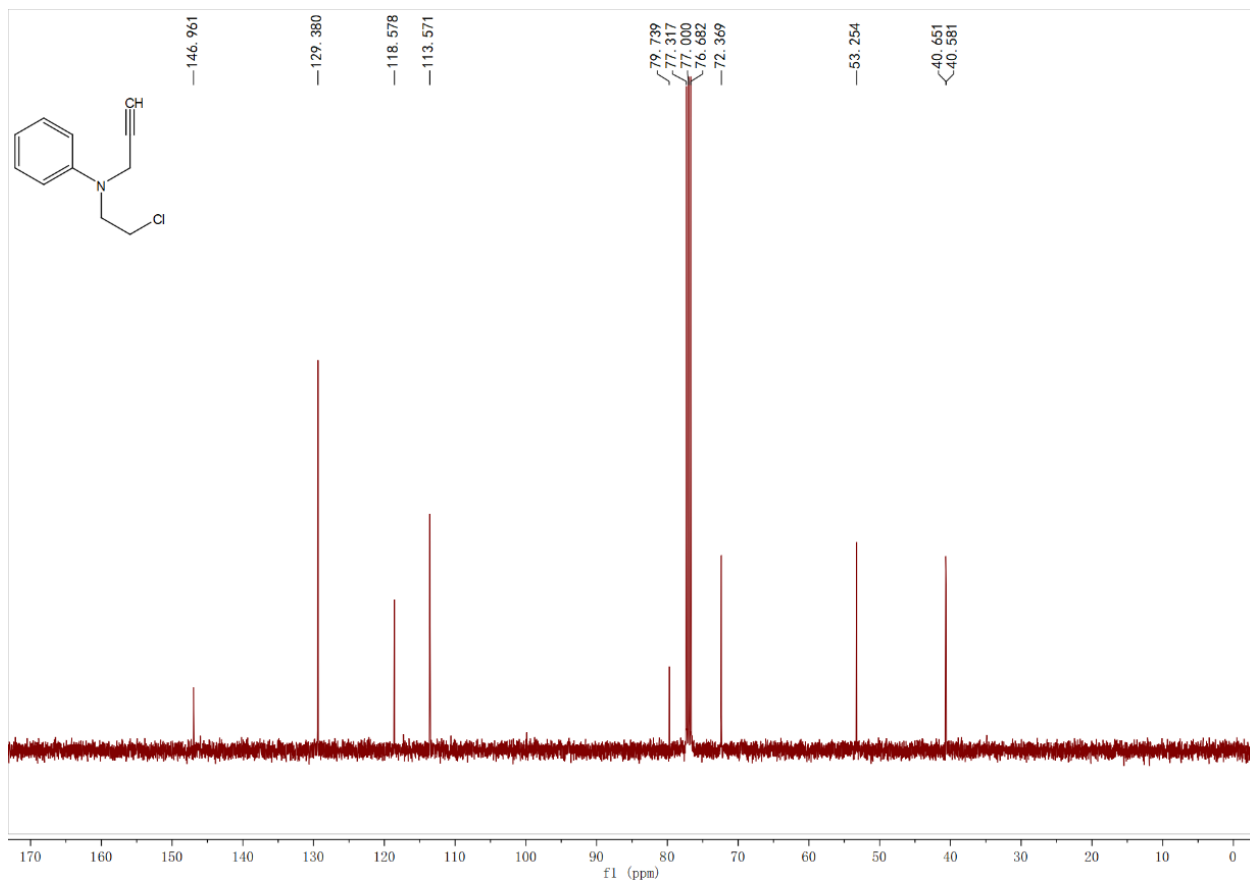

**4-Methoxy-*N*-benzyl-*N*-(2-propynyl)aniline 1g (<sup>1</sup>H-NMR)**

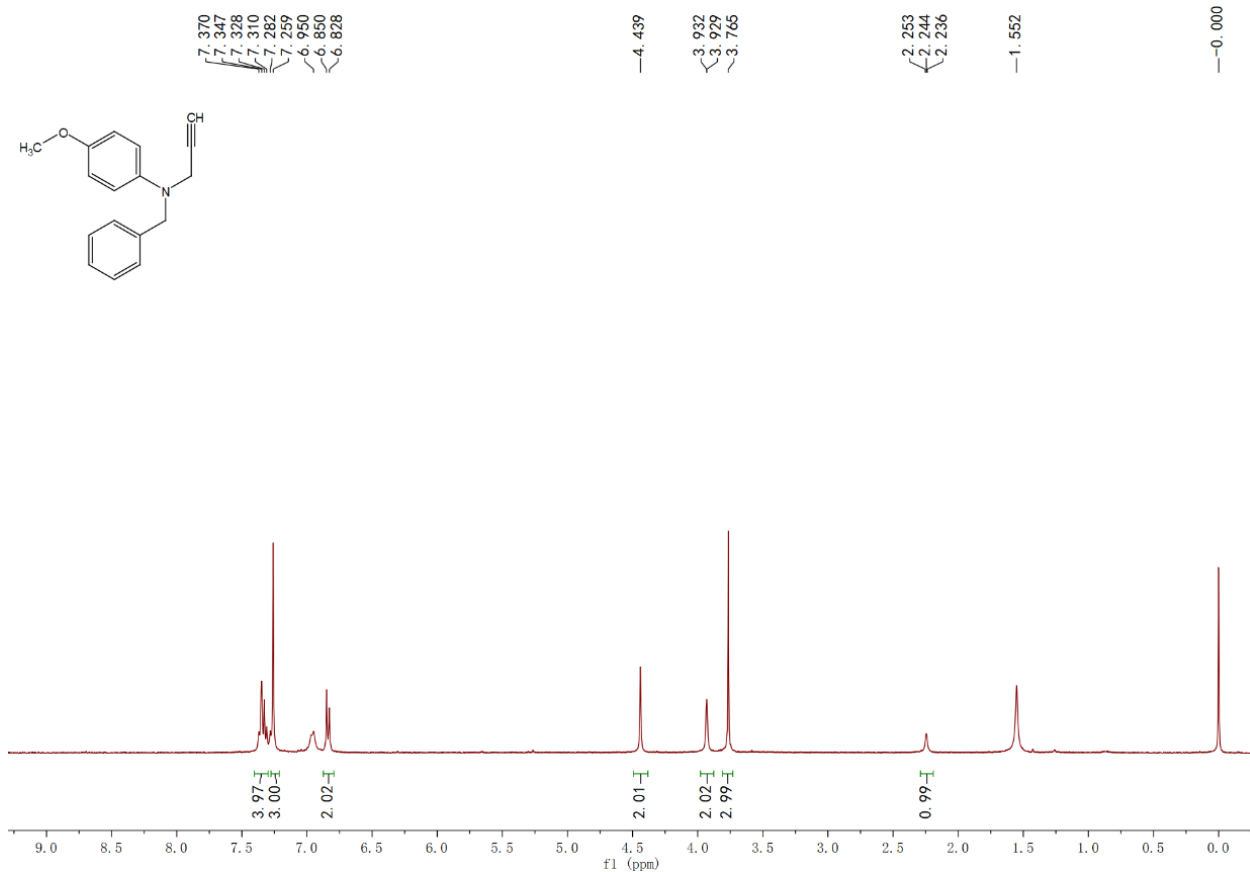

### 4-Methyl-N-benzyl-N-(2-propynyl)aniline 1h (<sup>1</sup>H-NMR)

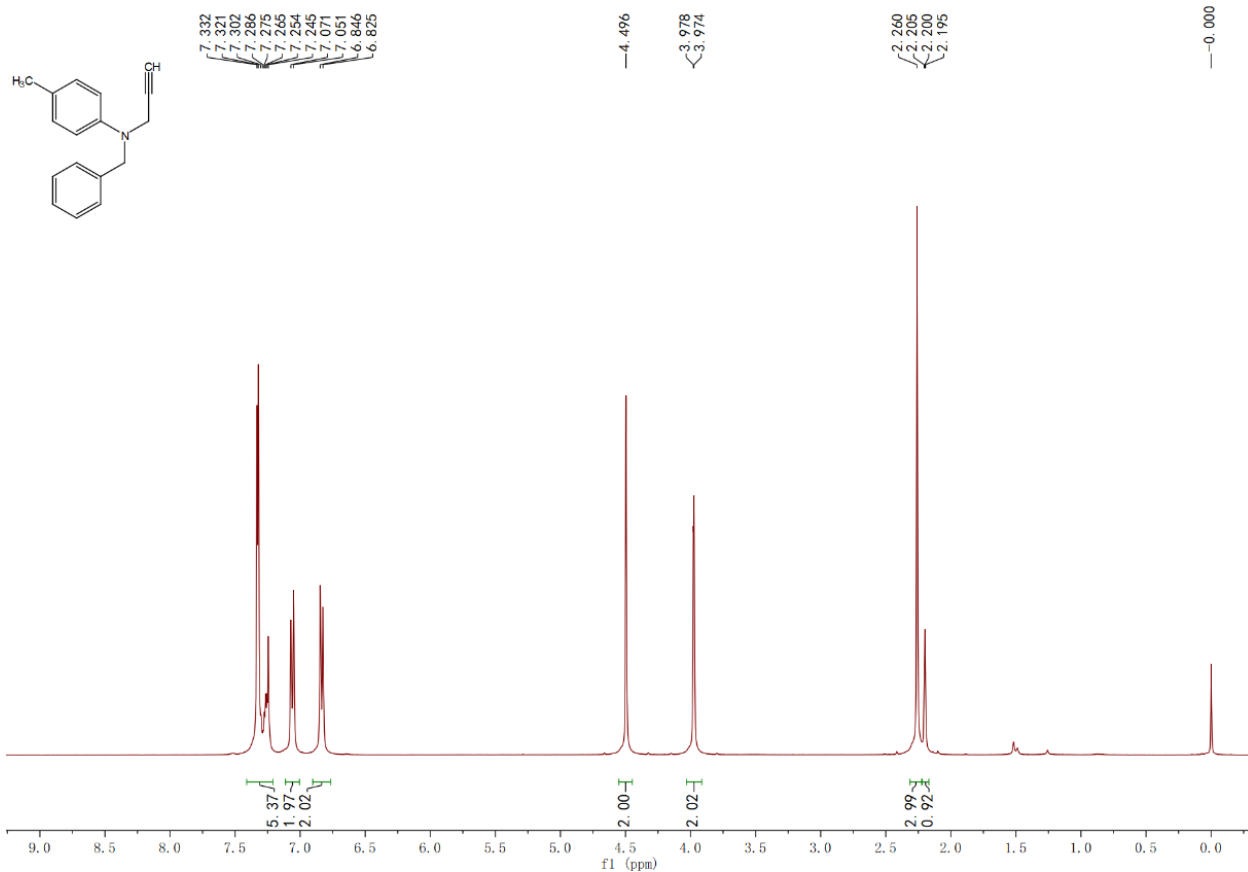

### 4-Fluoro-N-benzyl-N-(2-propynyl)aniline 1i (<sup>1</sup>H-NMR)

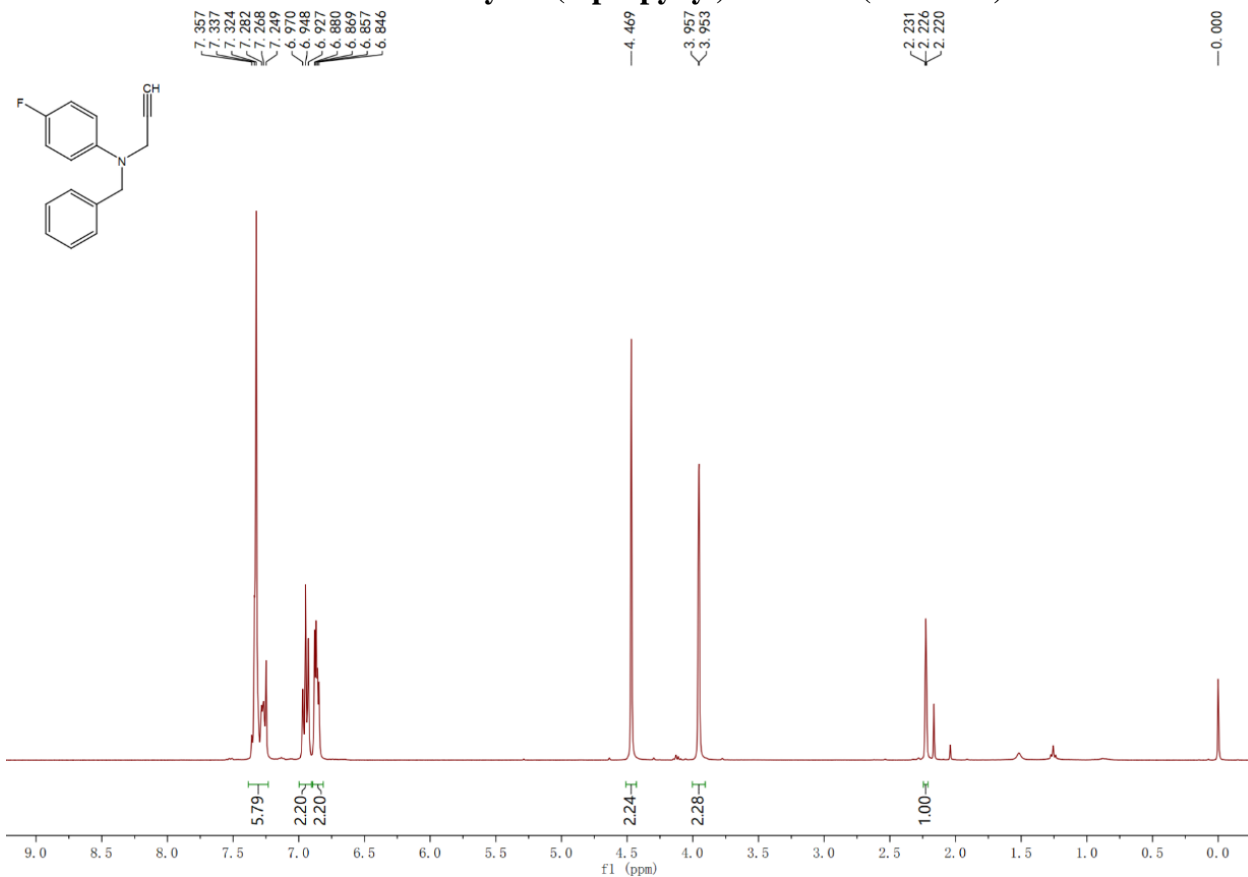

### 4-Fluoro-N-benzyl-N-(2-propynyl)aniline 1i (<sup>13</sup>C-NMR)

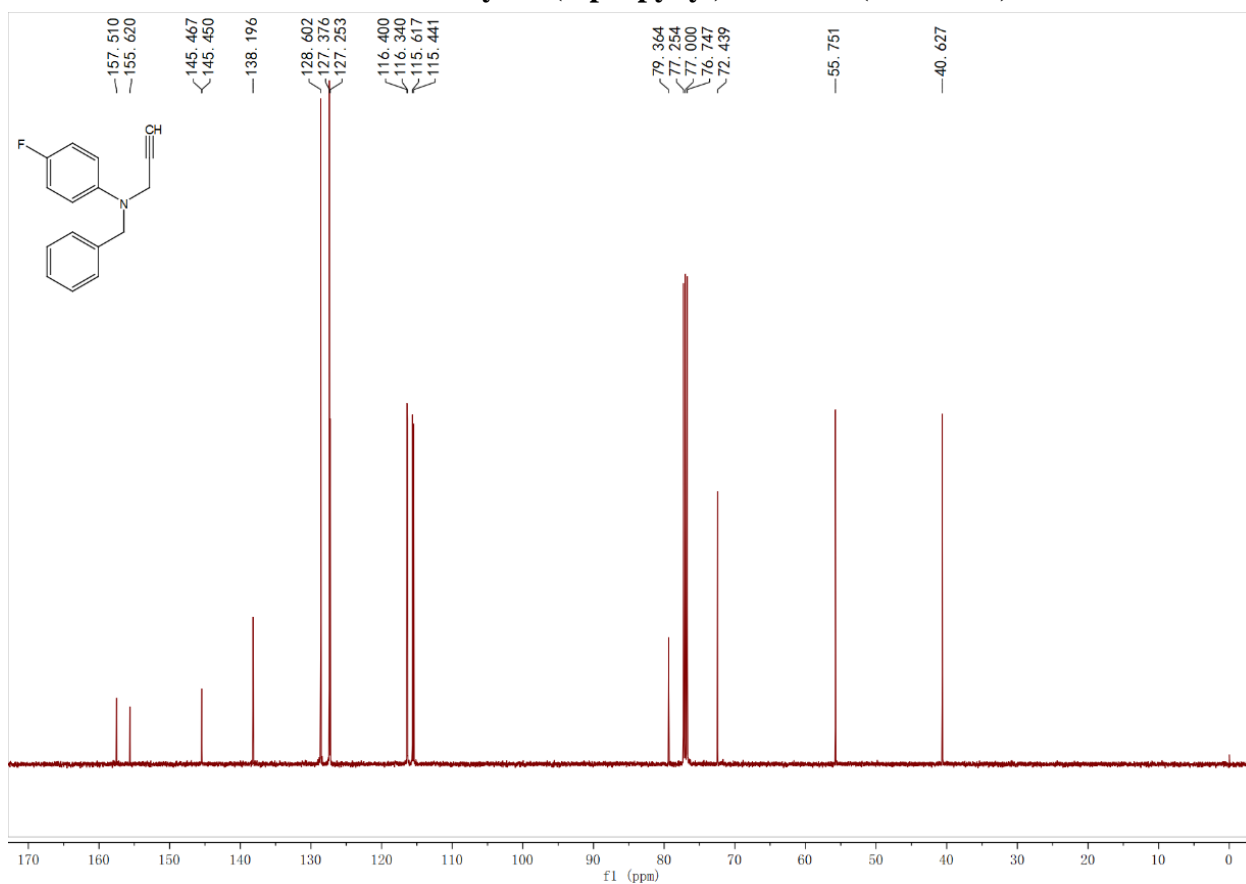

### 4-Chloro-N-benzyl-N-(2-propynyl)aniline 1j (<sup>1</sup>H-NMR)

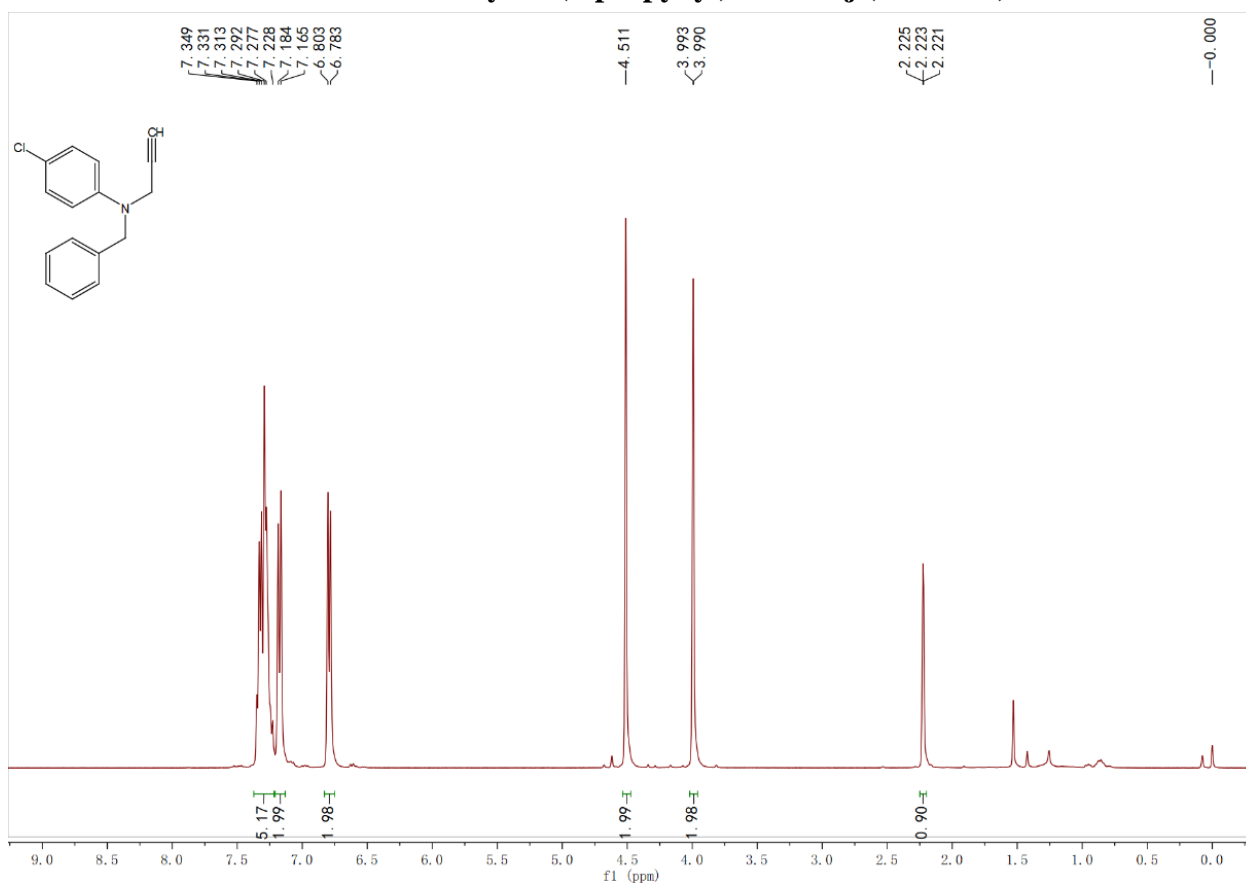



***N*-Benzyl-*N*-(3-phenyl-2-propynyl)aniline 1k (<sup>1</sup>H-NMR)**

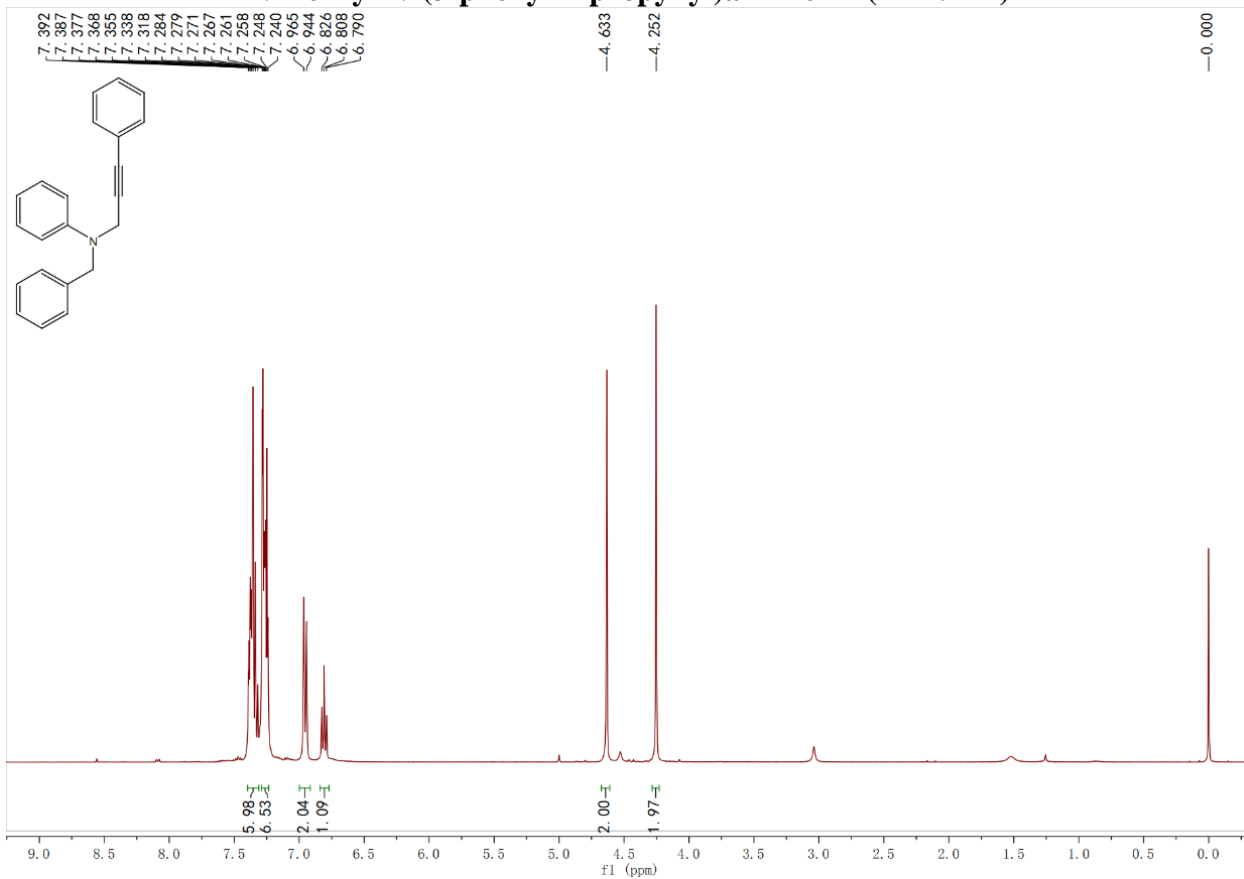

***N*-Benzyl-*N*-(2-heptynyl)aniline 1l (<sup>1</sup>H-NMR)**

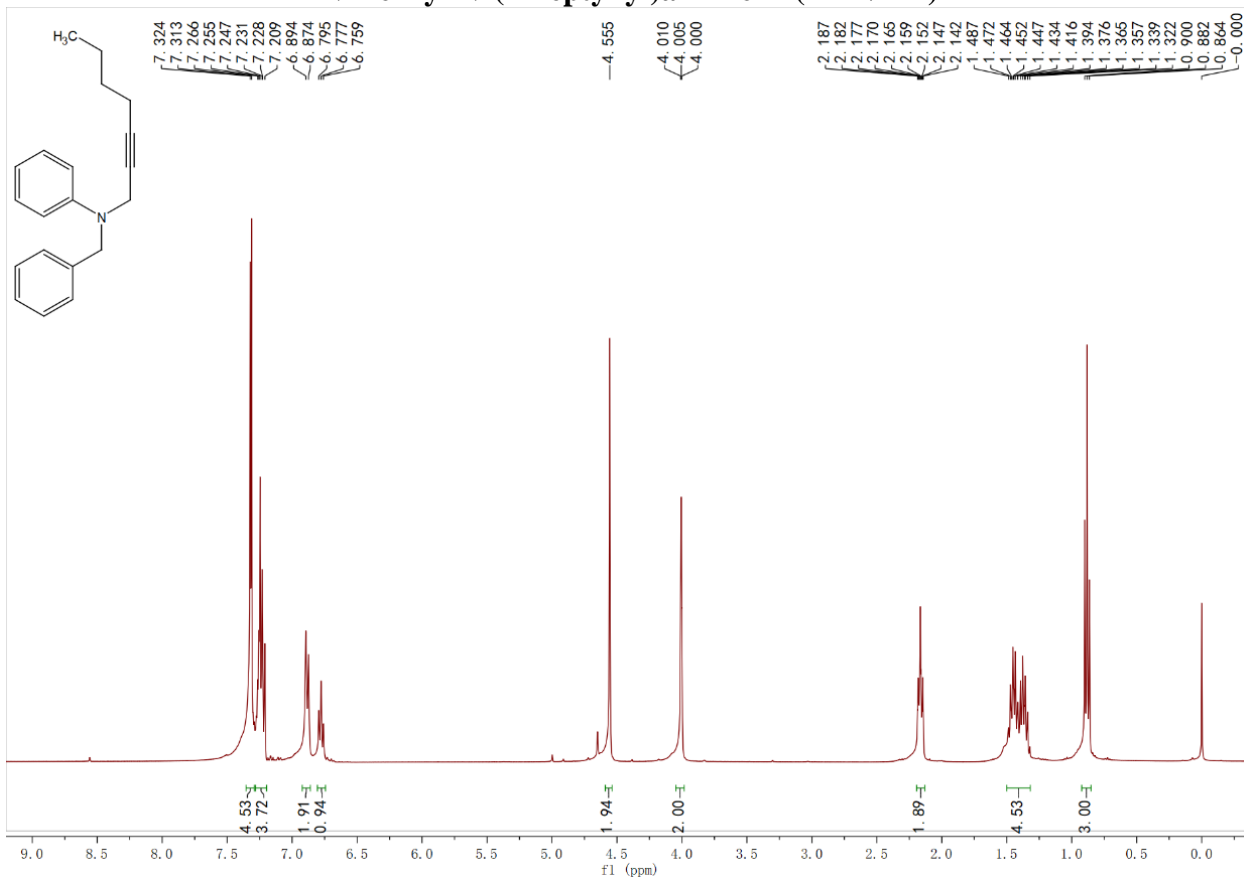

### *N*-Benzyl-*N*-(3-methyl-2-propynyl)aniline 1m (<sup>1</sup>H-NMR)

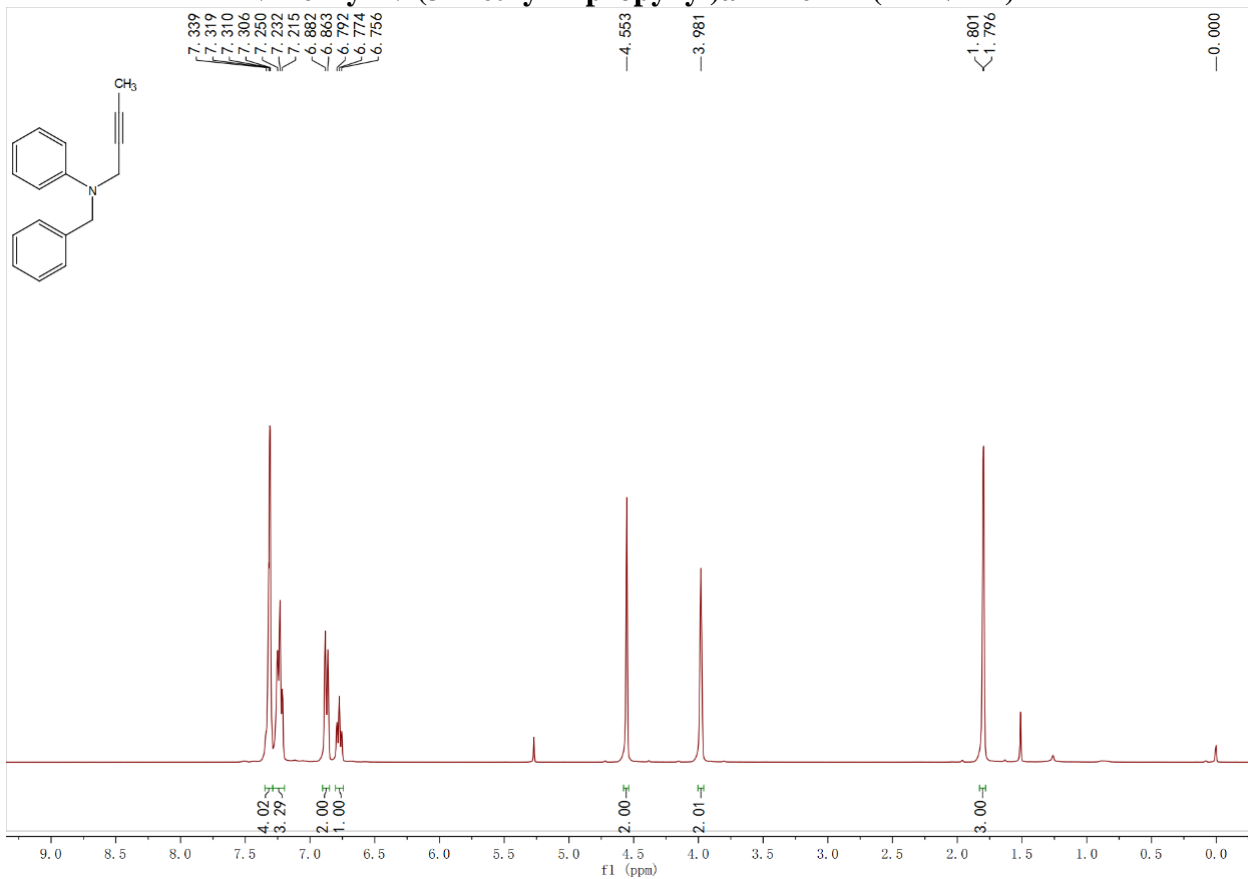

### *N*-Benzyl-*N*-(3-methyl-2-propynyl)aniline 1m (<sup>13</sup>C-NMR)

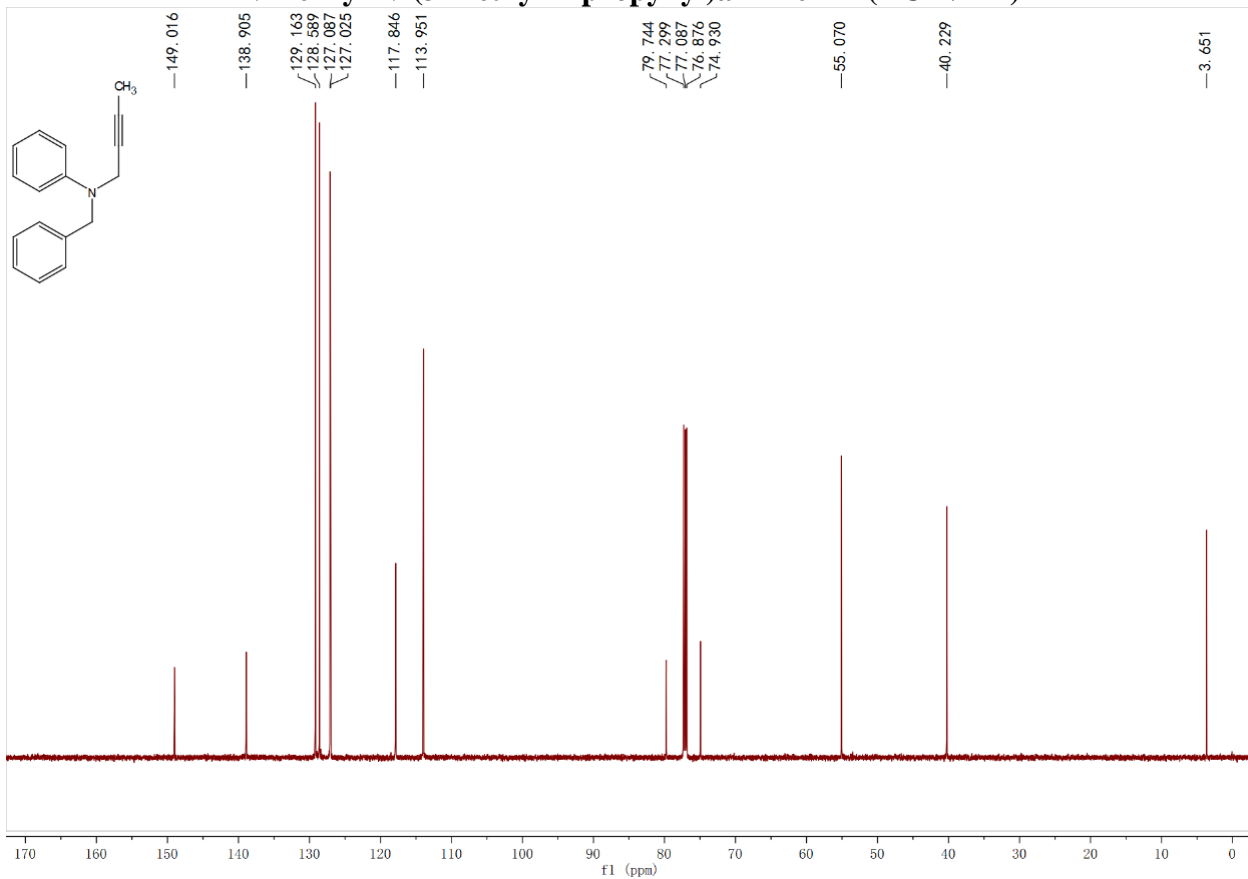

### 4-Ethynyl-1,2-dimethoxybenzene 8g (<sup>1</sup>H-NMR)

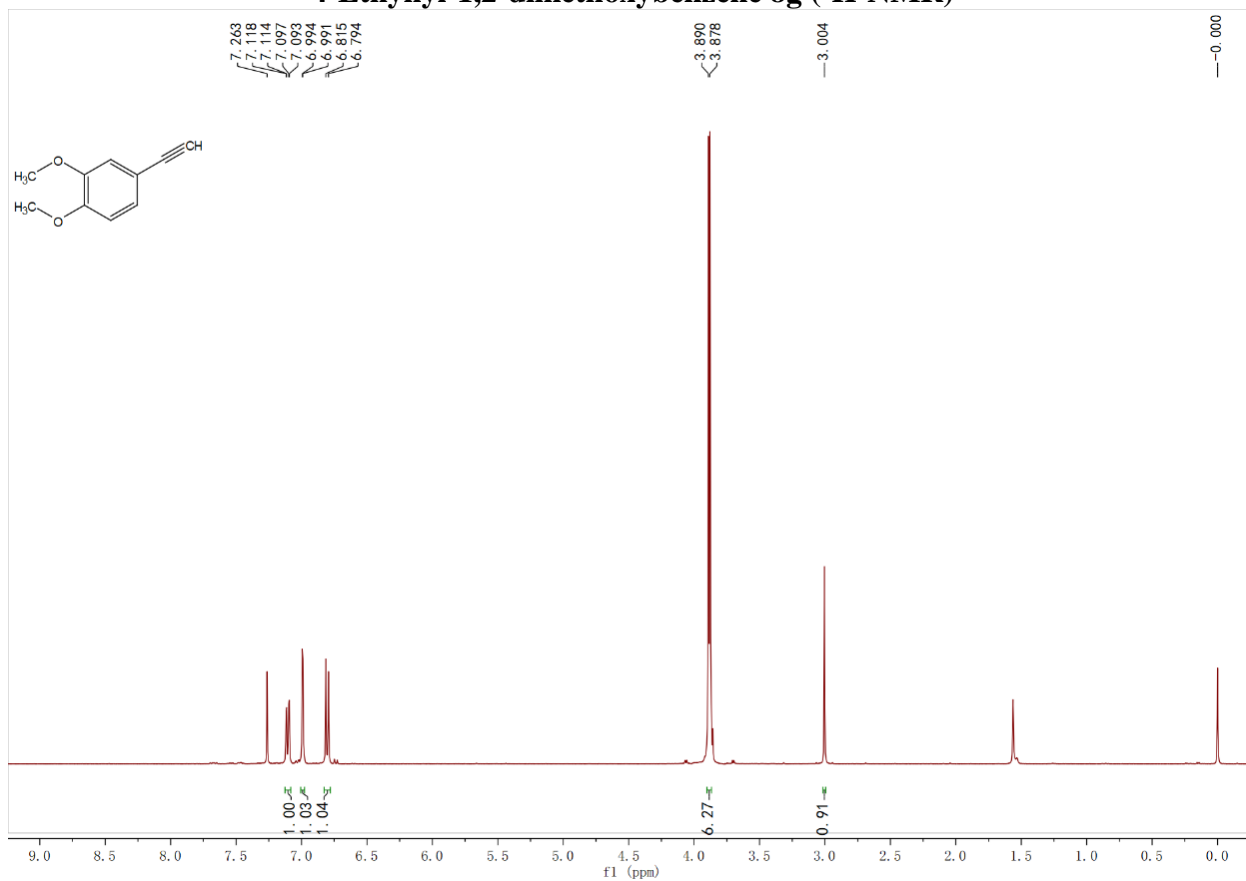

### 5-ethynylbenzo[d][1,3]dioxole 8h (<sup>1</sup>H-NMR)

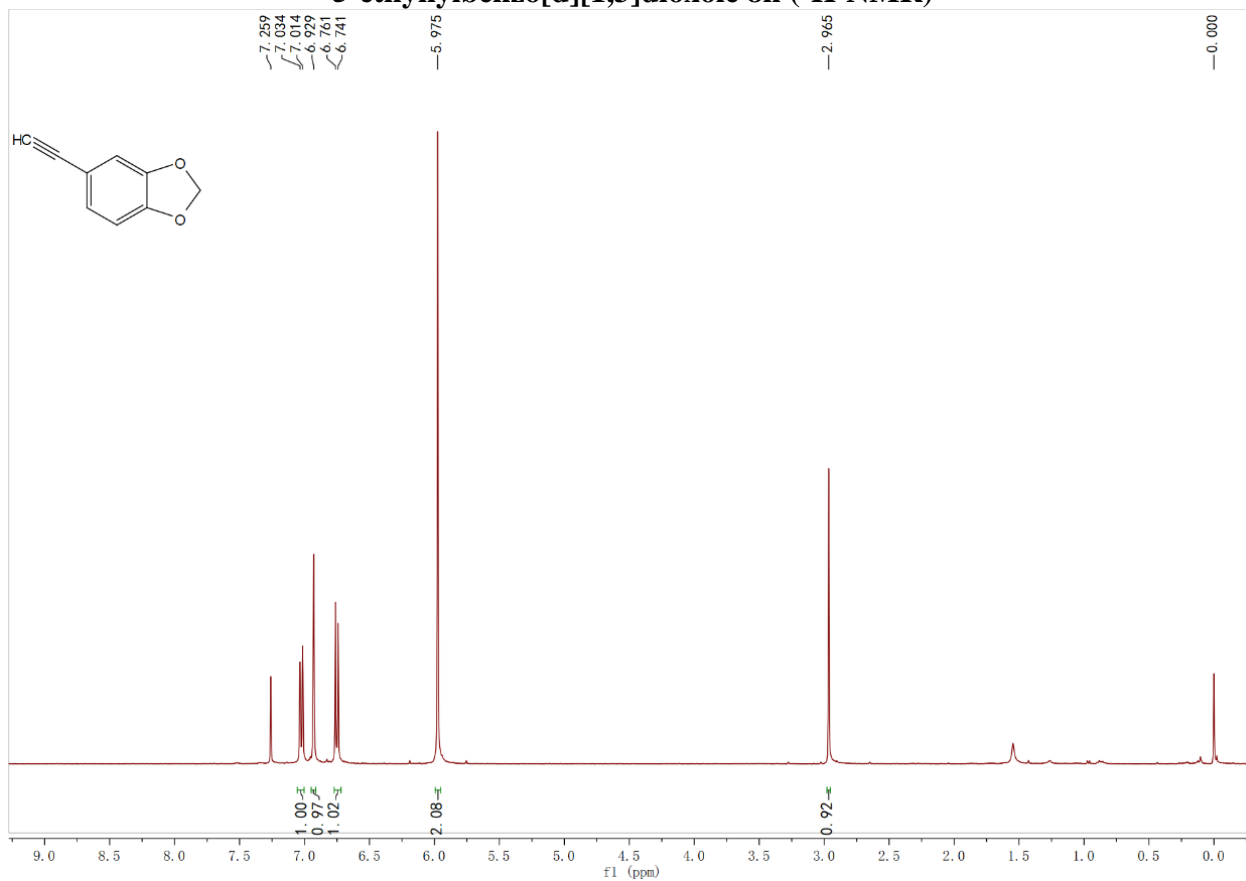

***N*-Benzyl-*N*-(prop-2-yn-1-yl-3-*d*)aniline *d*-1a (<sup>1</sup>H-NMR)**

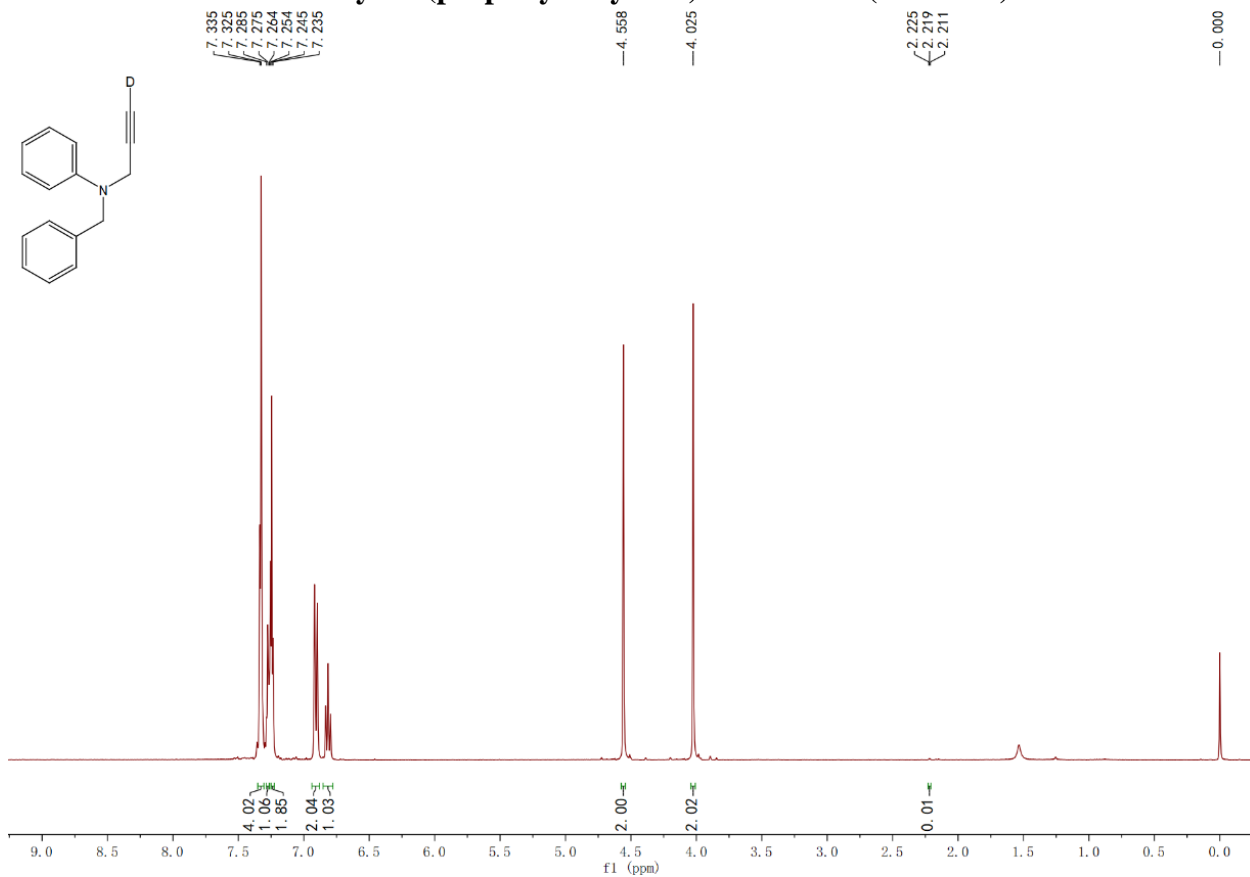

***N*-Benzyl-*N*-(prop-2-yn-1-yl-1,1-*d*2)aniline *d*-1a' (<sup>1</sup>H-NMR)**

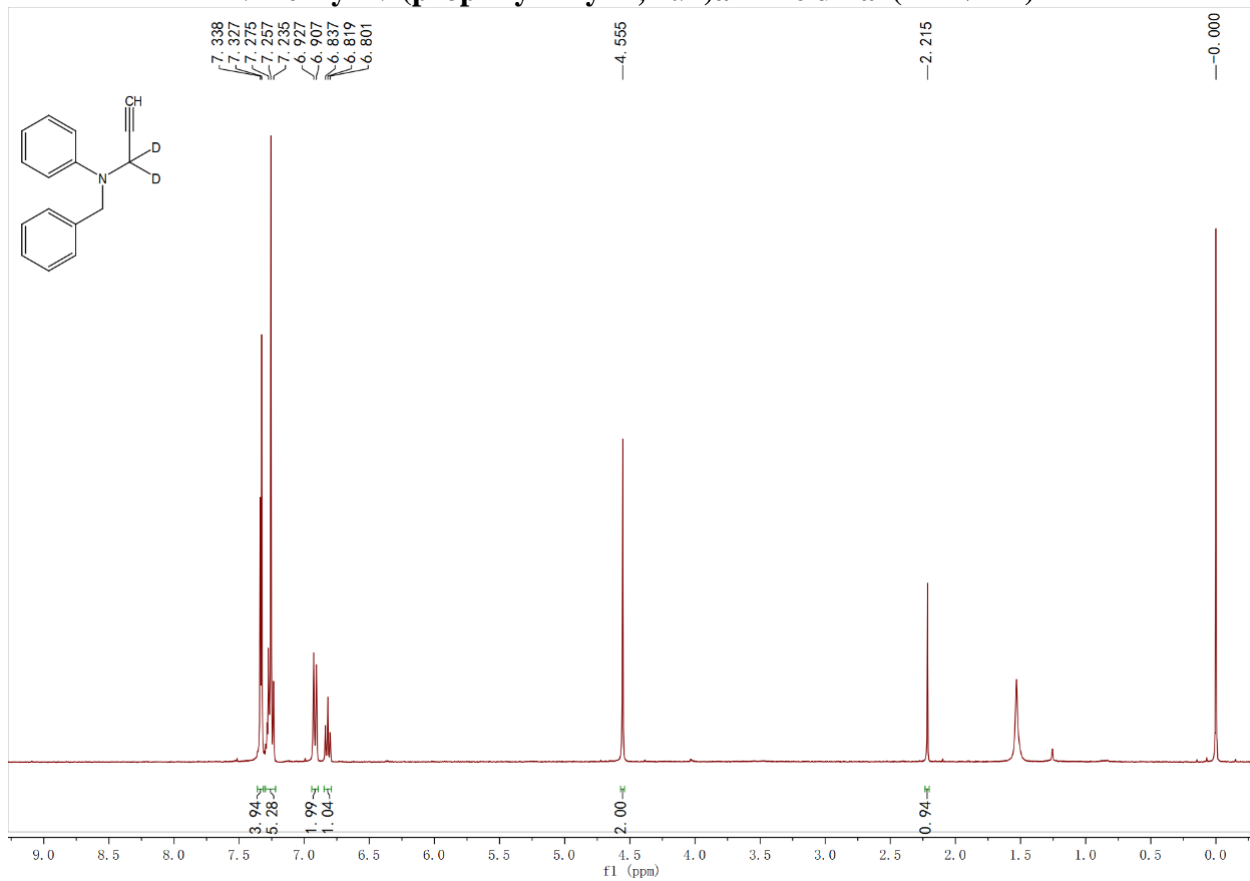

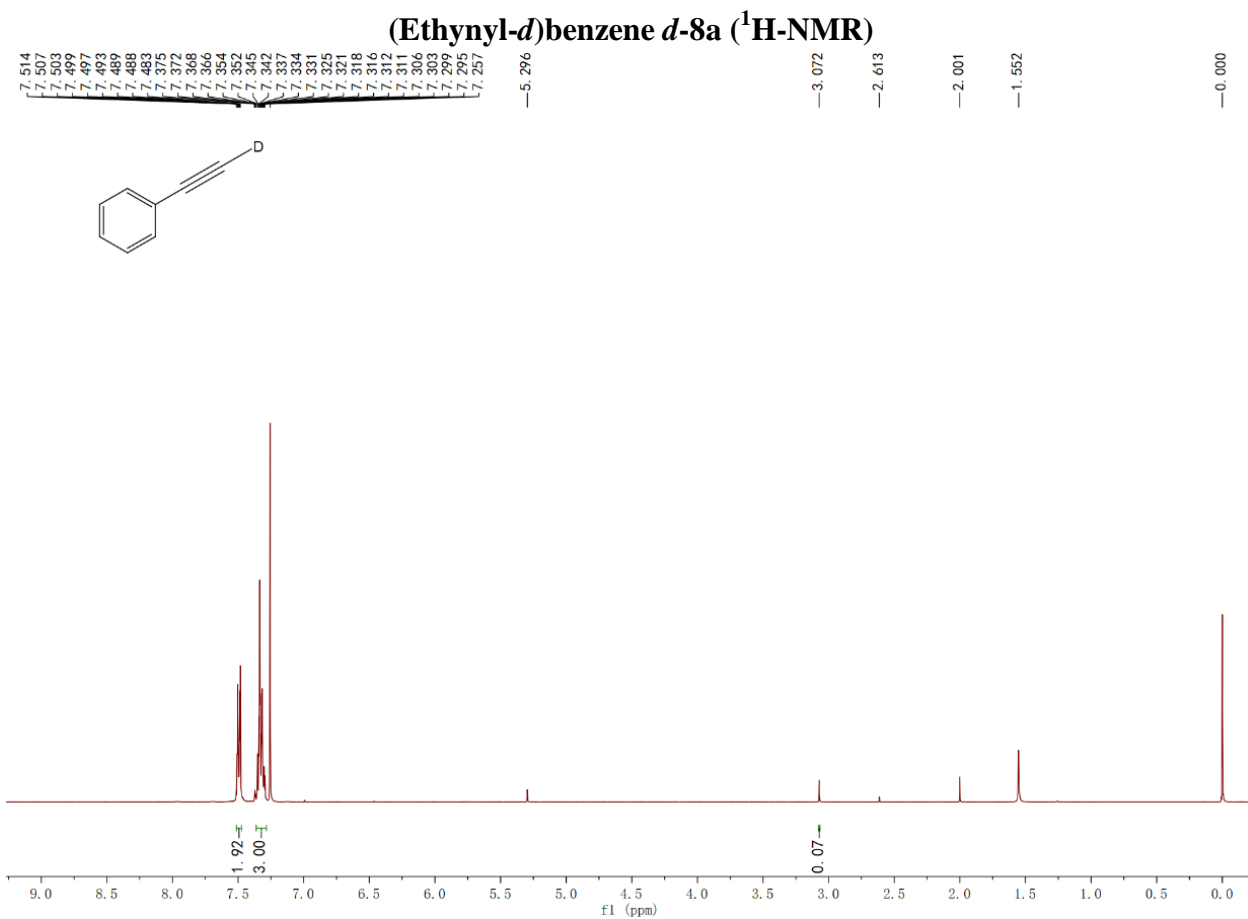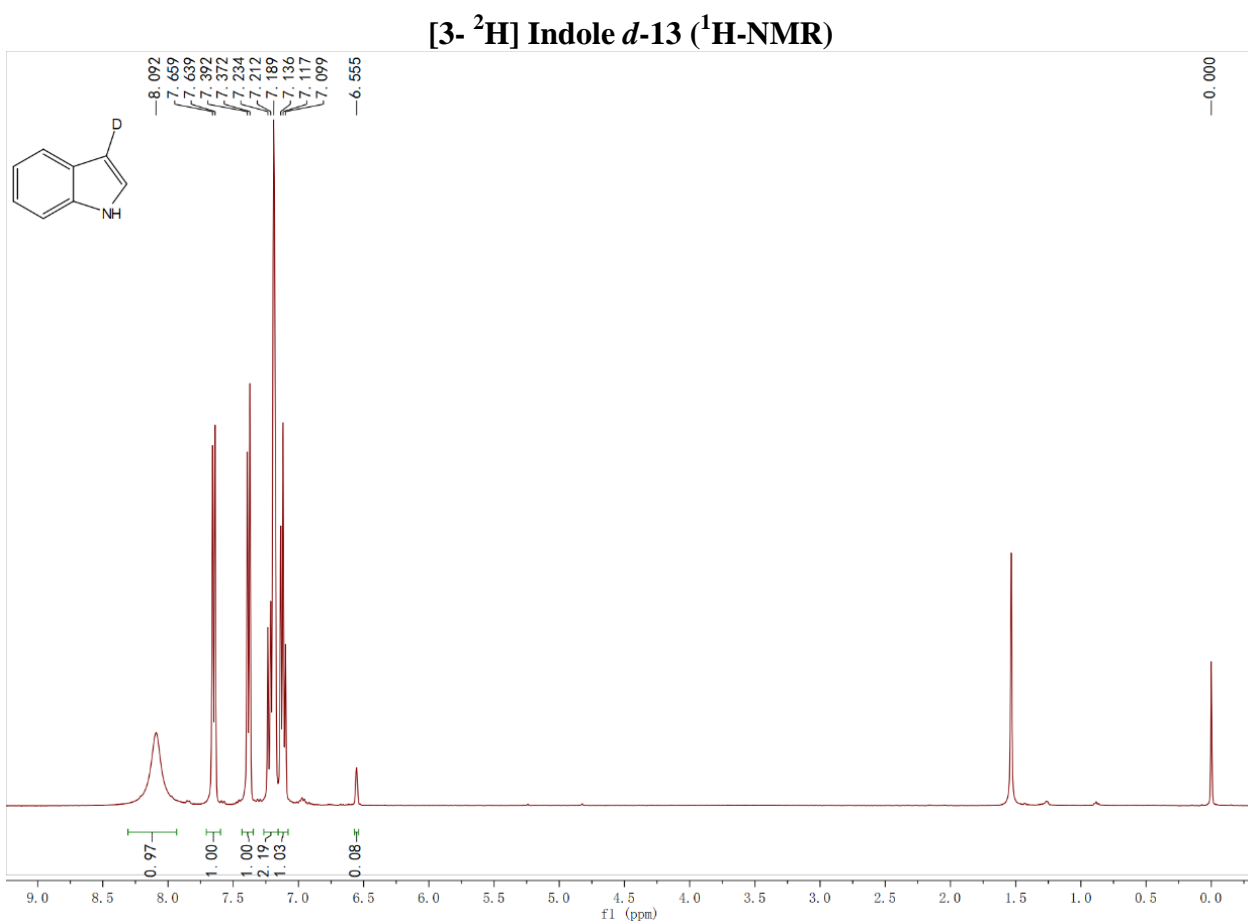

Supplement: d0cc02921a1.pdf [file d0cc02921a1.pdf]
